# Supplementary material for: Effects of an Alternating Magnetic Field towards Dispersion of α-Fe2O3/TiO2 Magnetic Filler in PPOdm Polymer for CO2/CH4 Gas Separation
Source: MDPI journal article supplement (doi:10.3390/membranes11080641), 2021-08-20
Supplement: s1 [file s1]

## Supplementary Images

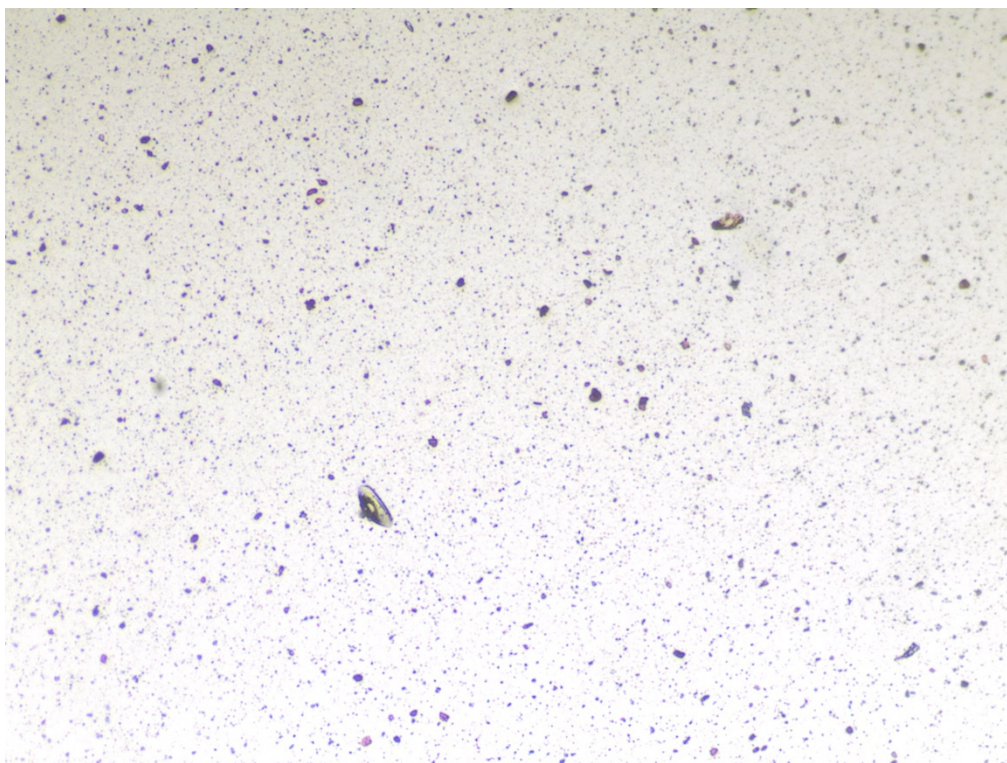

**Figure S1a:** OM image of MMM-1\*, micrograph no.1

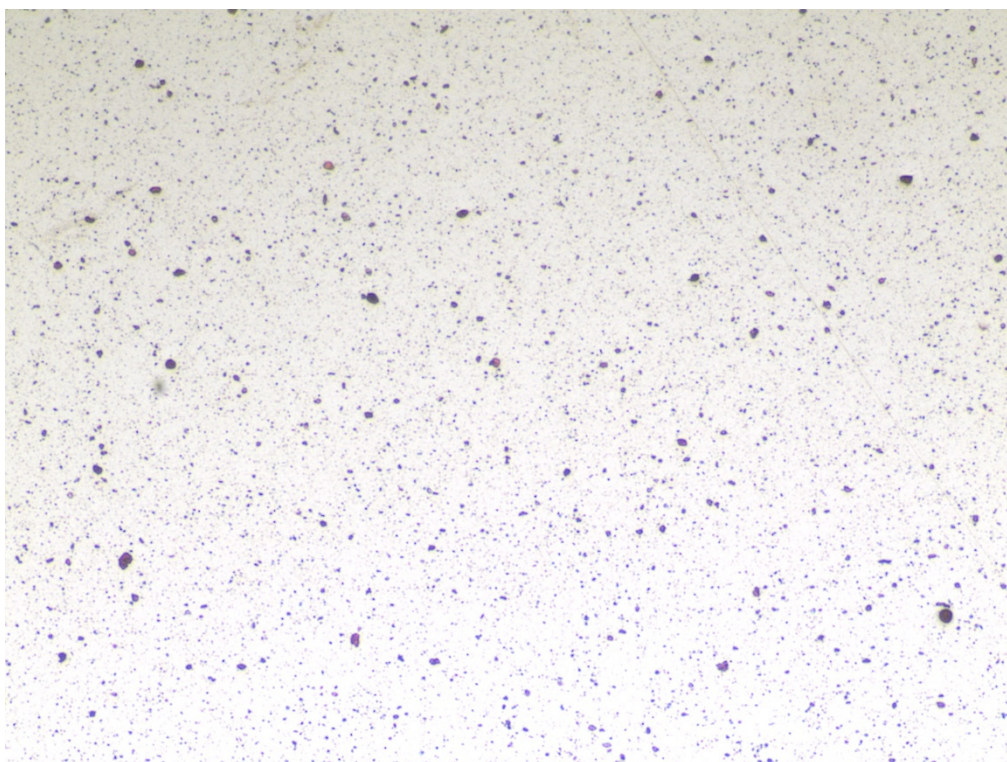

**Figure S2a:** OM image of MMM-1\*, micrograph no.2



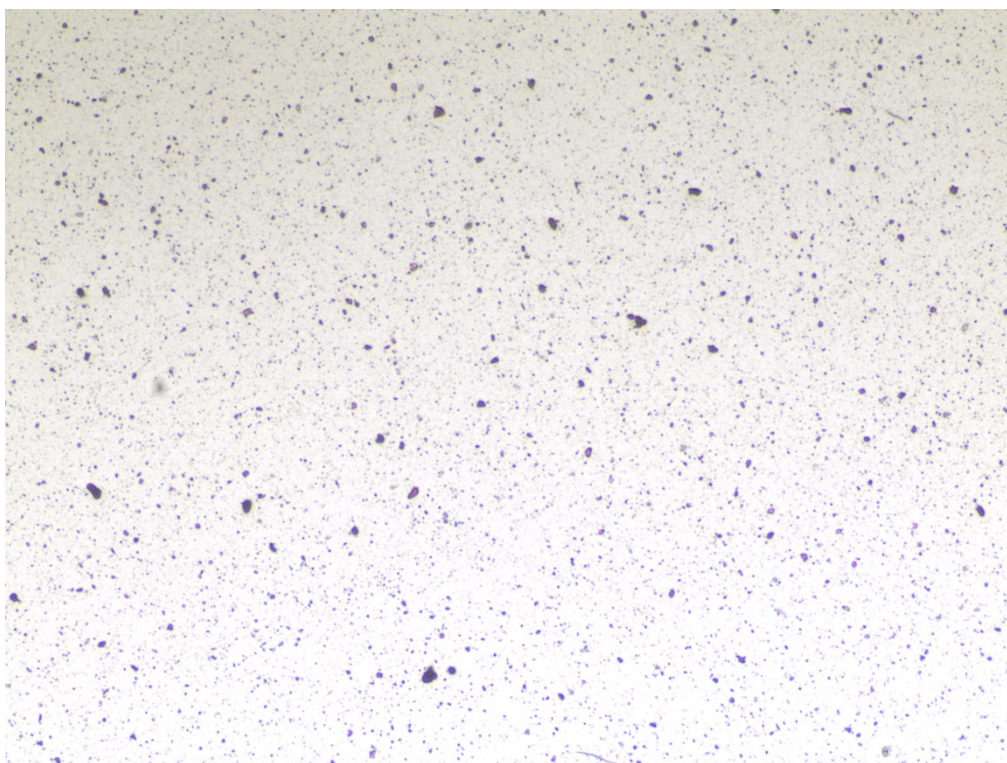

**Figure S3a:** OM image of MMM-1\*, micrograph no.3

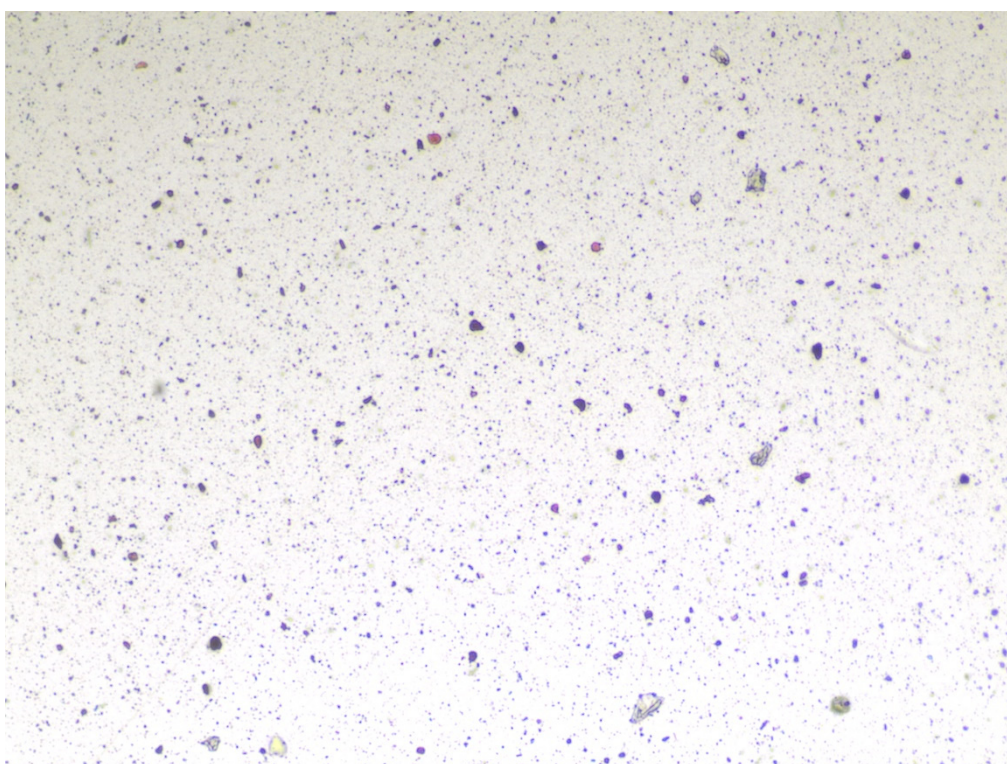

**Figure S4a:** OM image of MMM-1\*, micrograph no.4



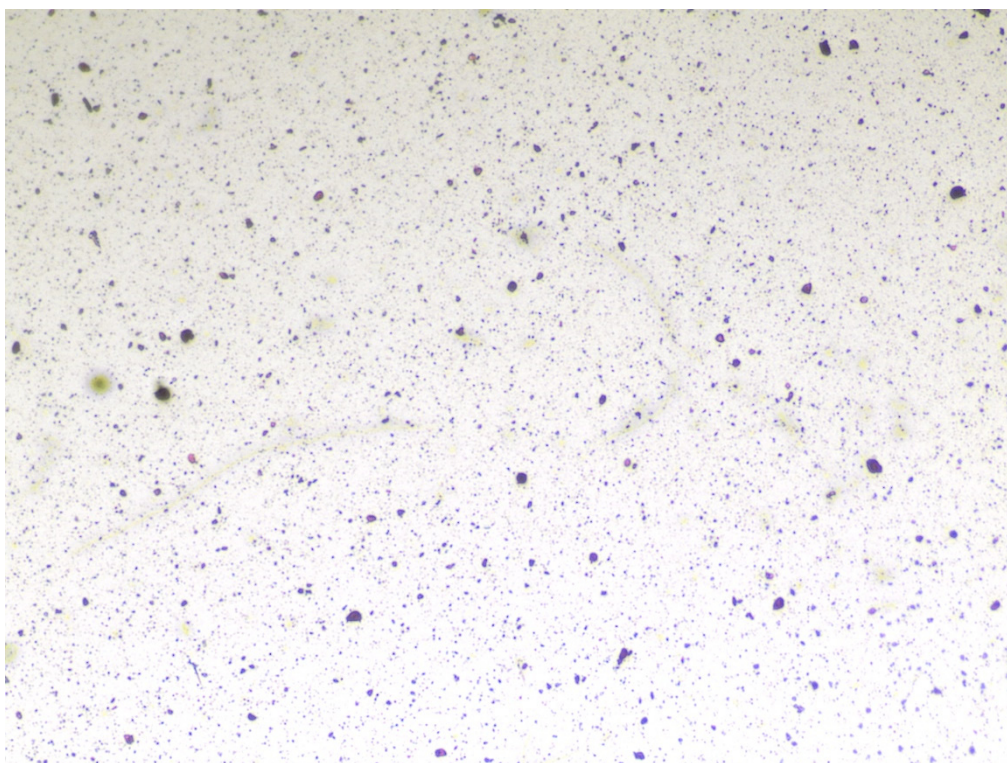

**Figure S5a:** OM image of MMM-1\*, micrograph no.5

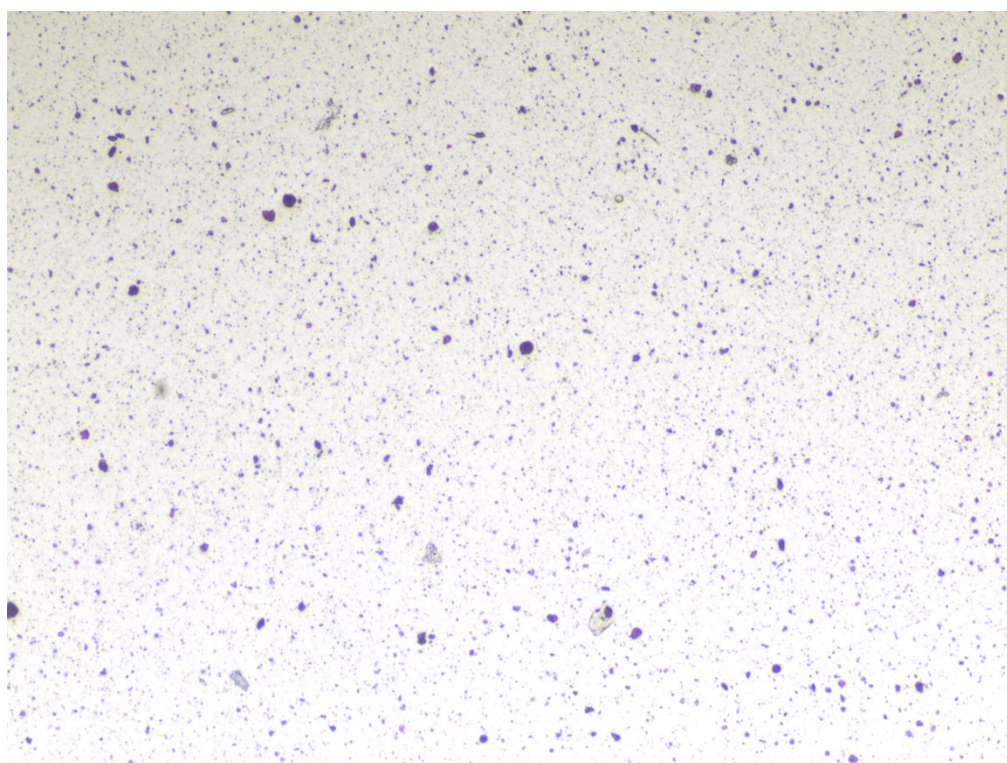

**Figure S6a:** OM image of MMM-1\*, micrograph no.6



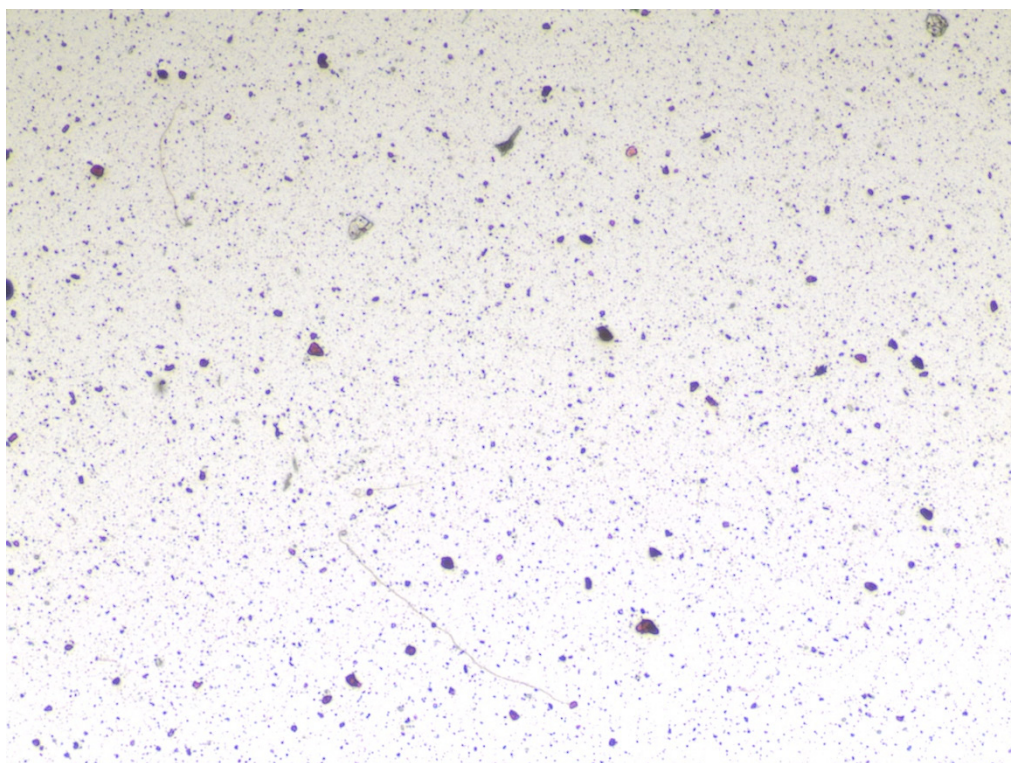

**Figure S7a:**

OM image of MMM-1\*, micrograph no.7

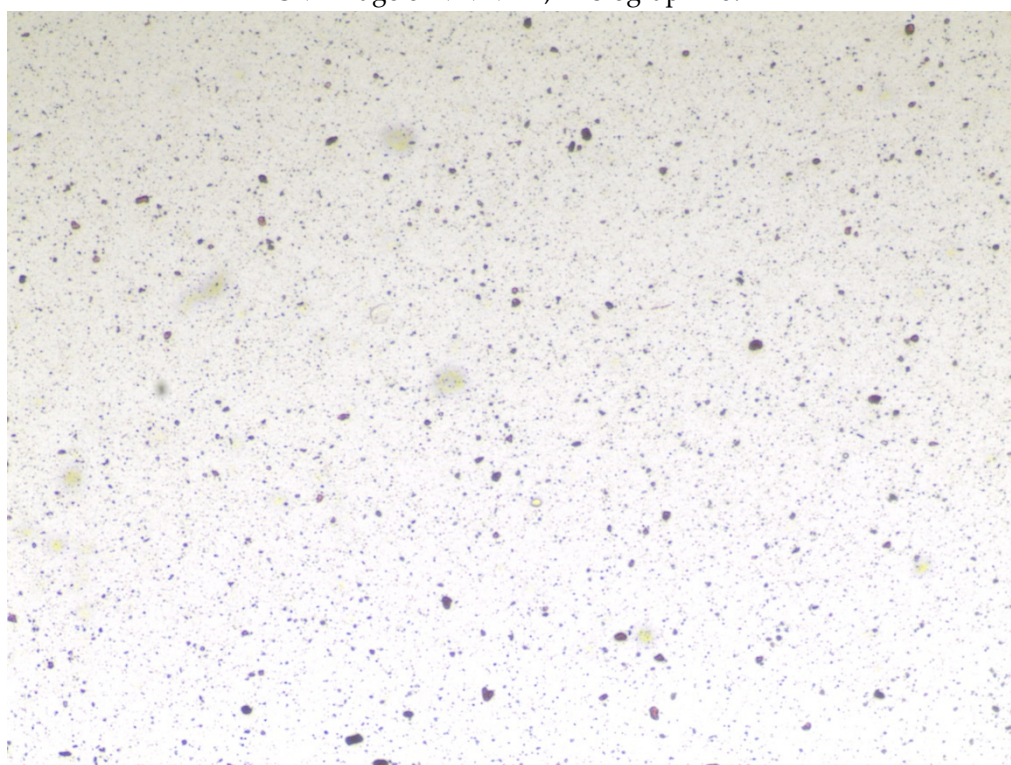

**Figure S8a:** OM image of MMM-1\*, micrograph no.8



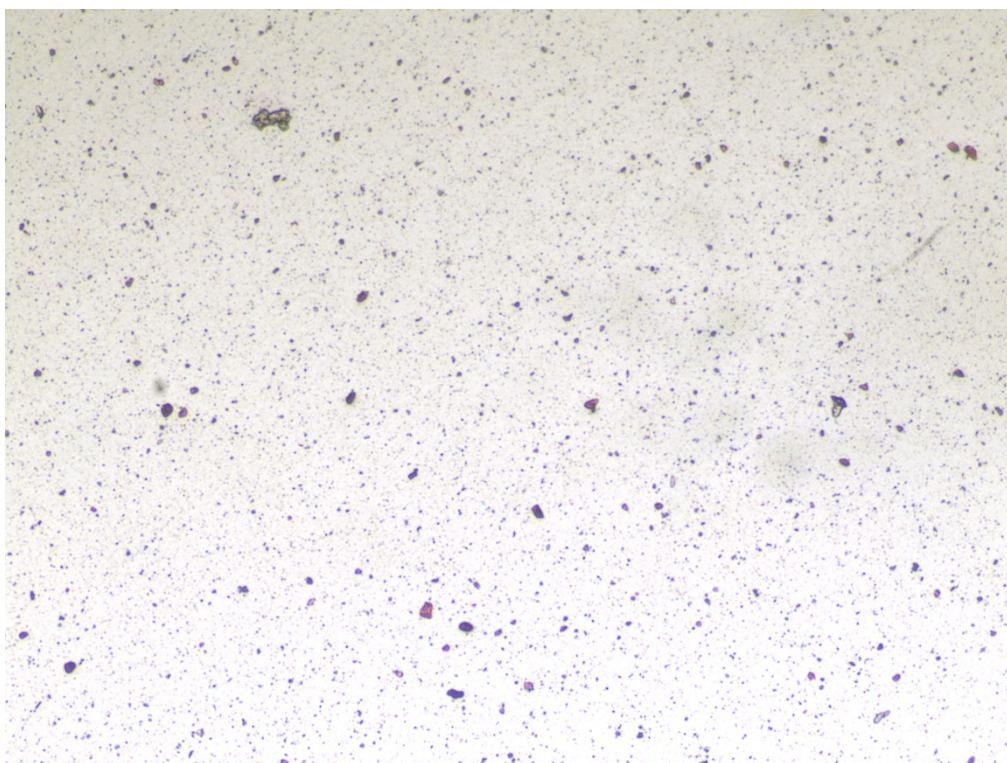

**Figure S9a:** OM image of MMM-1\*, micrograph no.9

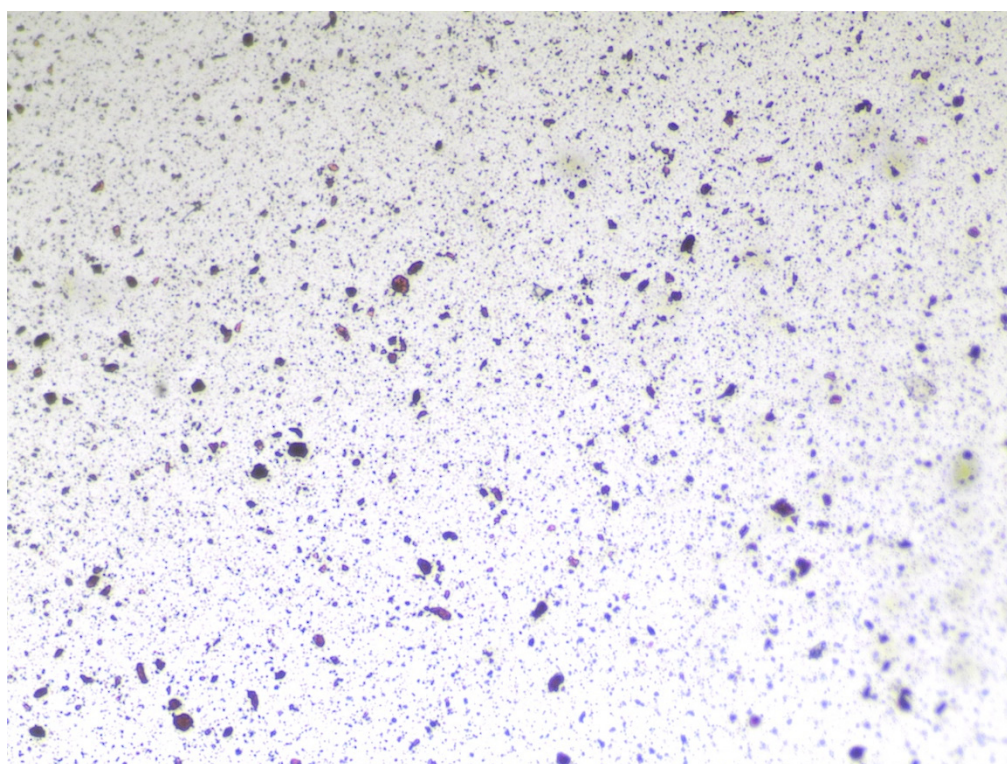

**Figure S10a:** OM image of MMM-3\*, micrograph no.1



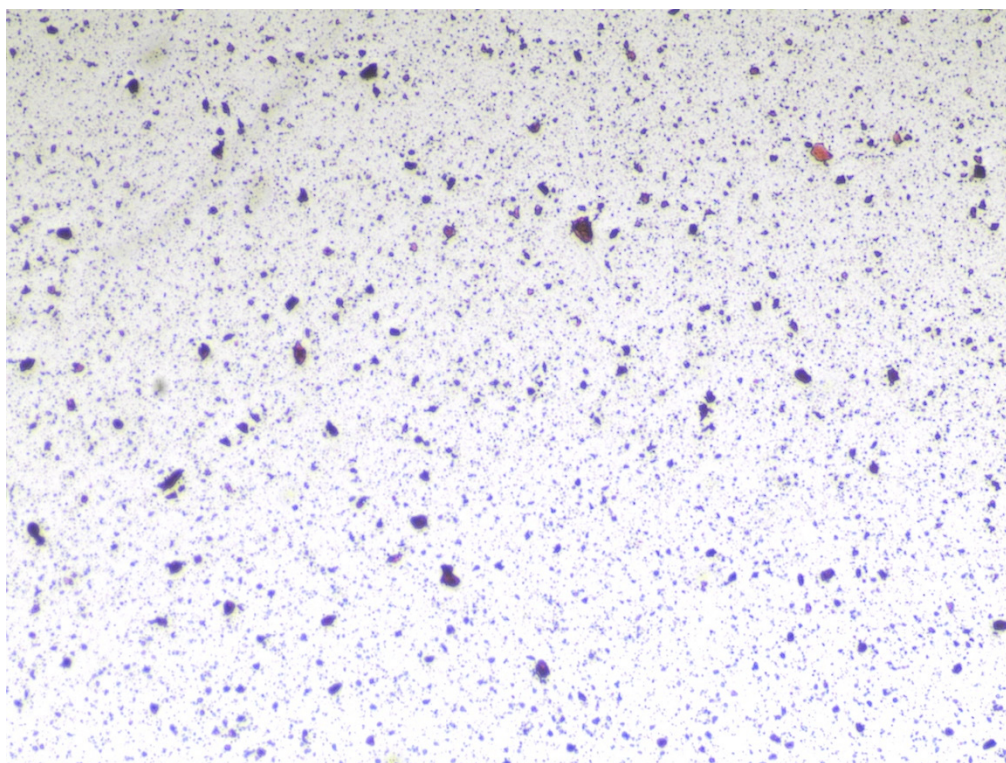

**Figure S11a:** OM image of MMM-3\*, micrograph no.2

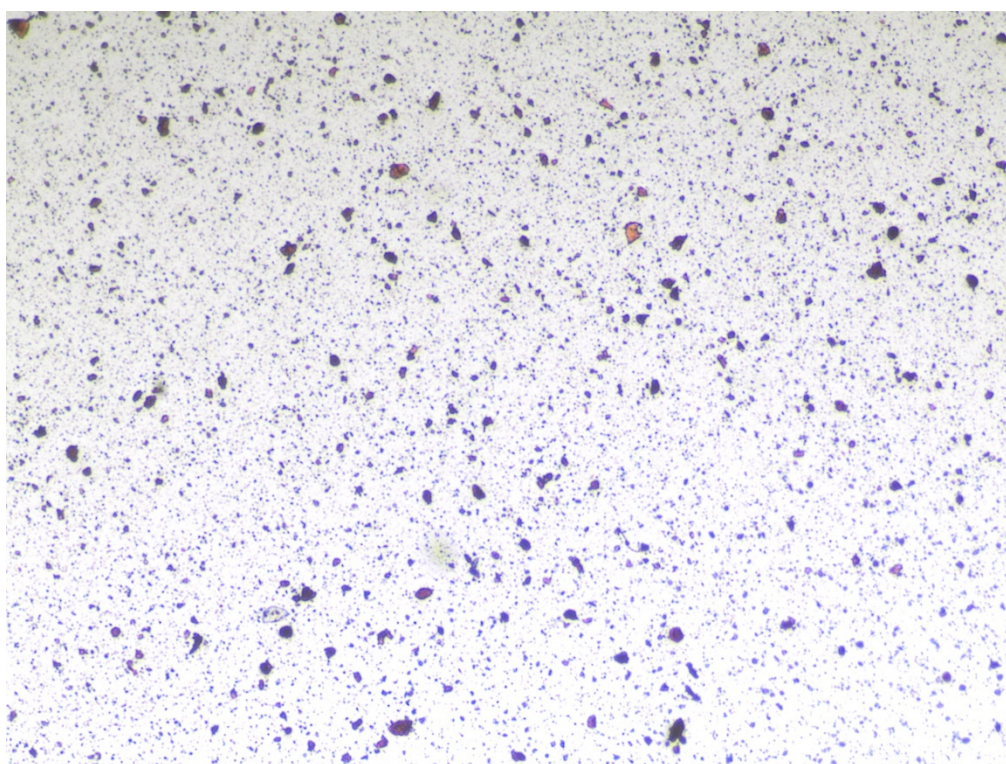

**Figure S12a:** OM image of MMM-3\*, micrograph no.3



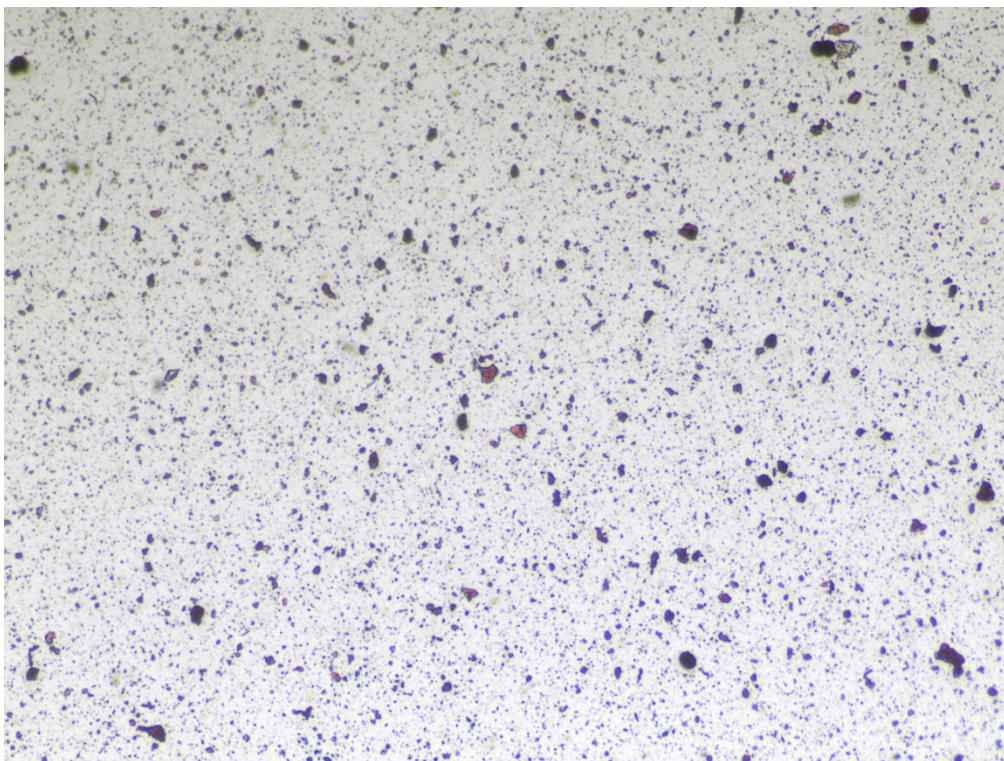

**Figure S13a:** OM image of MMM-3\*, micrograph no.4

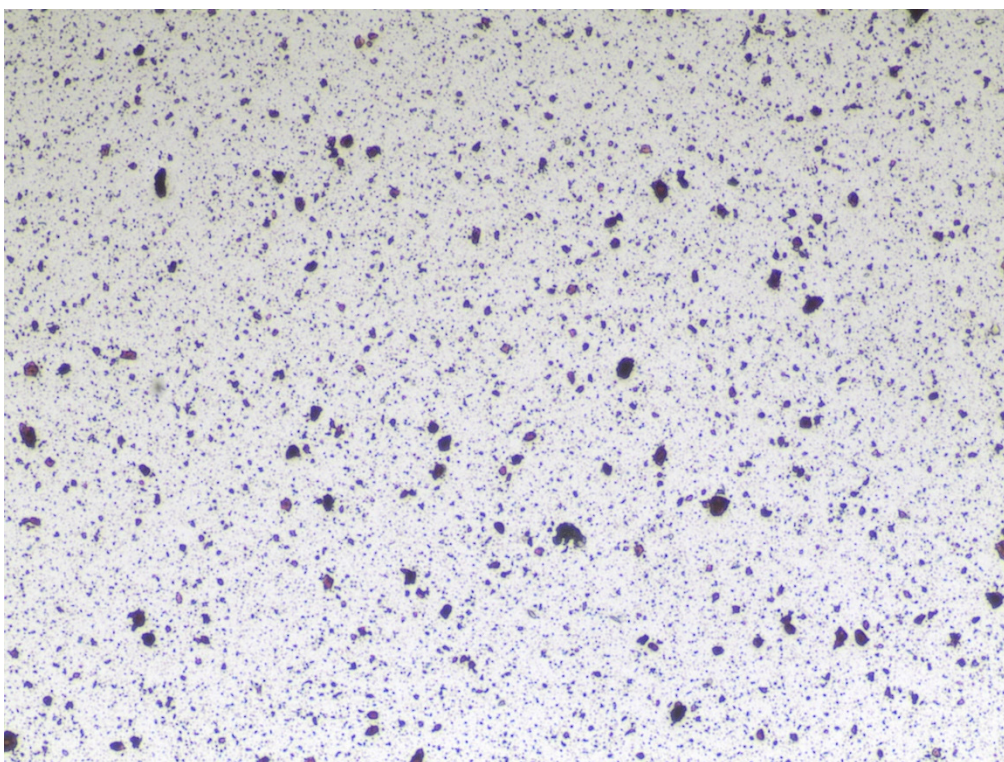

**Figure S14a:** OM image of MMM-3\*, micrograph no.5



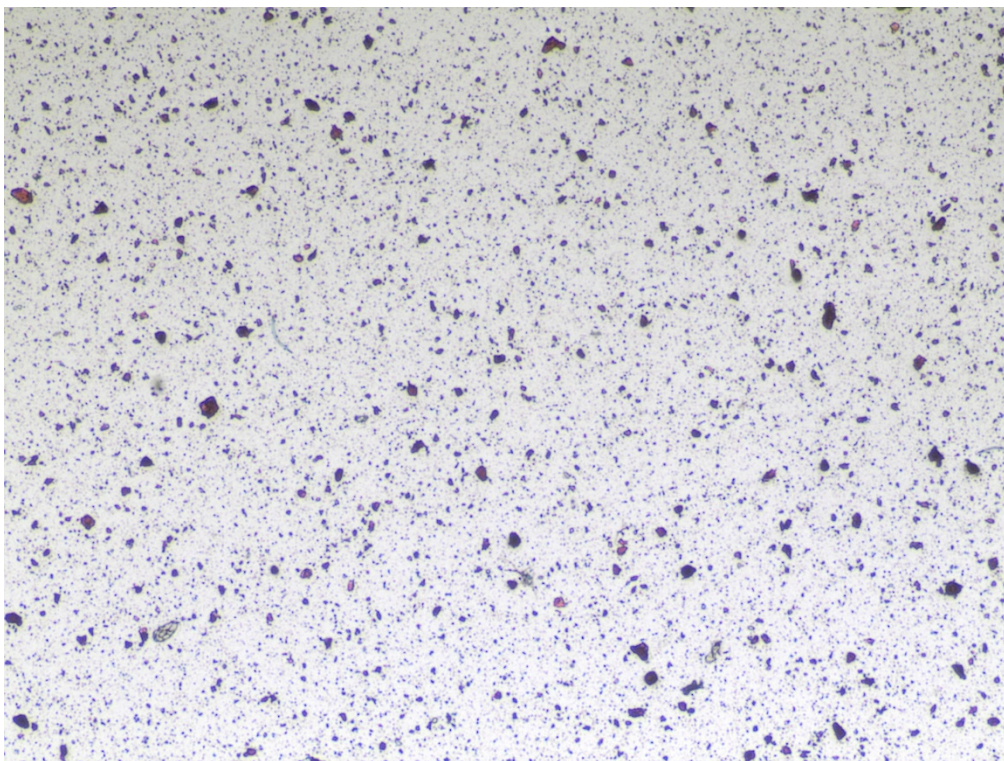

**Figure S15a:** OM image of MMM-3\*, micrograph no.6

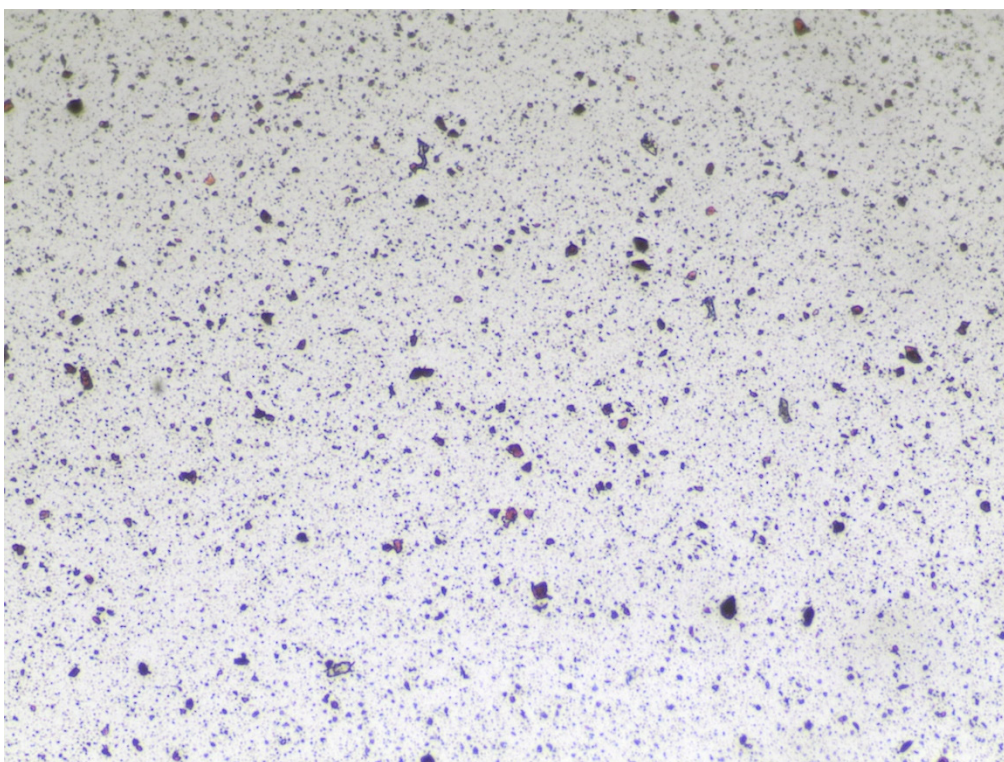

**Figure S16a:** OM image of MMM-3\*, micrograph no.7



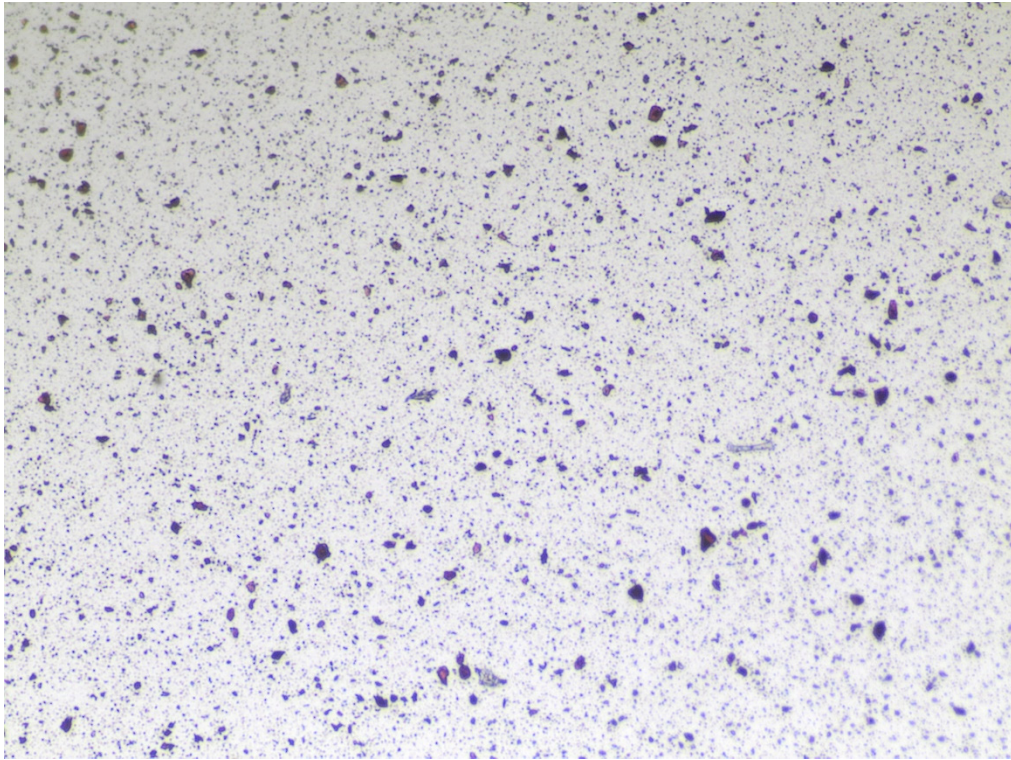

**Figure S17a:** OM image of MMM-3\*, micrograph no.8

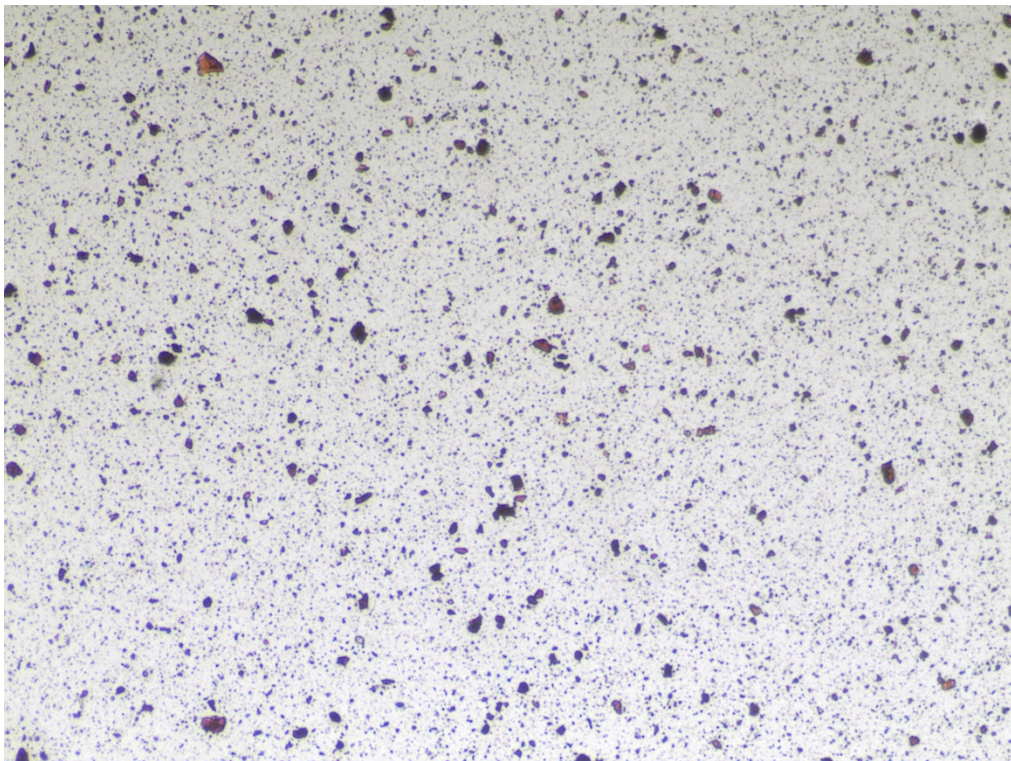

**Figure S18a:** OM image of MMM-3\*, micrograph no.9



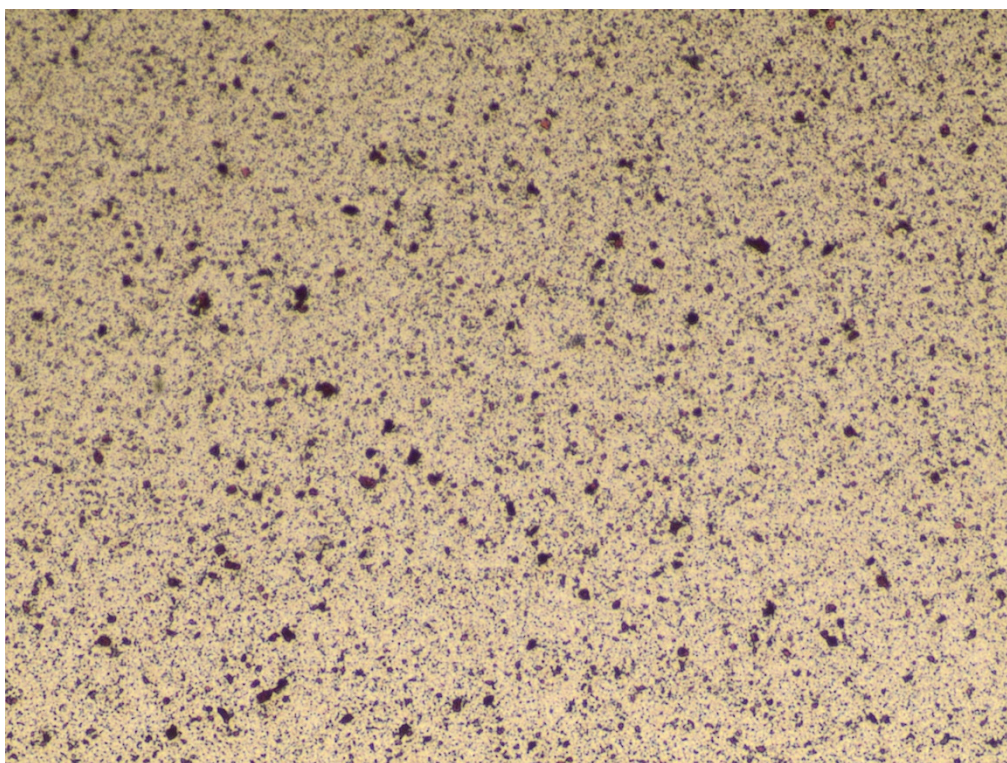

**Figure S19a:** OM image of MMM-5\*, micrograph no.1

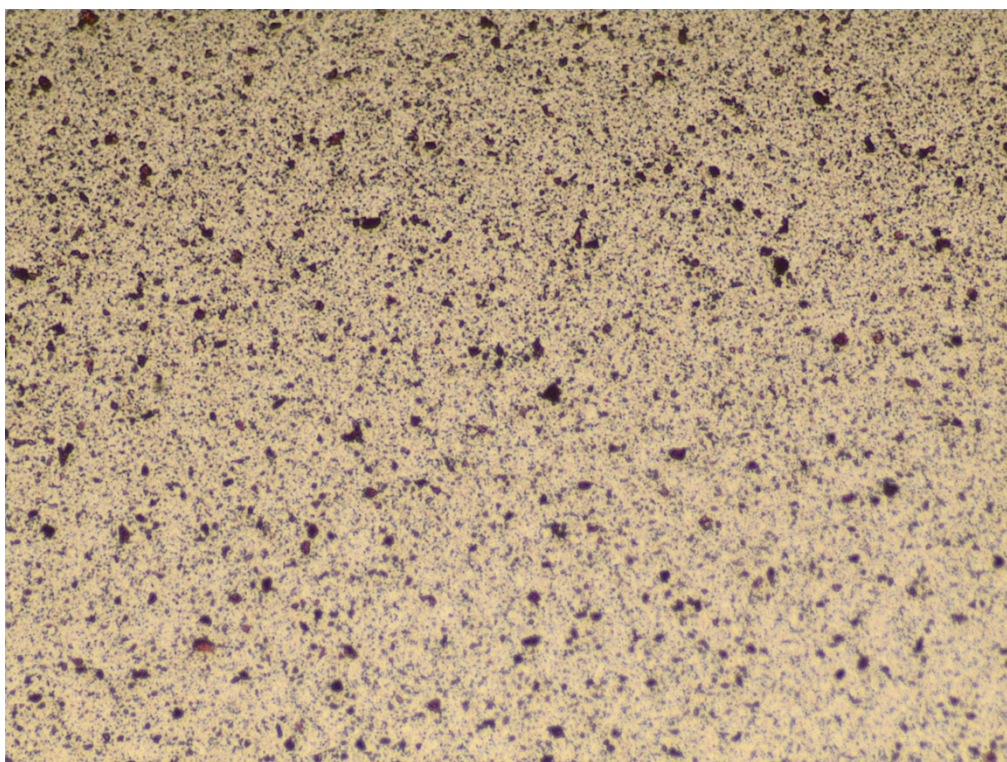

**Figure S20a:** OM image of MMM-5\*, micrograph no.2



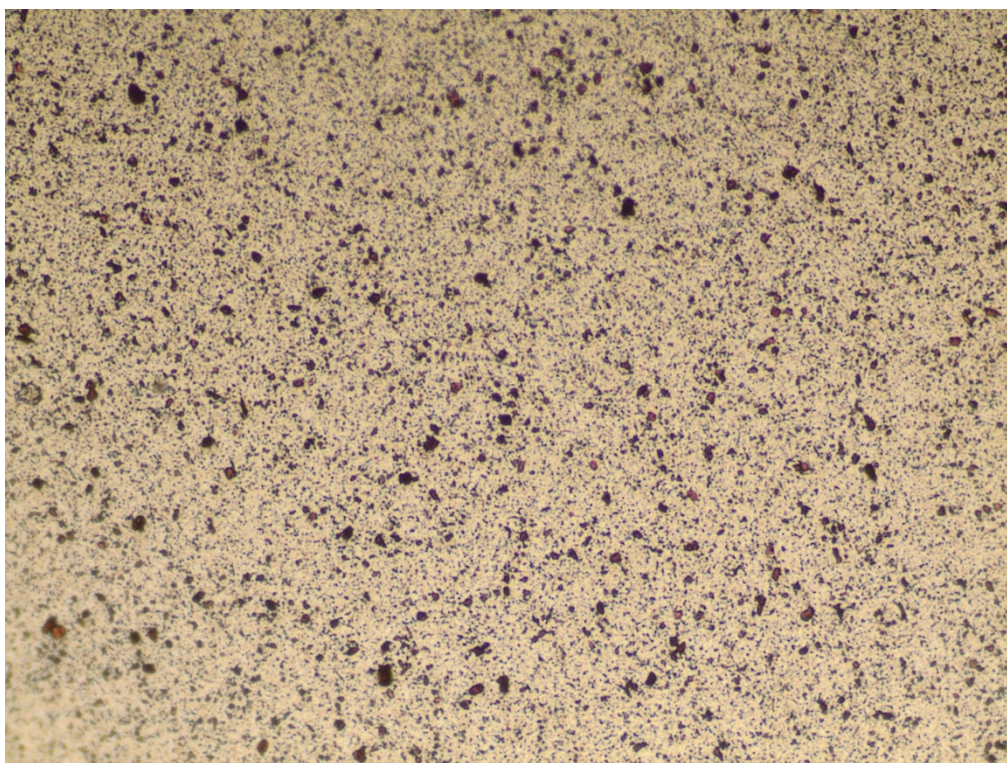

**Figure S21a:** OM image of MMM-5\*, micrograph no.3

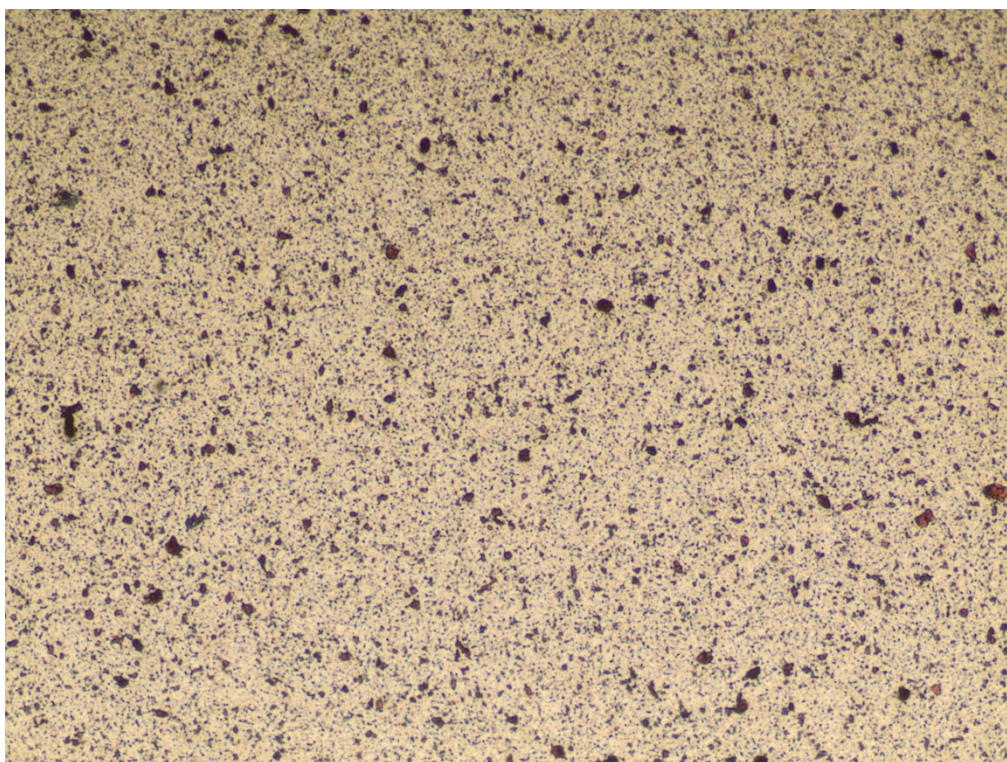

**Figure S22a:** OM image of MMM-5\*, micrograph no.4



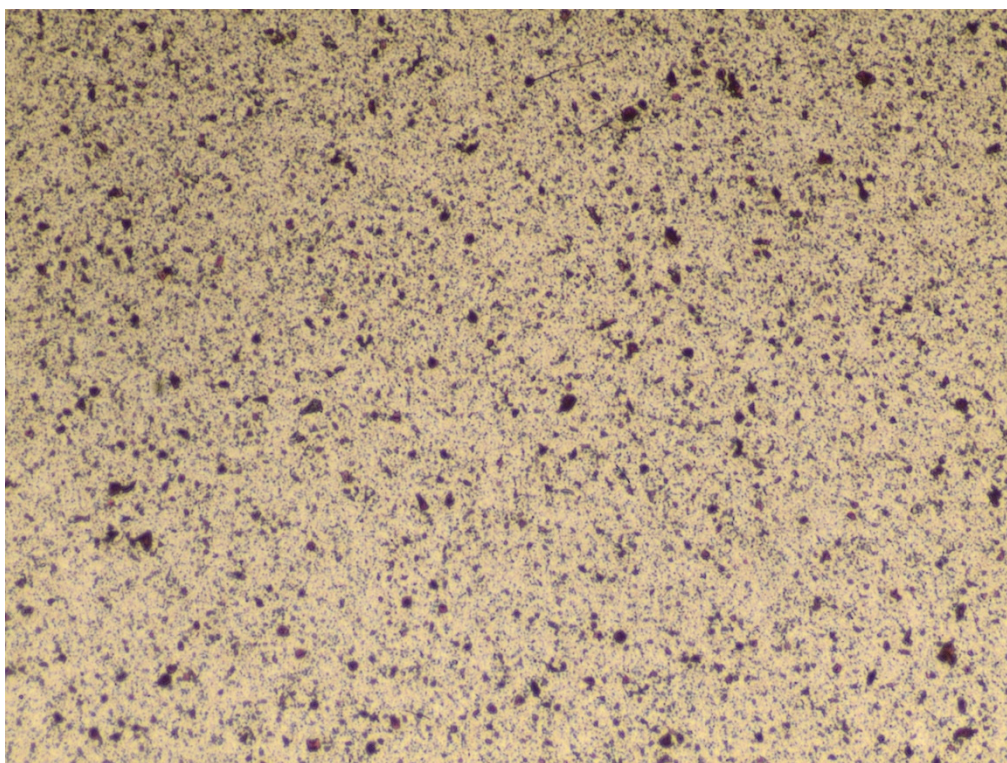

**Figure S23a:** OM image of MMM-5\*, micrograph no.5

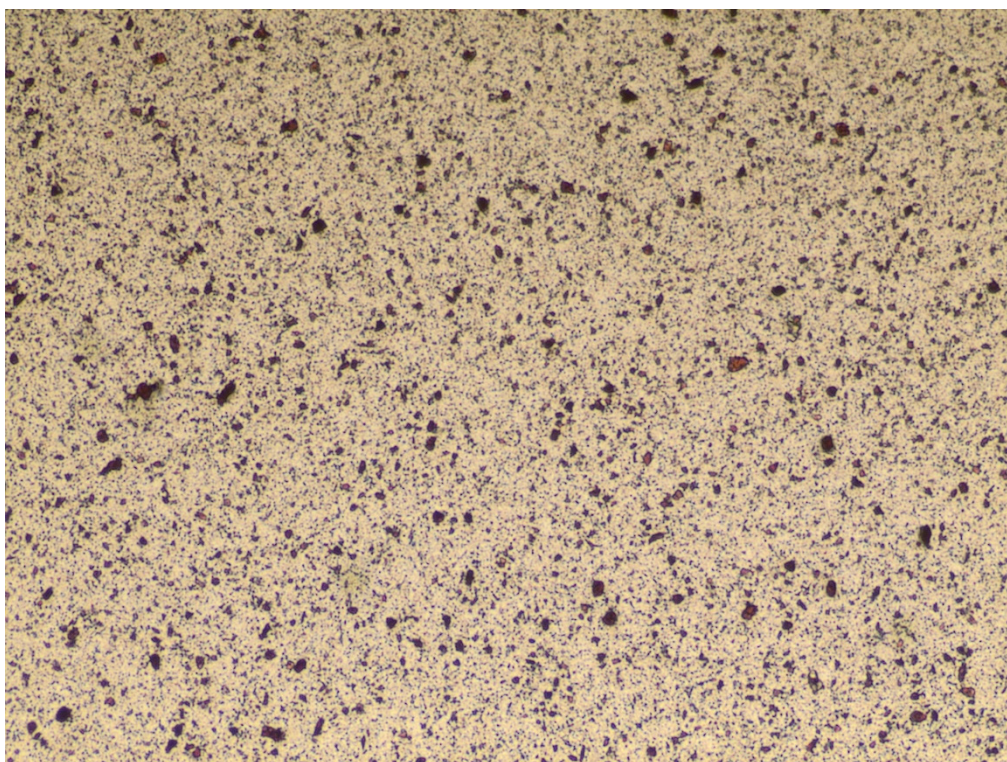

**Figure S24a:** OM image of MMM-5\*, micrograph no.6



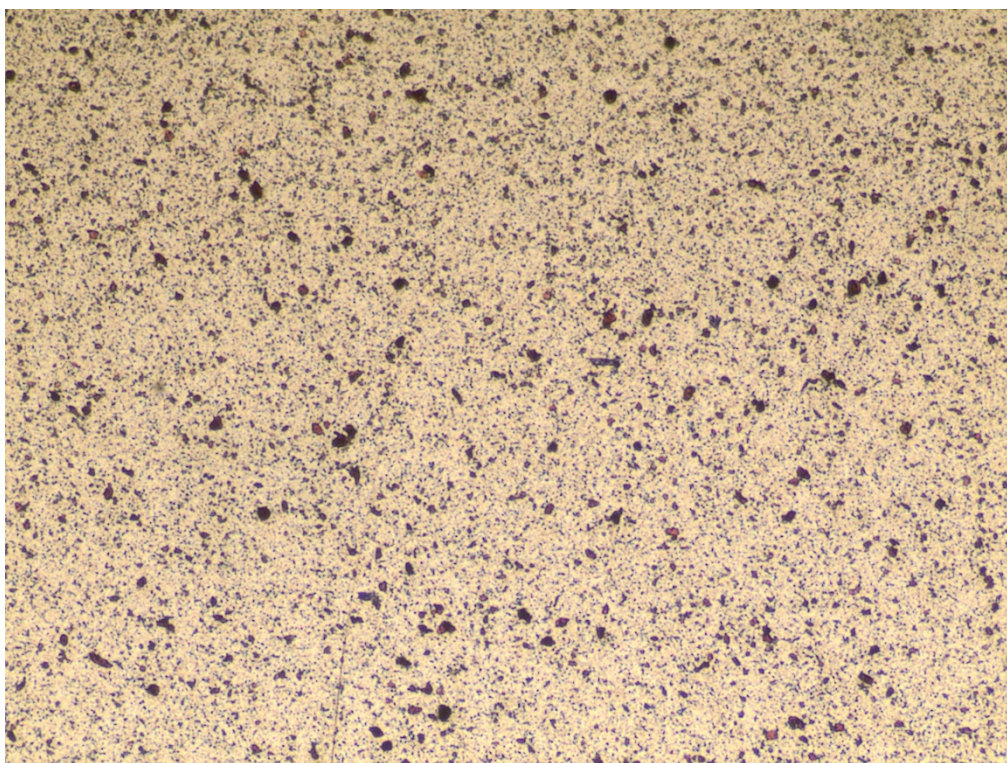

**Figure S25a:** OM image of MMM-5\*, micrograph no.7

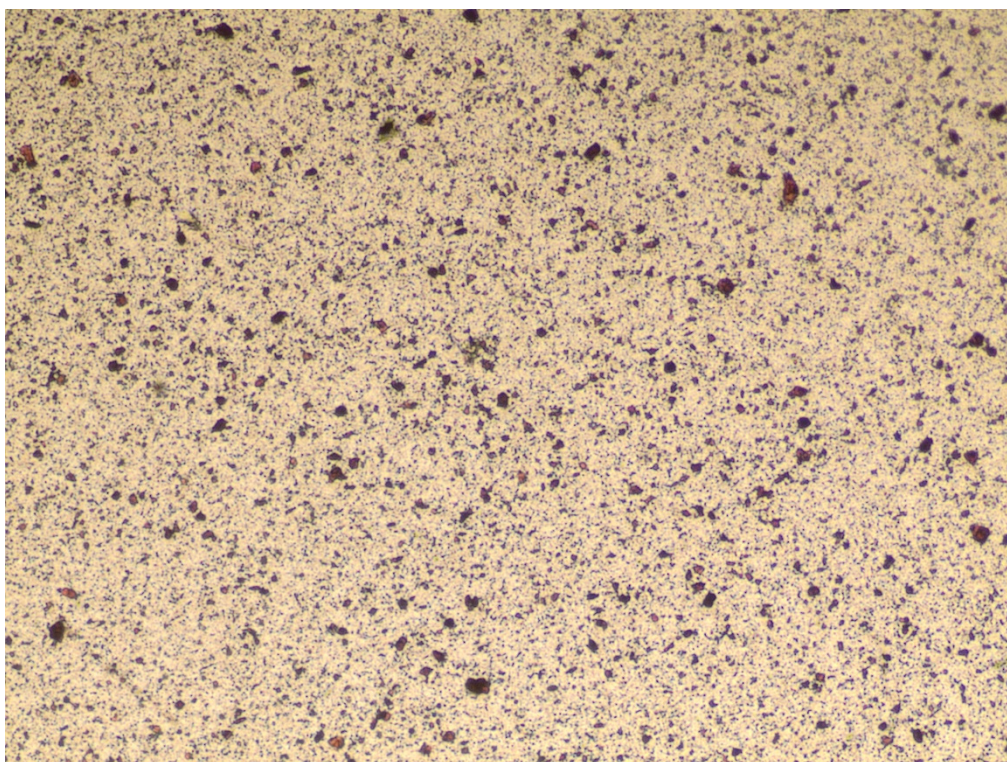

**Figure S26a:** OM image of MMM-5\*, micrograph no.8



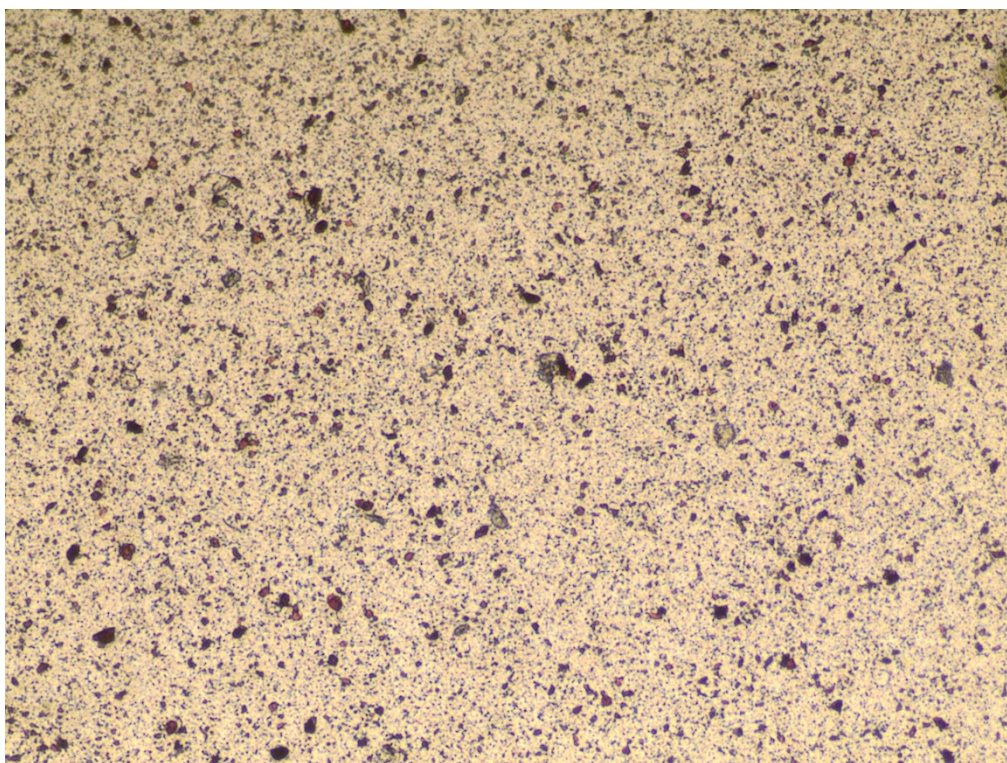

**Figure S27a:** OM image of MMM-5\*, micrograph no.9

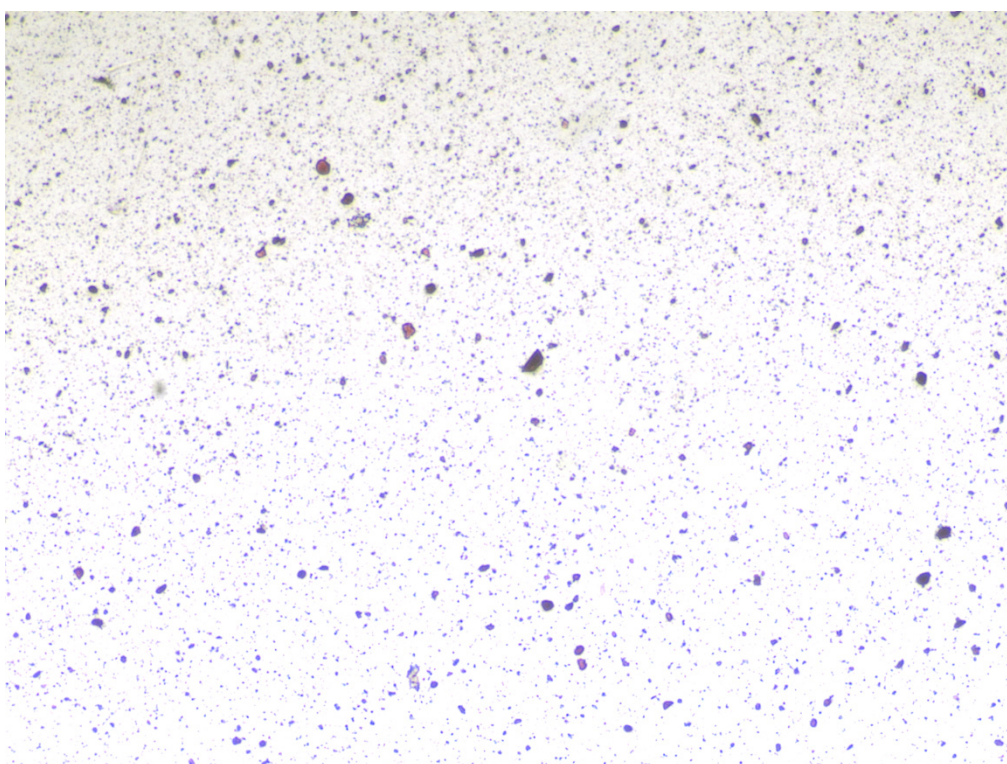

**Figure S28a:** OM image of MMM-1, micrograph no.1



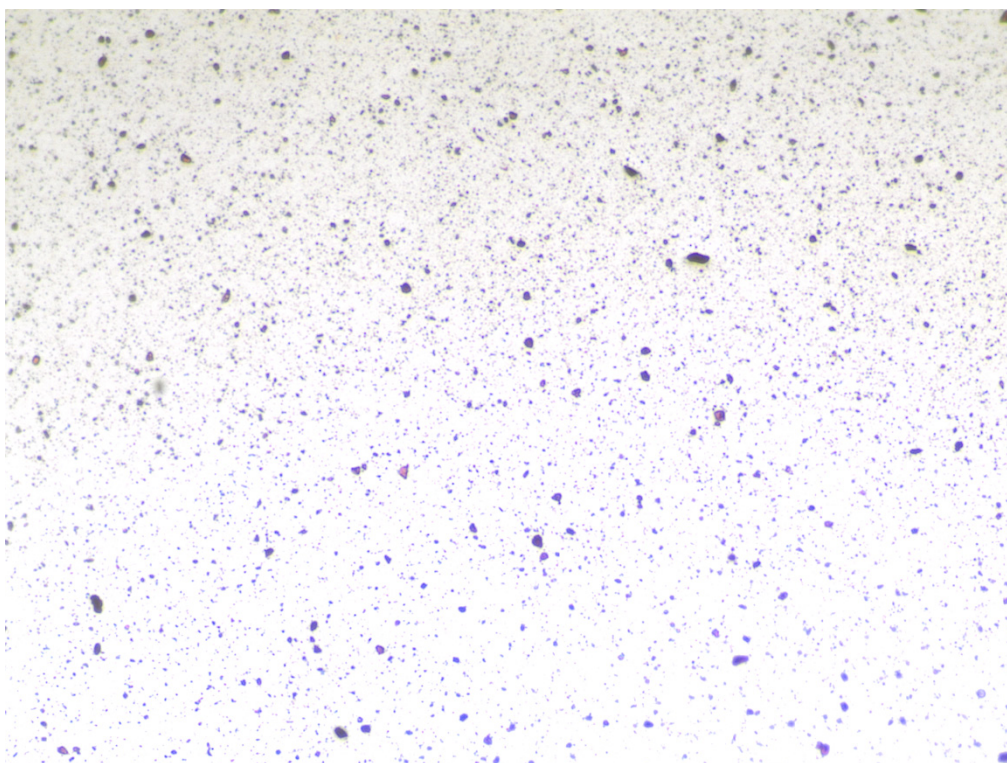

**Figure S29a:** OM image of MMM-1, micrograph no.2

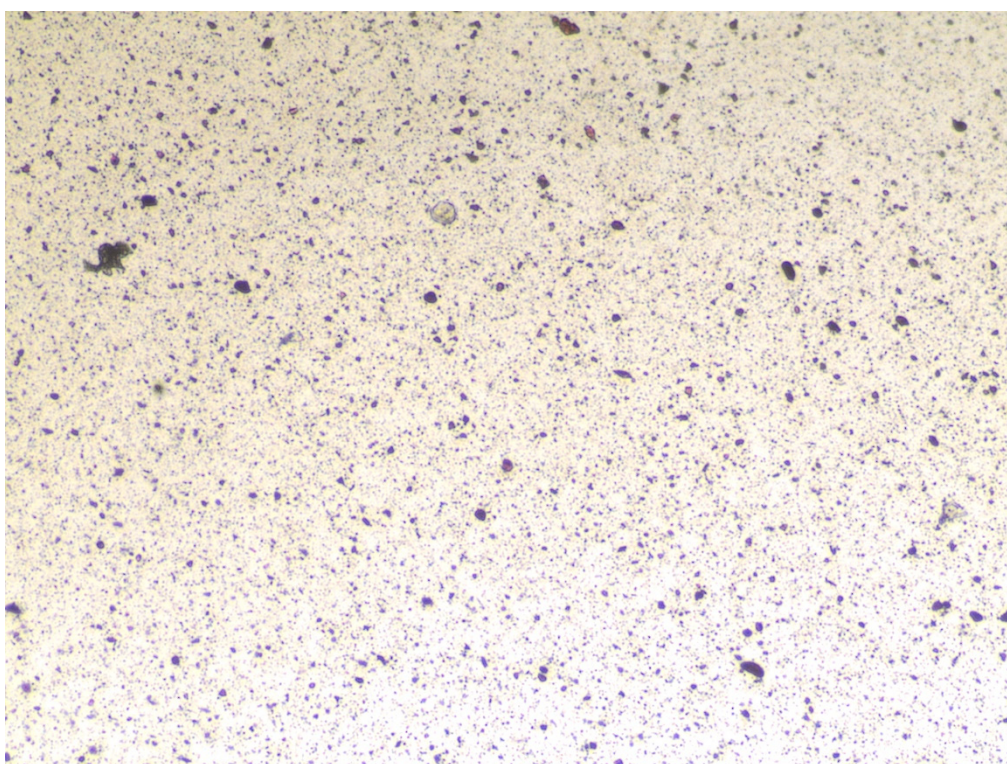

**Figure S30a:** OM image of MMM-1, micrograph no.3



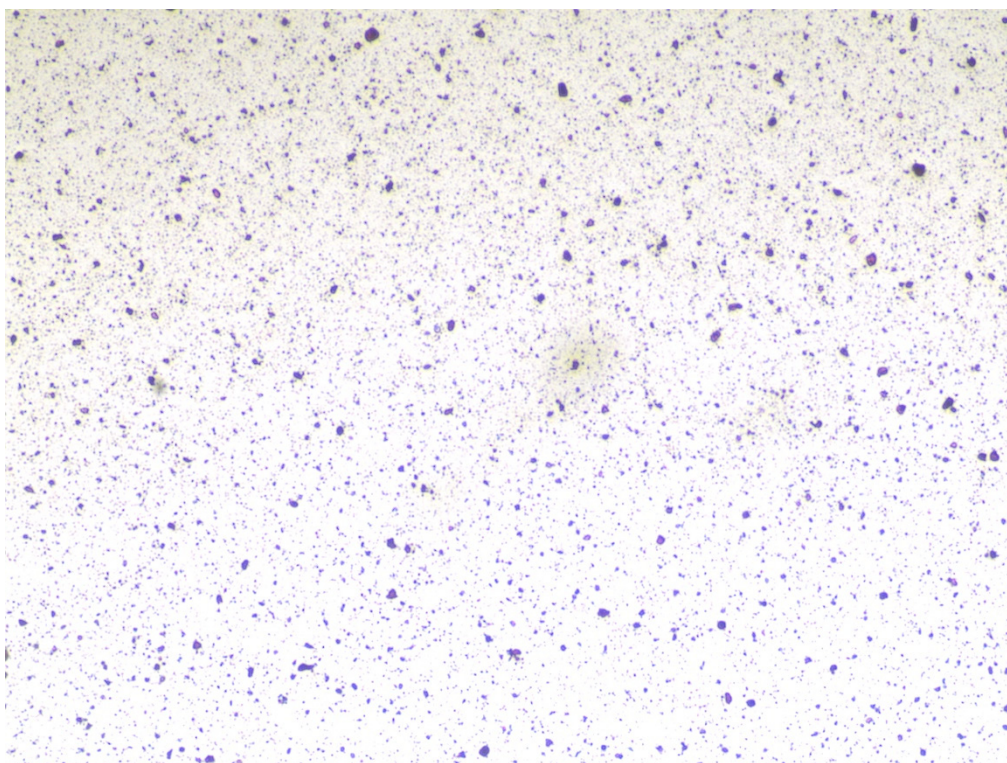

**Figure S31a:** OM image of MMM-1, micrograph no.4

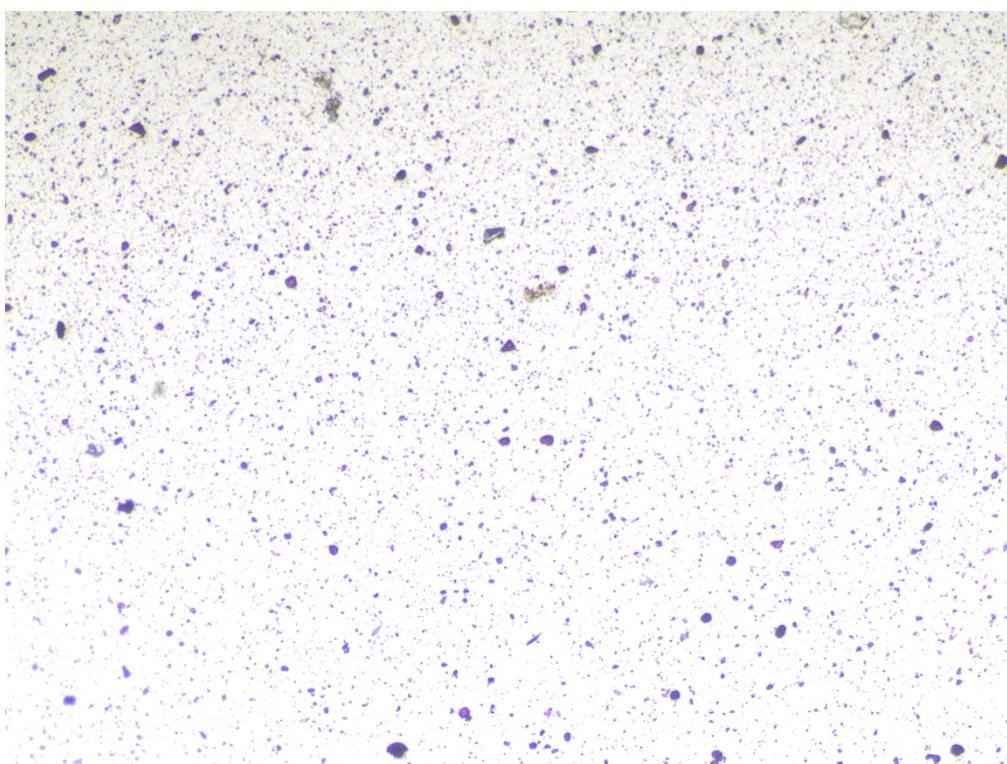

**Figure S32a:** OM image of MMM-1, micrograph no.5



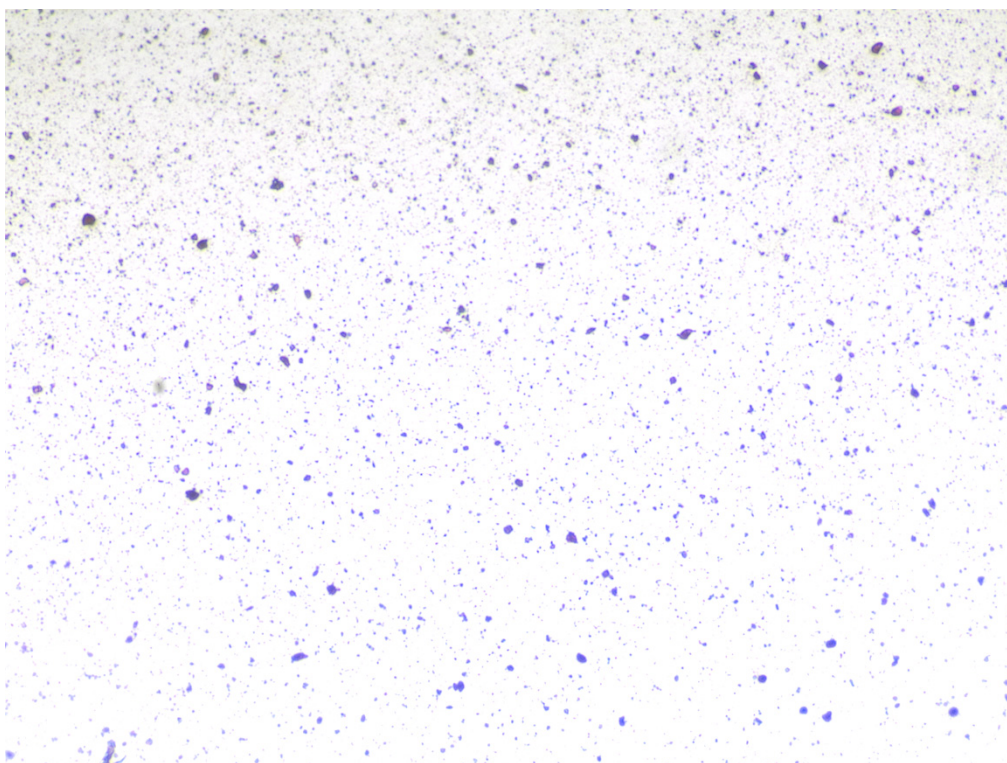

**Figure S33a:** OM image of MMM-1, micrograph no.6

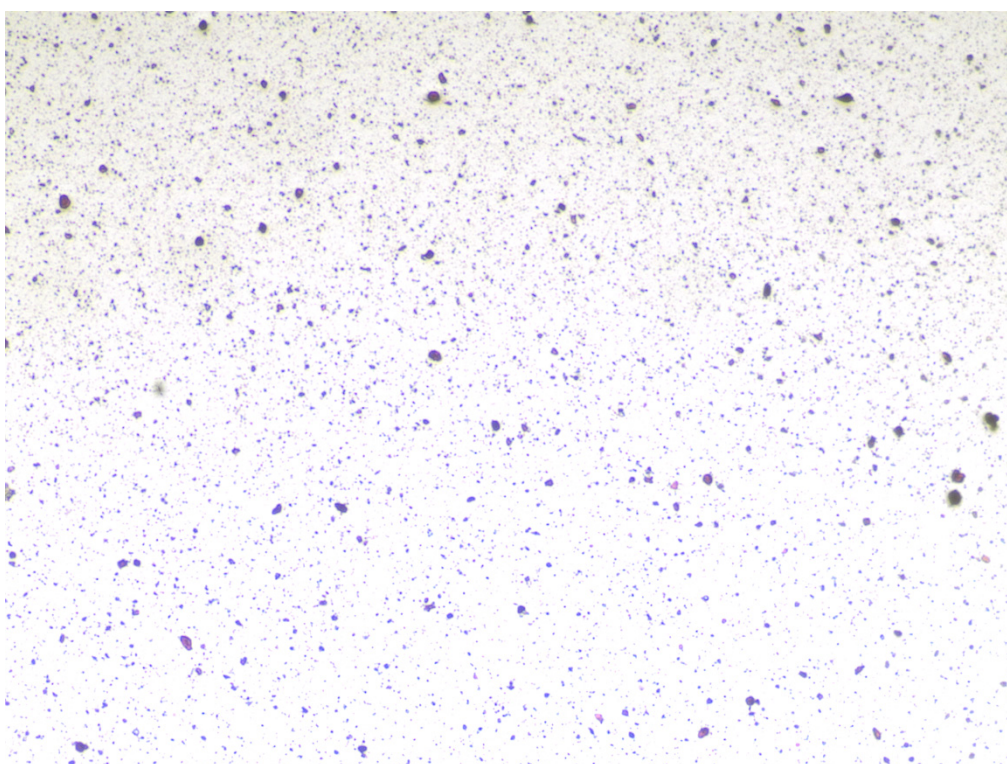

**Figure S34a:** OM image of MMM-1, micrograph no.7



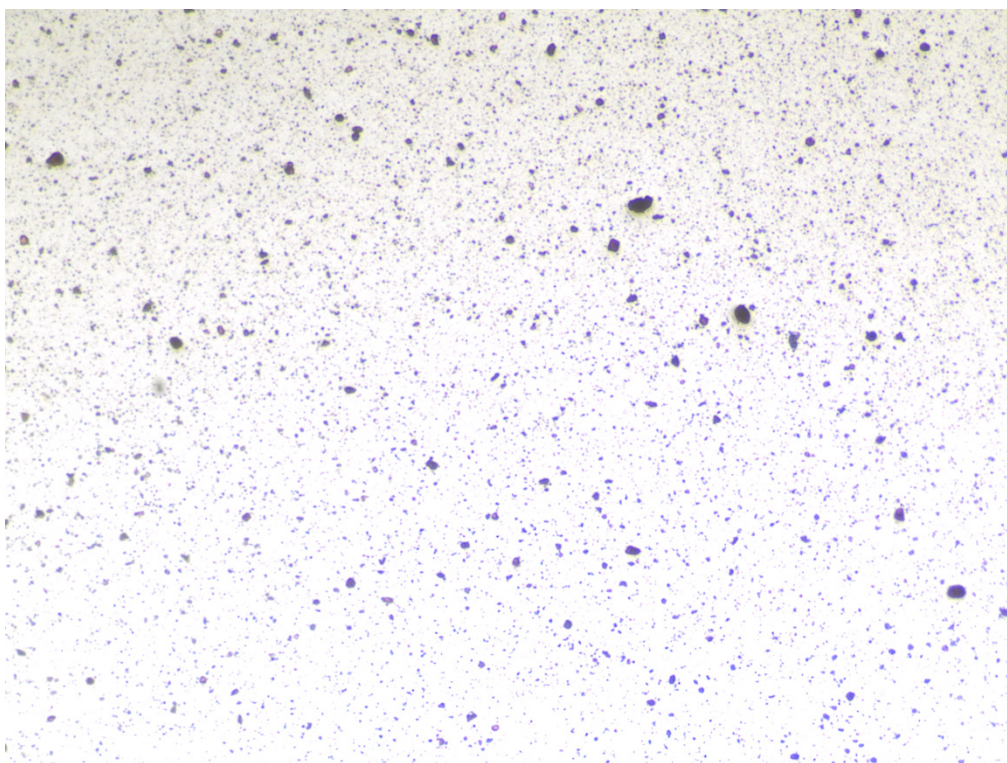

**Figure S35a:** OM image of MMM-1, micrograph no.8

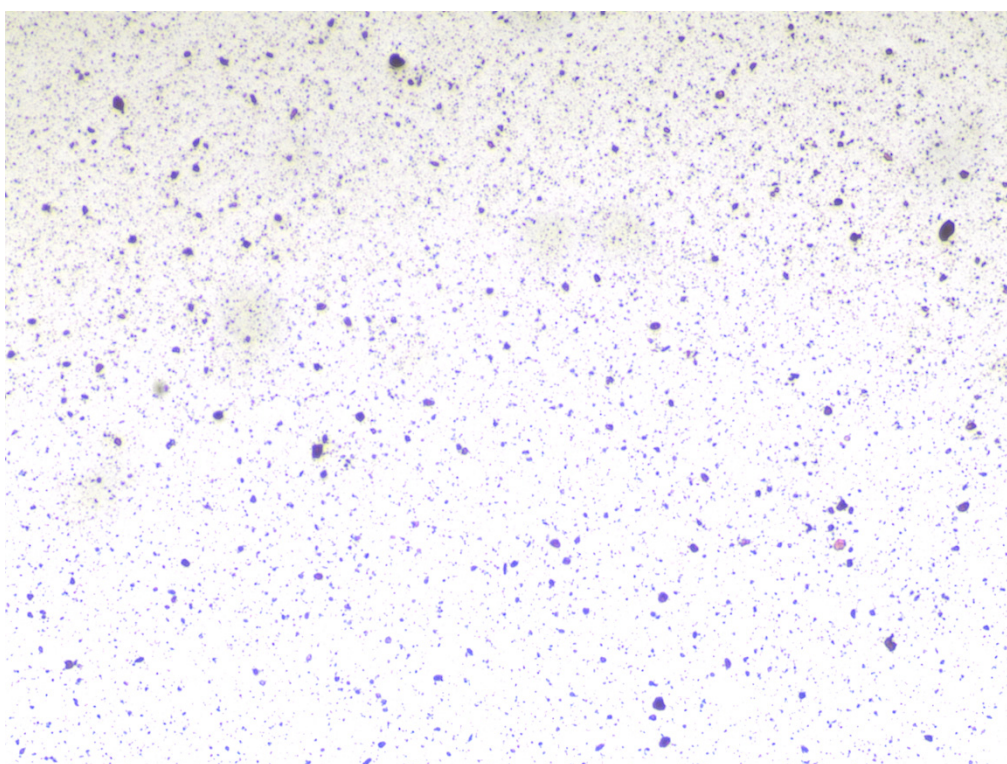

**Figure S36a:** OM image of MMM-1, micrograph no.9



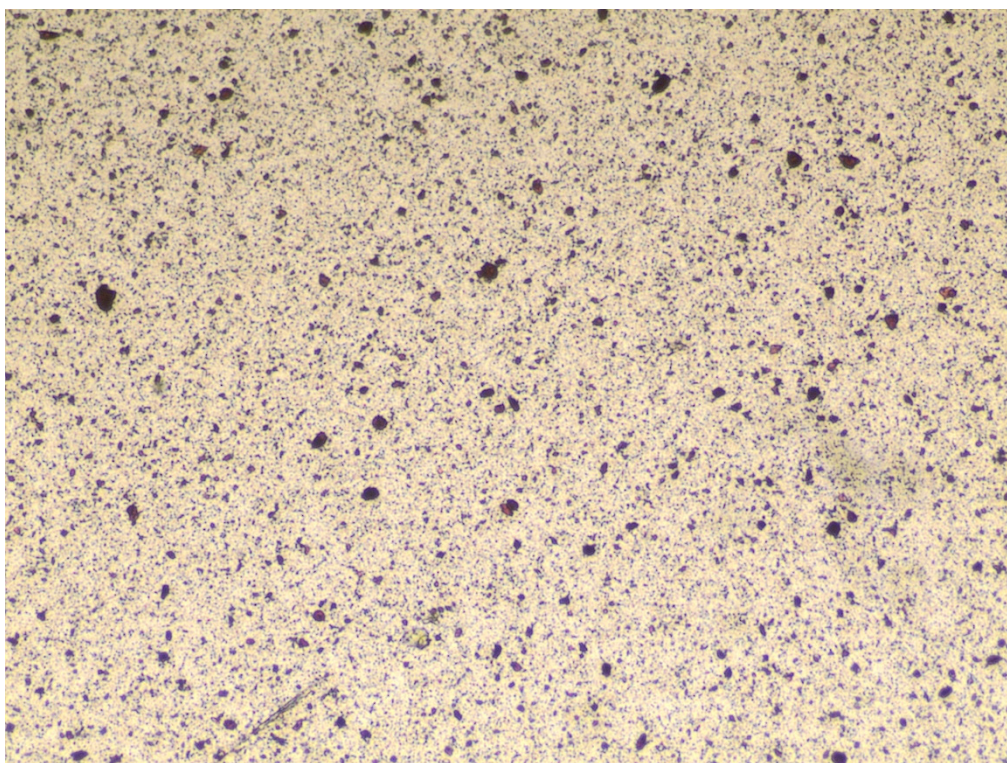

**Figure S37a:** OM image of MMM-3, micrograph no.1

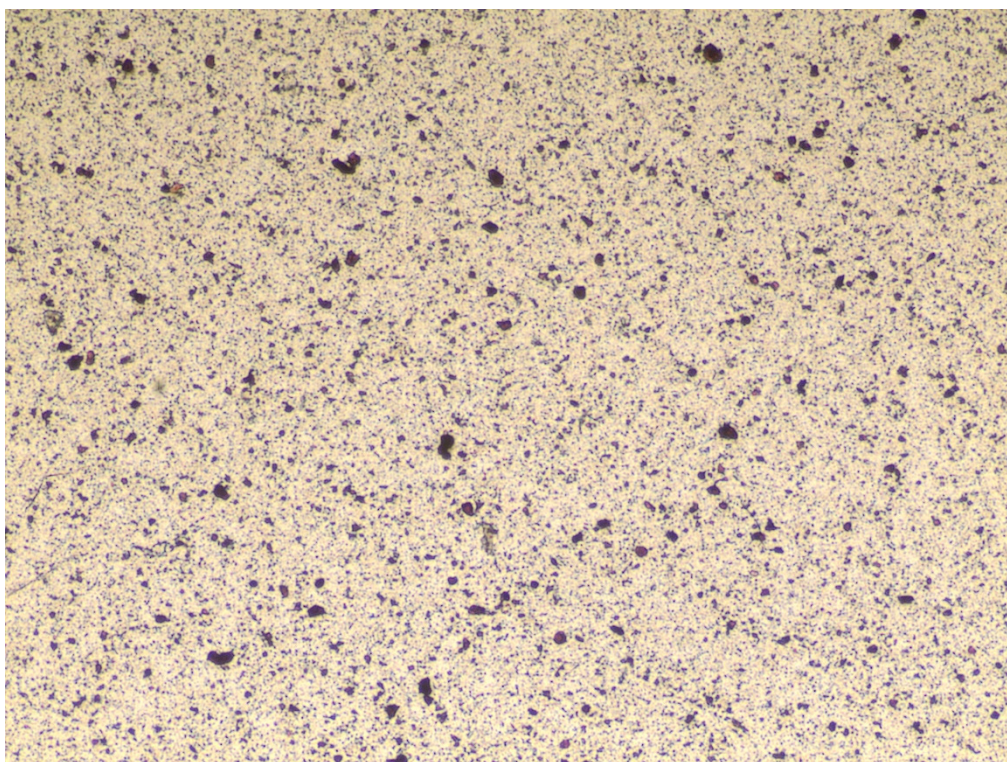

**Figure S38a:** OM image of MMM-3, micrograph no.2



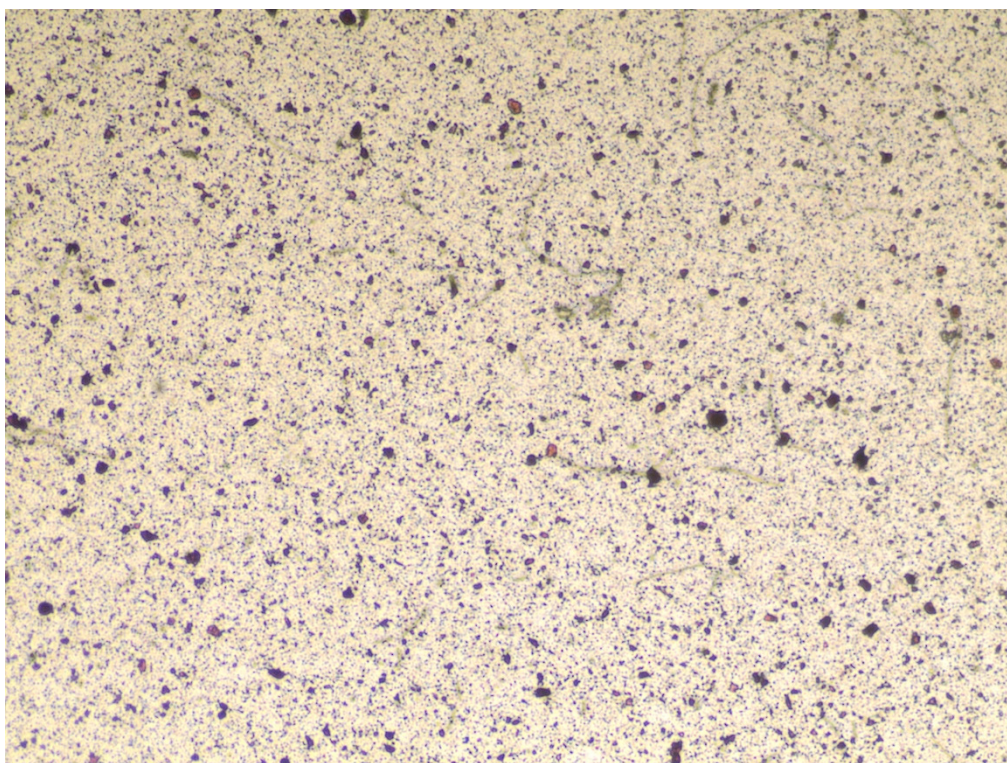

**Figure S39a:** OM image of MMM-3, micrograph no.3

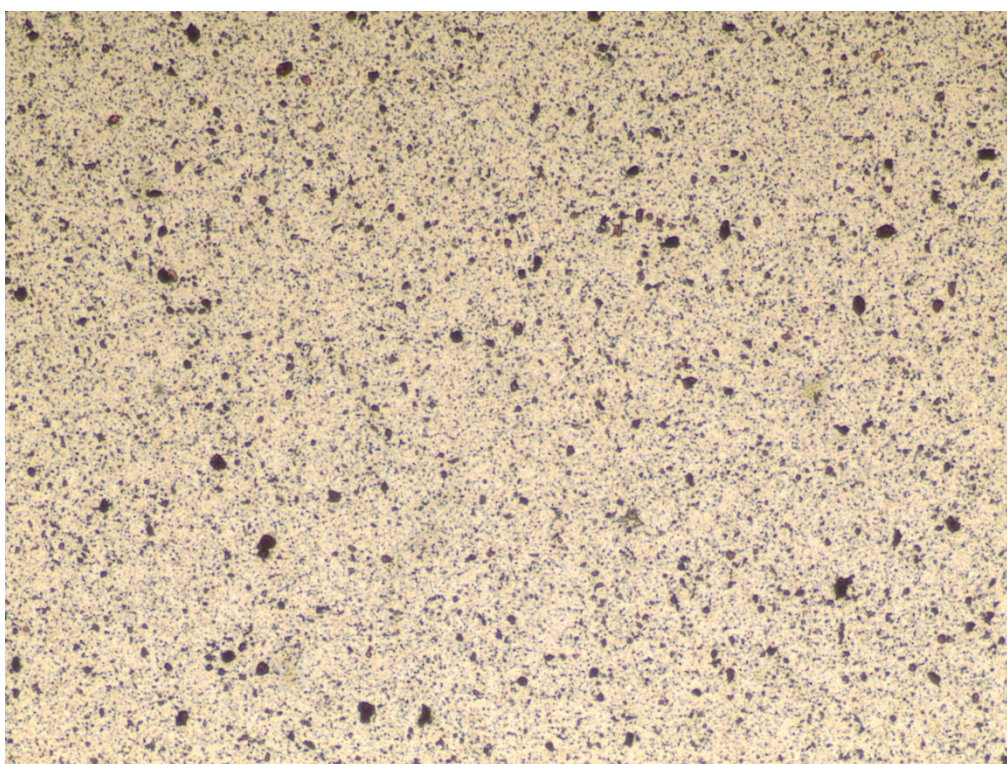

**Figure S40a:** OM image of MMM-3, micrograph no.4



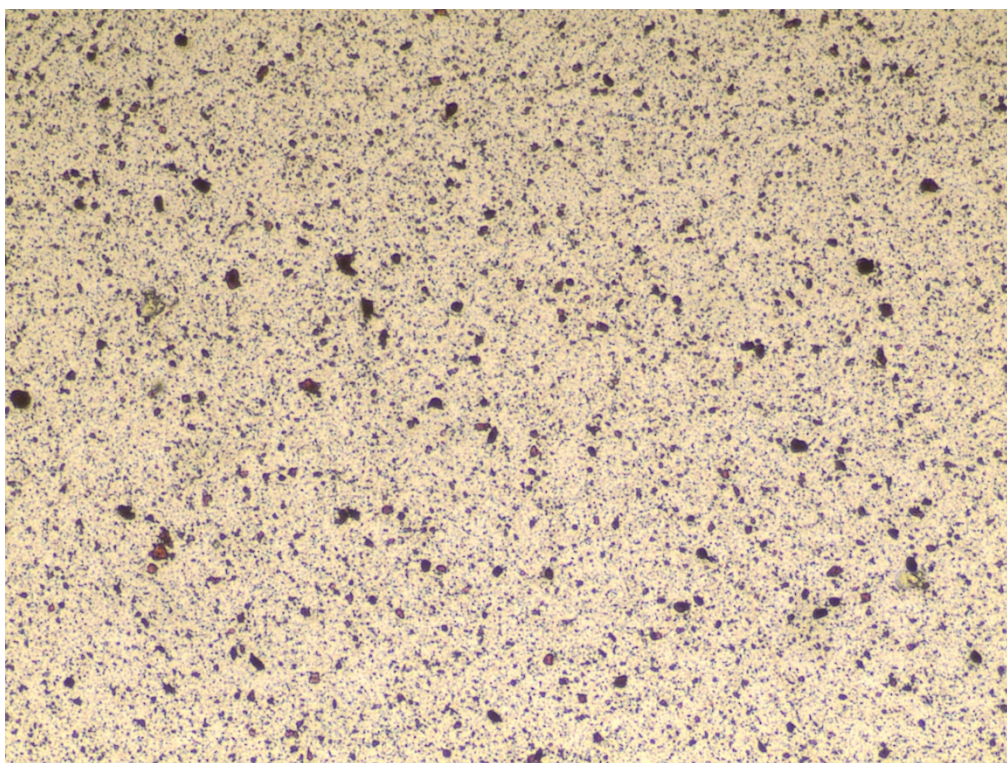

**Figure S41a:** OM image of MMM-3, micrograph no.5

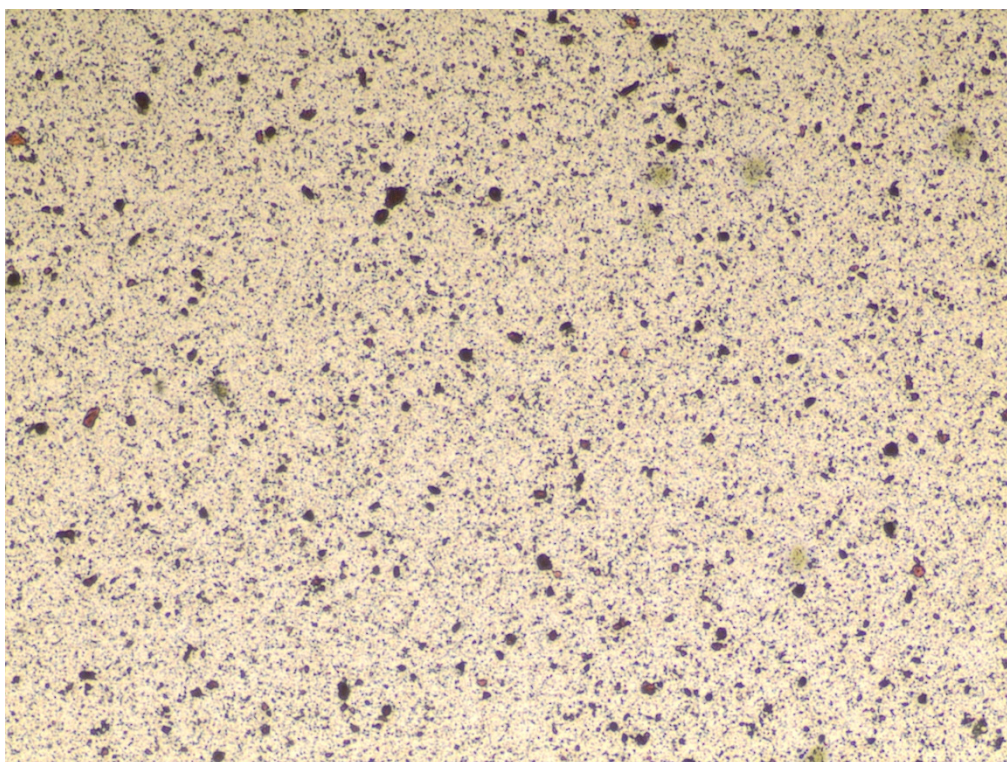

**Figure S42a:** OM image of MMM-3, micrograph no.6



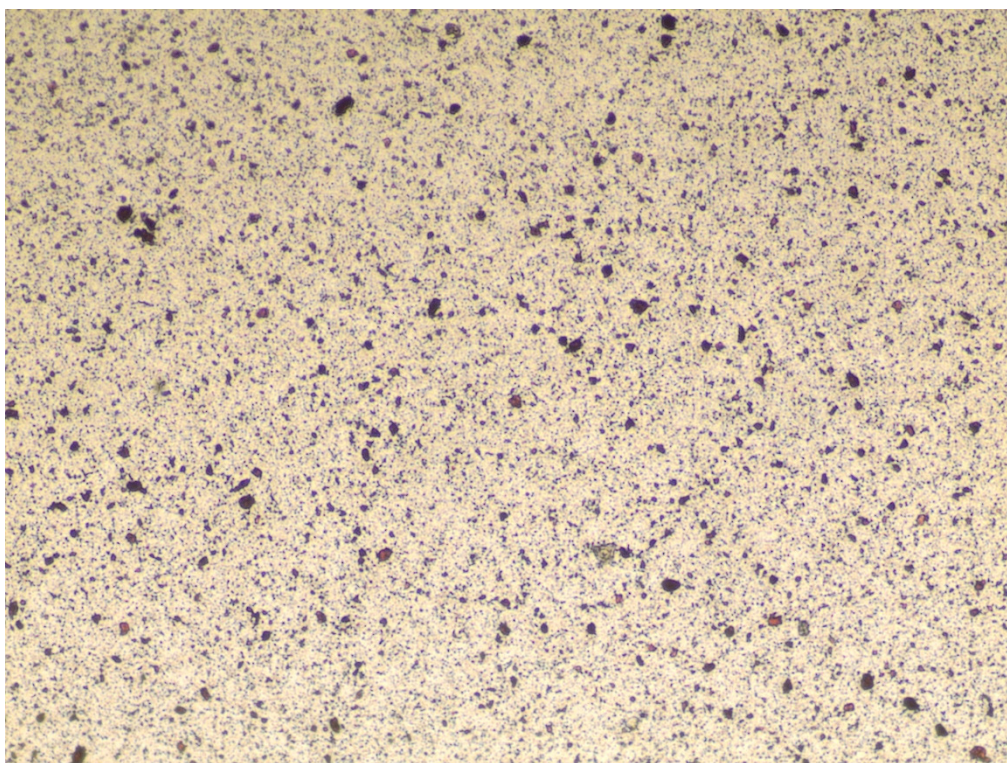

**Figure S43a:** OM image of MMM-3, micrograph no.7

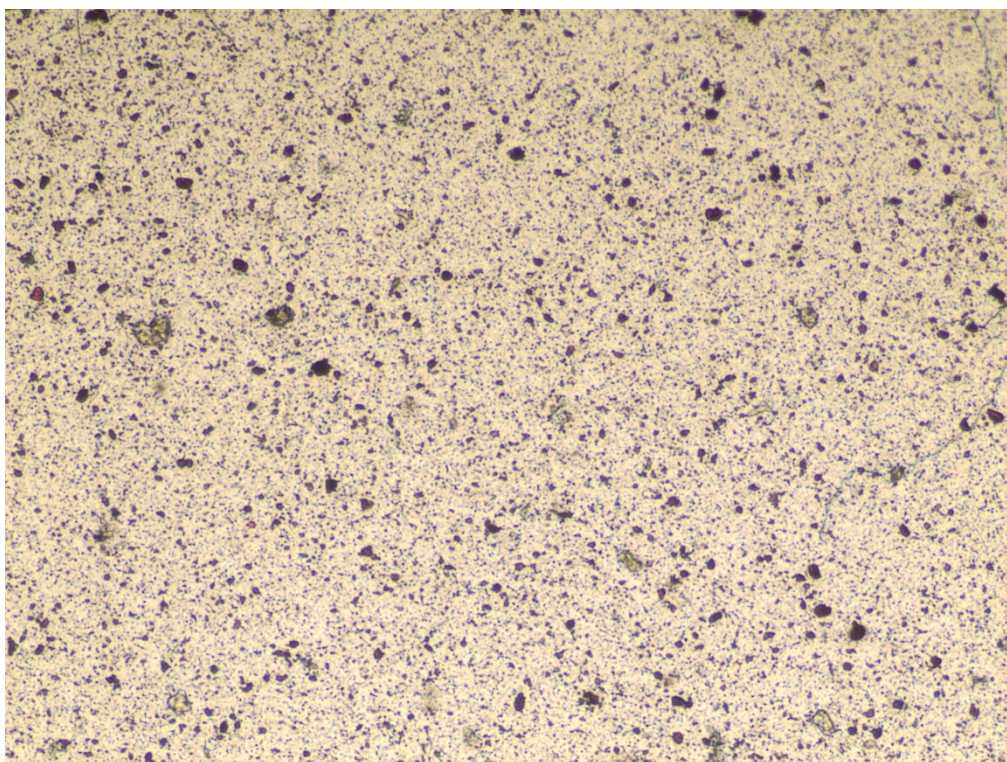

**Figure S44a:** OM image of MMM-3, micrograph no.8



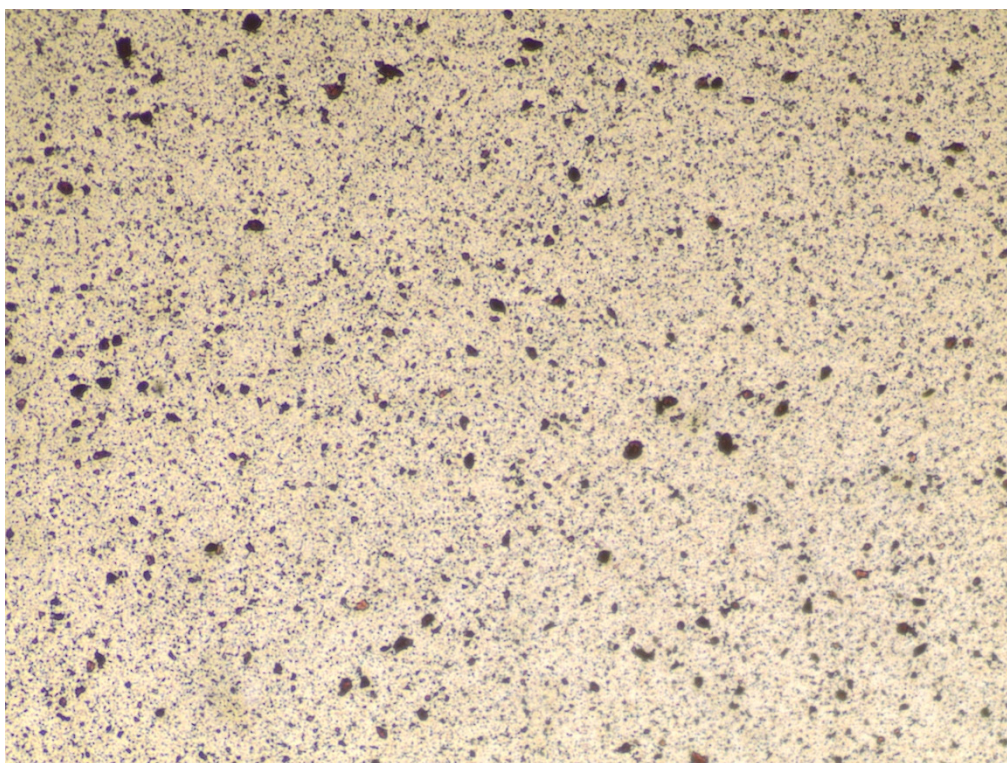

**Figure S45a:** OM image of MMM-3, micrograph no.9

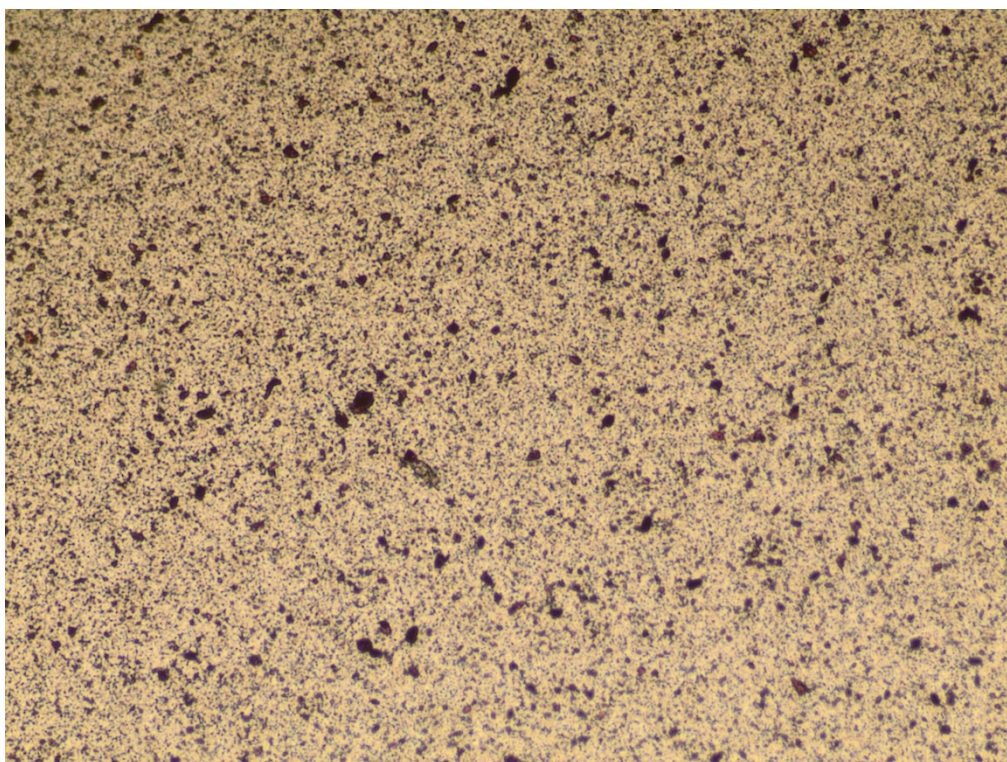

**Figure S46a:** OM image of MMM-5, micrograph no.1



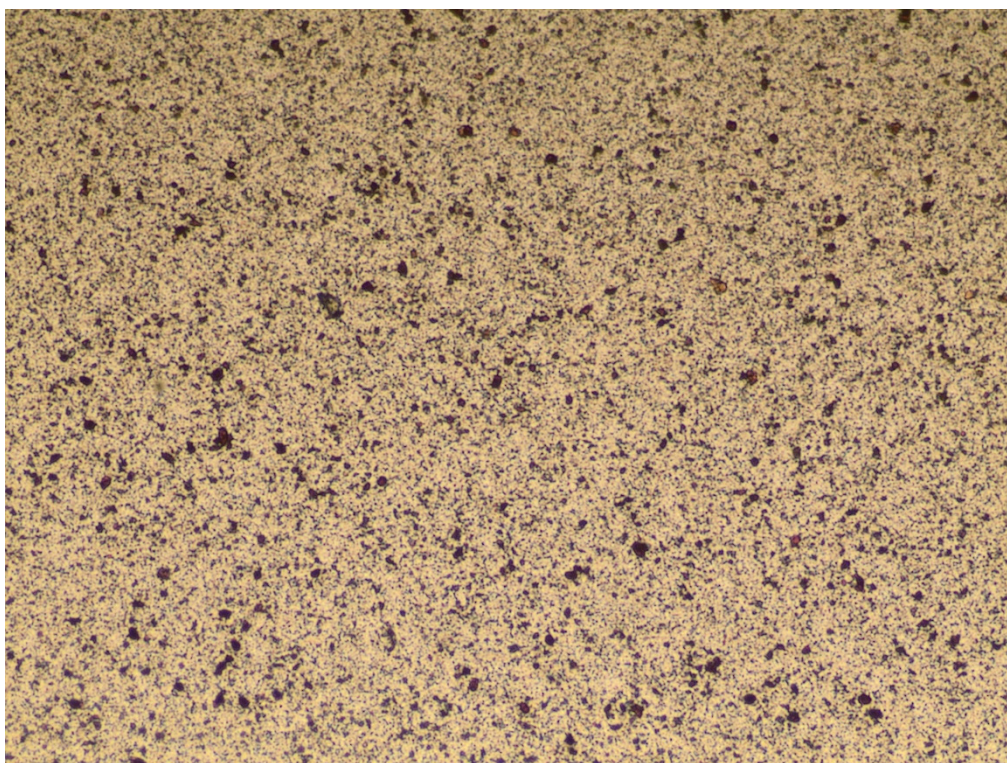

**Figure S47a:** OM image of MMM-5, micrograph no.2

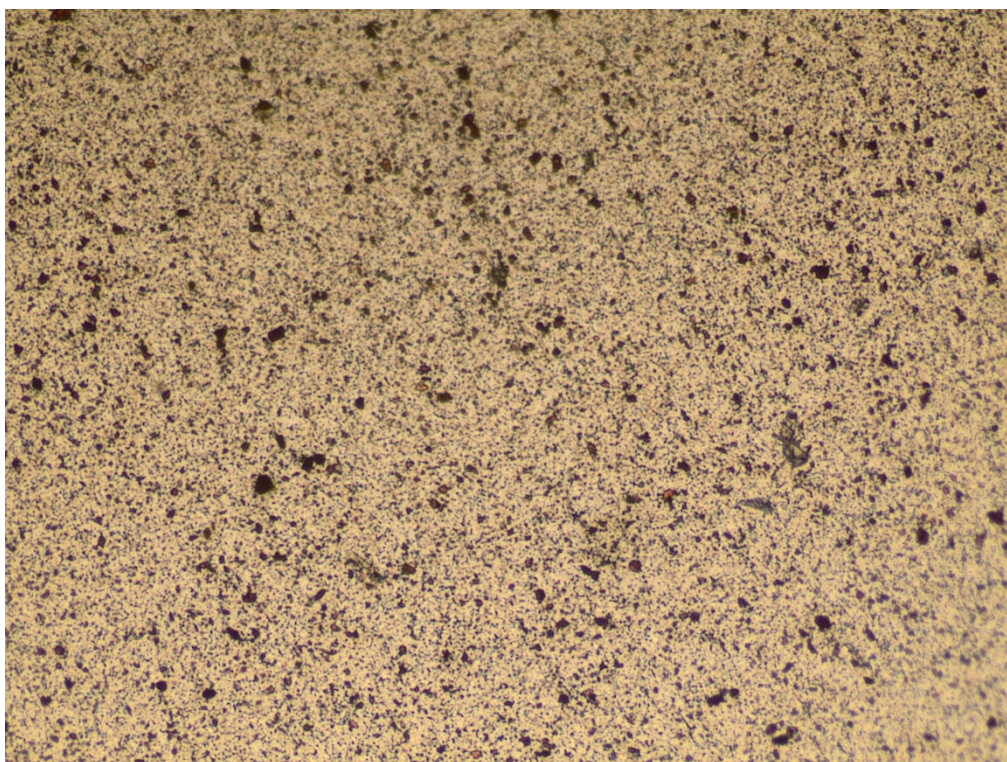

**Figure S48a:** OM image of MMM-5, micrograph no.3



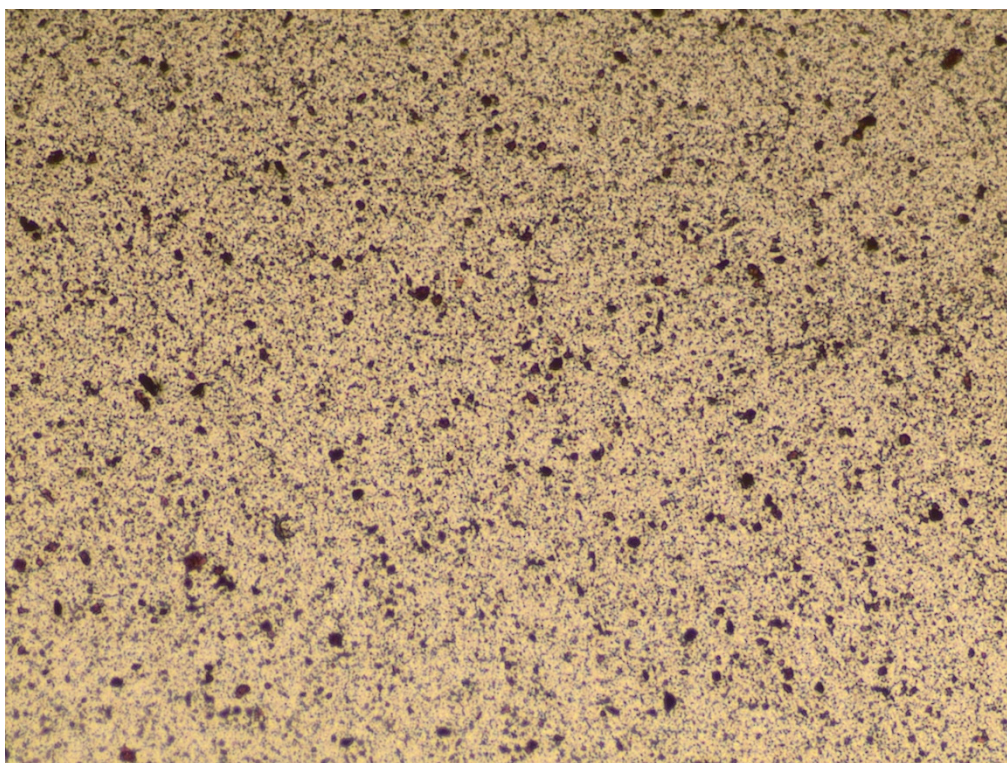

**Figure S49a:** OM image of MMM-5, micrograph no.4

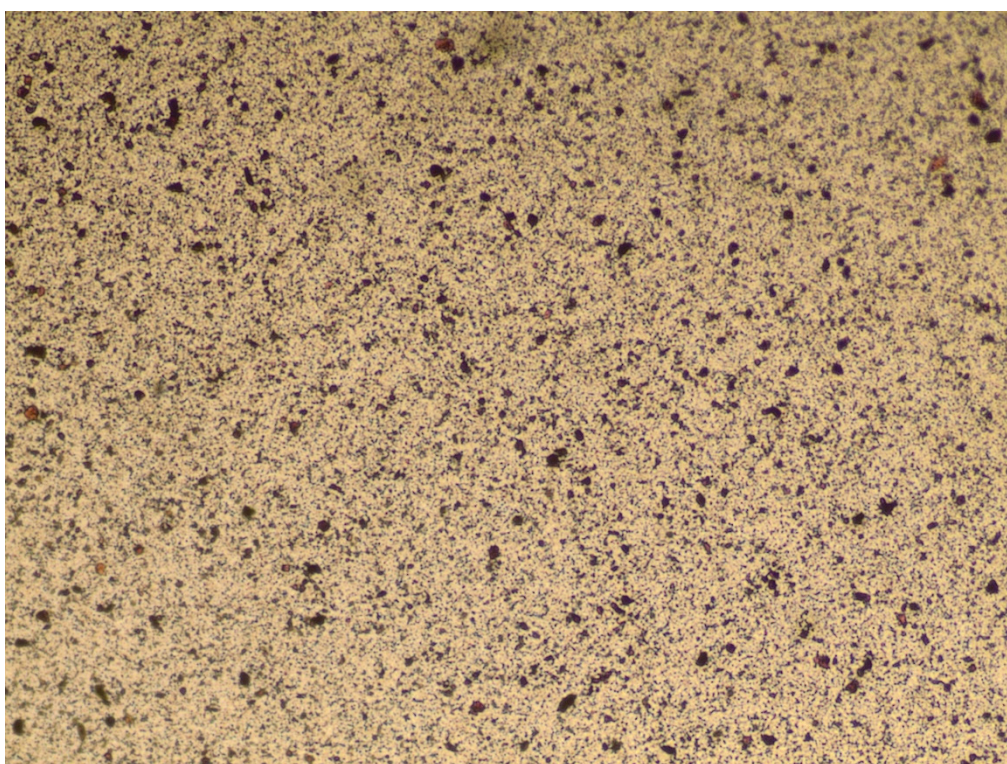

**Figure S50a:** OM image of MMM-5, micrograph no.5



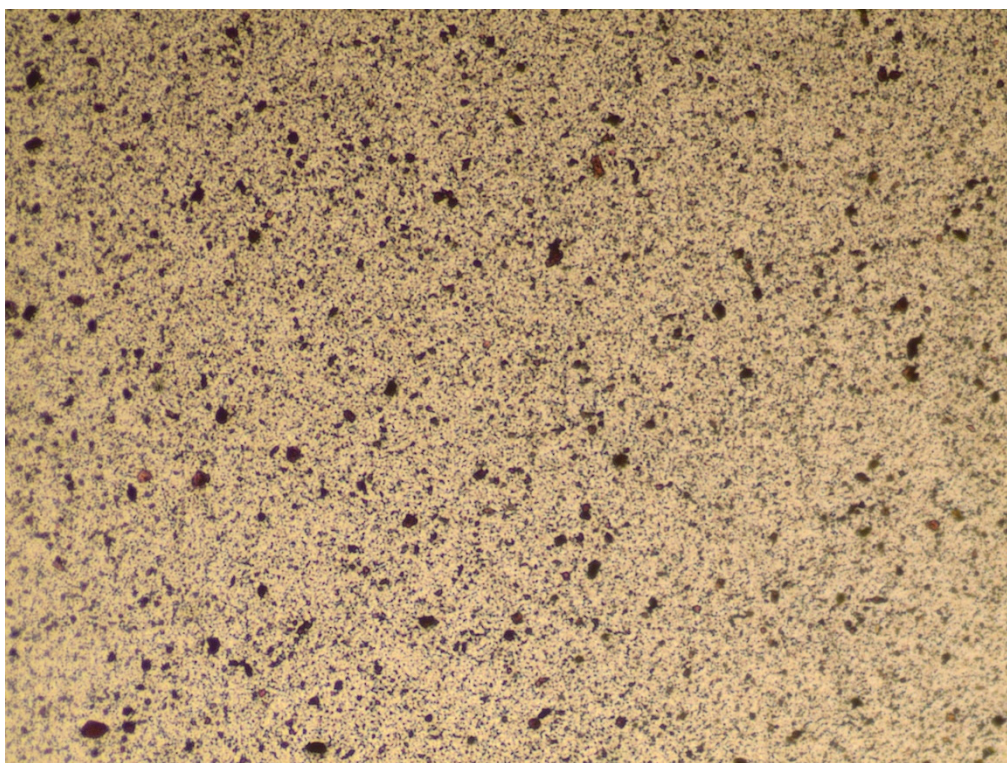

**Figure S51a:** OM image of MMM-5, micrograph no.6

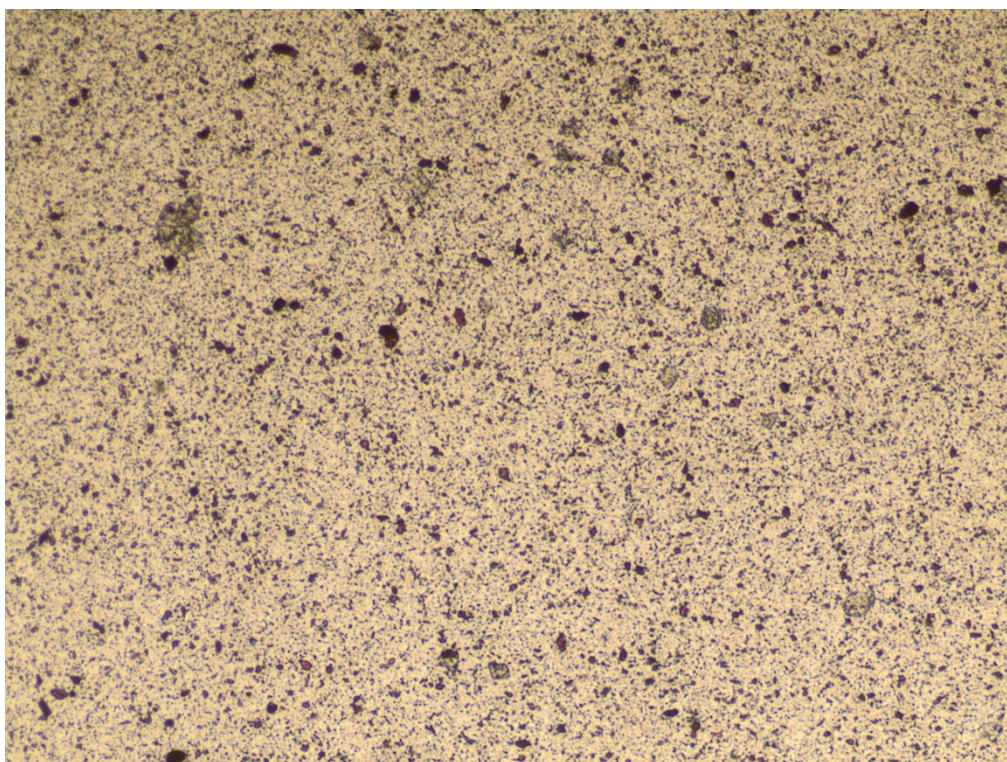

**Figure S52a:** OM image of MMM-5, micrograph no.7



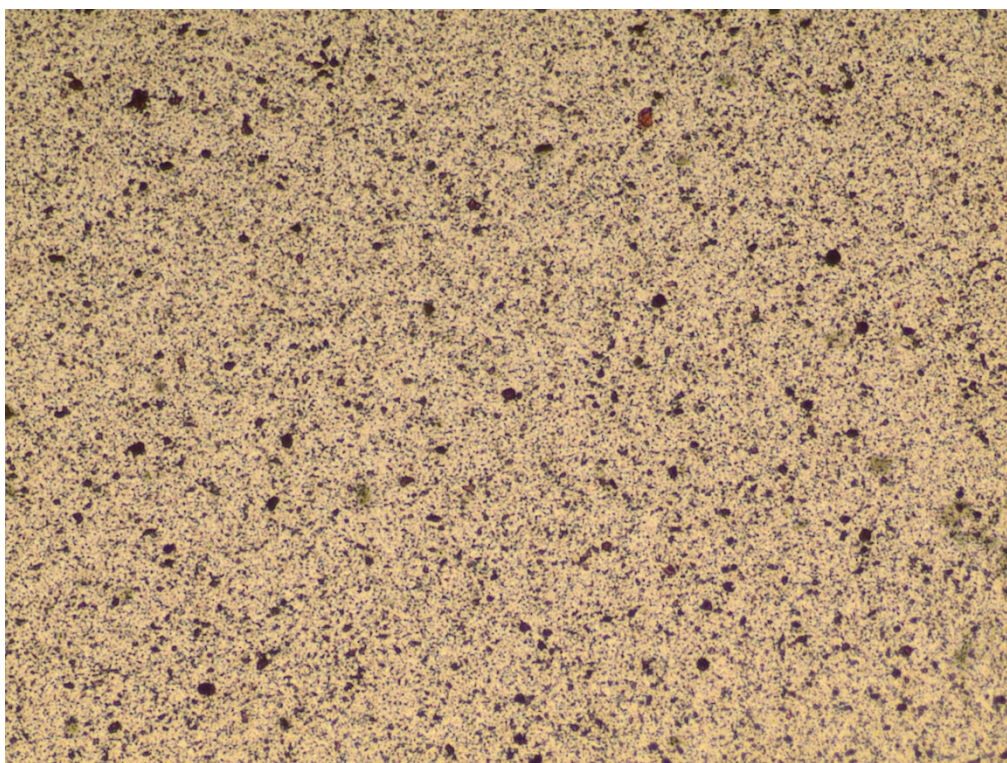

**Figure S53a:** OM image of MMM-5, micrograph no.8

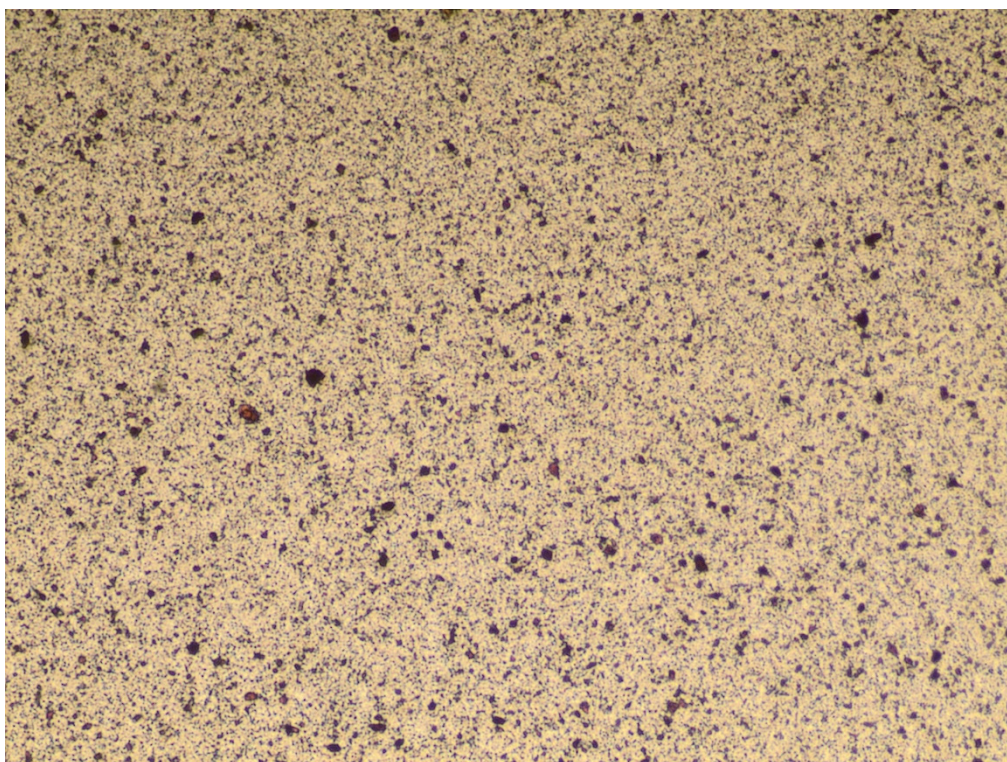

**Figure S54a:** OM image of MMM-5, micrograph no.9



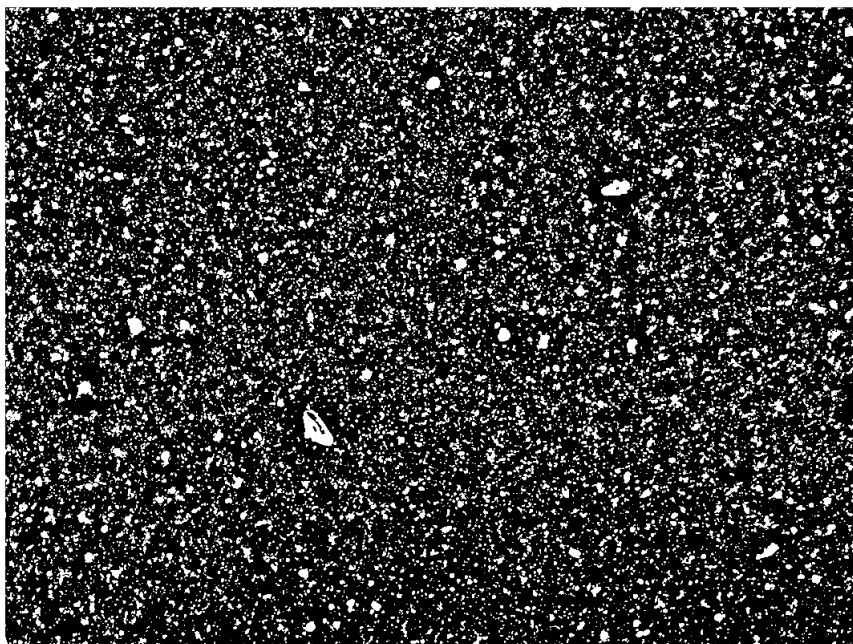

**Figure S1b:** OM image of MMM-1\*, micrograph no.1

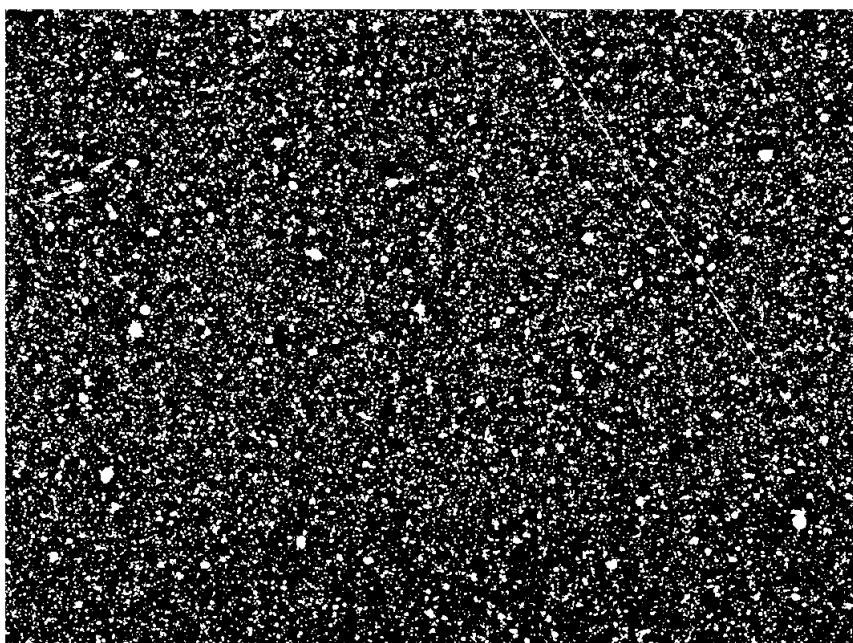

**Figure S2b:** OM image of MMM-1\*, micrograph no.2



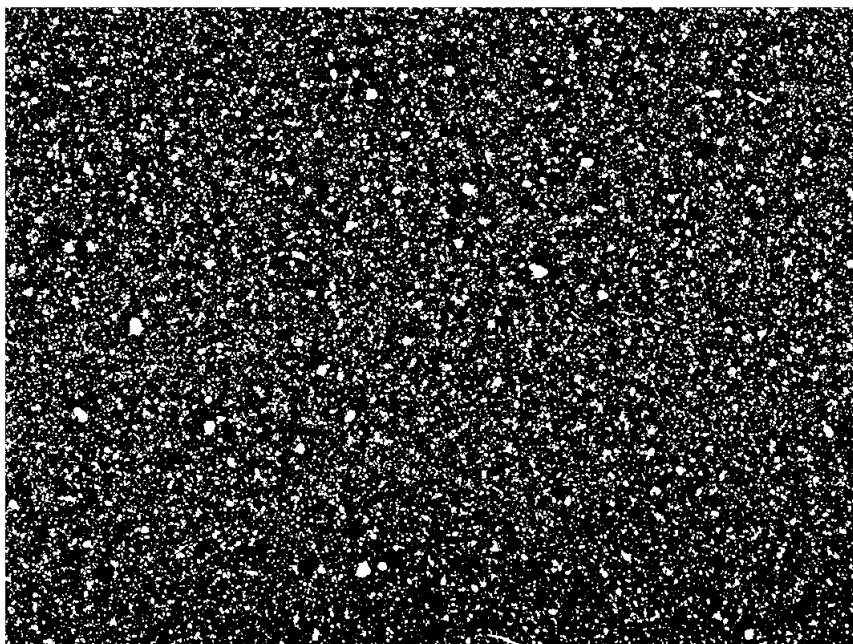

**Figure S3b:** OM image of MMM-1\*, micrograph no.3

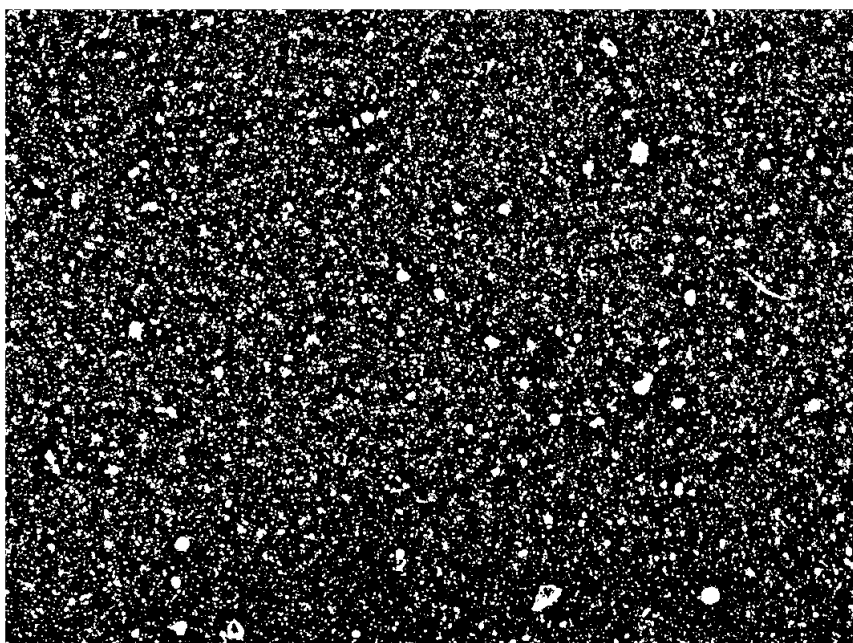

**Figure S4b:** OM image of MMM-1\*, micrograph no.4



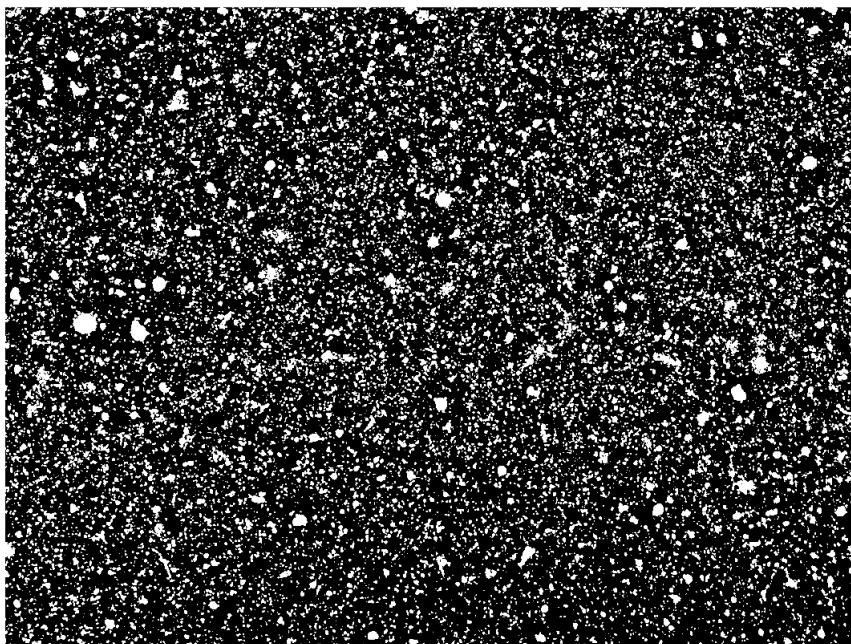

**Figure S5b:** OM image of MMM-1\*, micrograph no.5

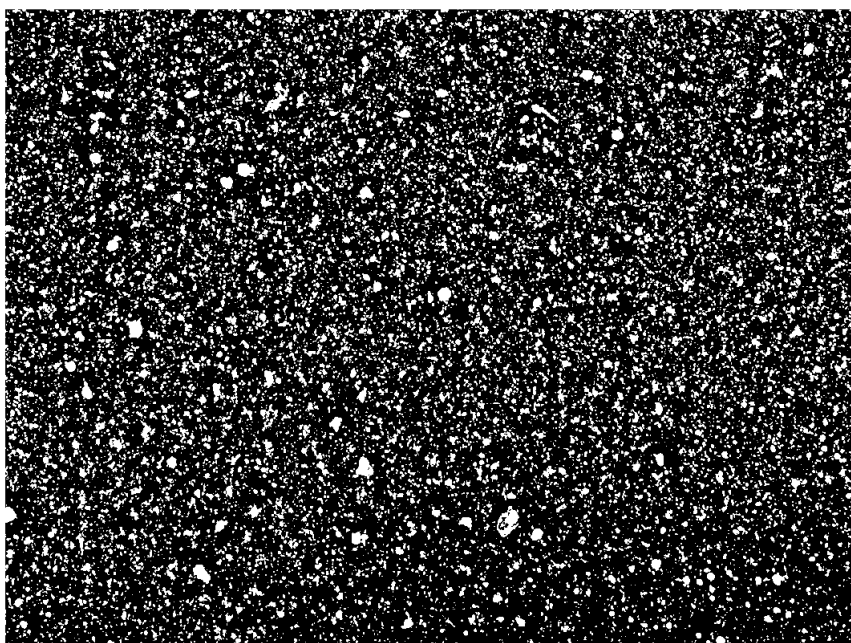

**Figure S6b:** OM image of MMM-1\*, micrograph no.6



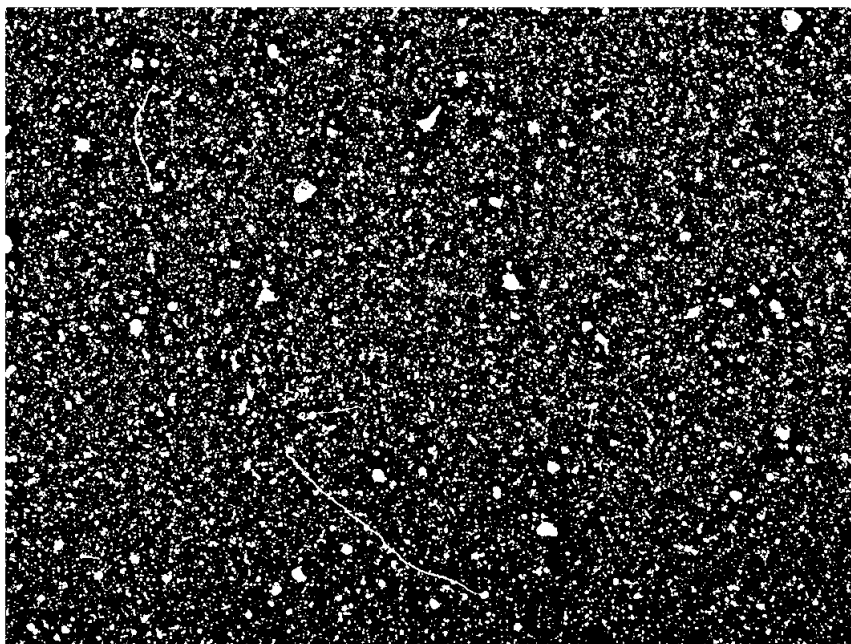

**Figure S7b:** OM image of MMM-1\*, micrograph no.7

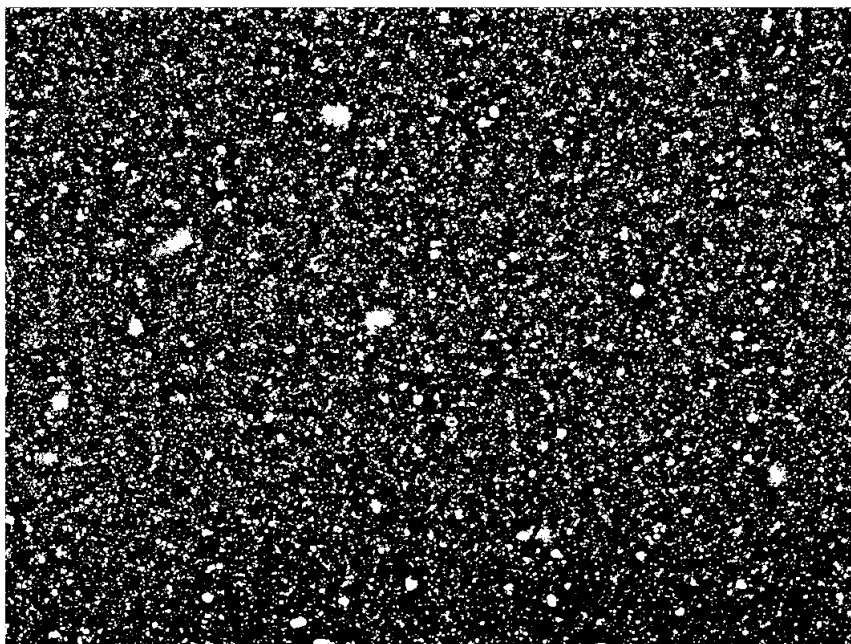

**Figure S8b:** OM image of MMM-1\*, micrograph no.8



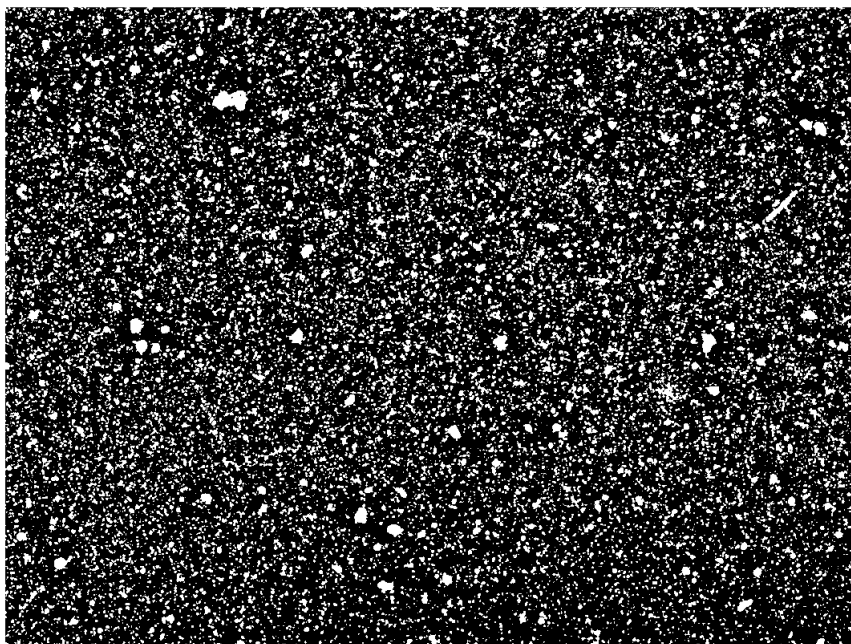

**Figure S9b:** OM image of MMM-1\*, micrograph no.9

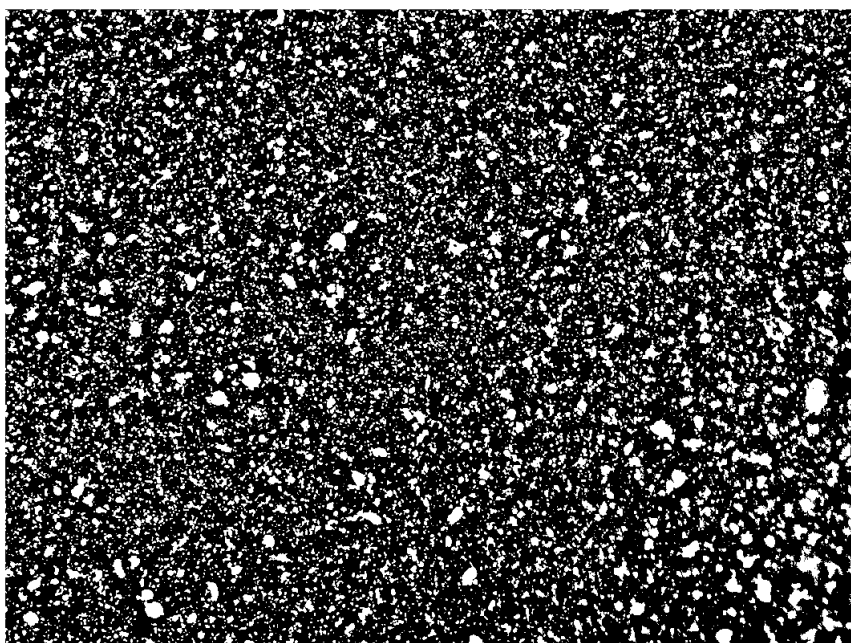

**Figure S10b:** OM image of MMM-3\*, micrograph no.1



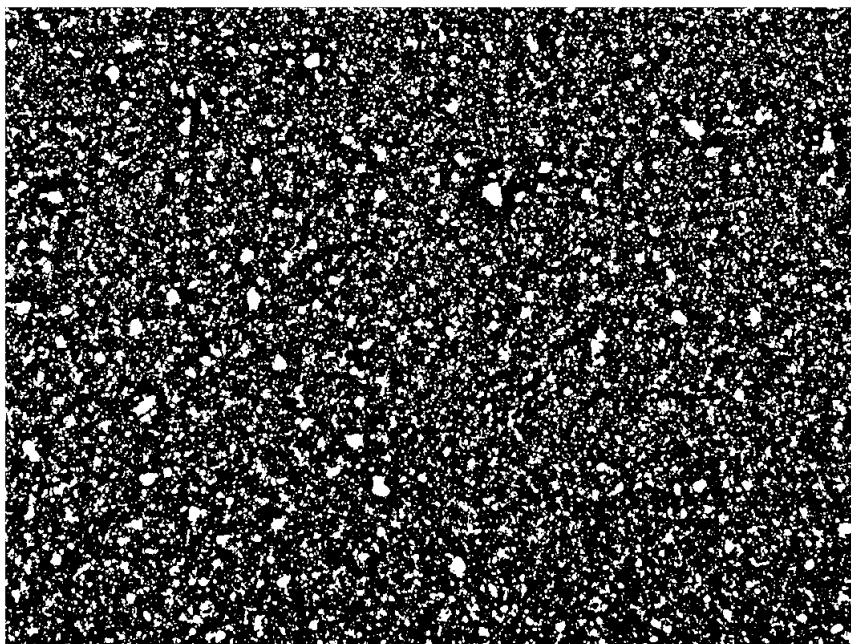

**Figure S11b:** OM image of MMM-3\*, micrograph no.2

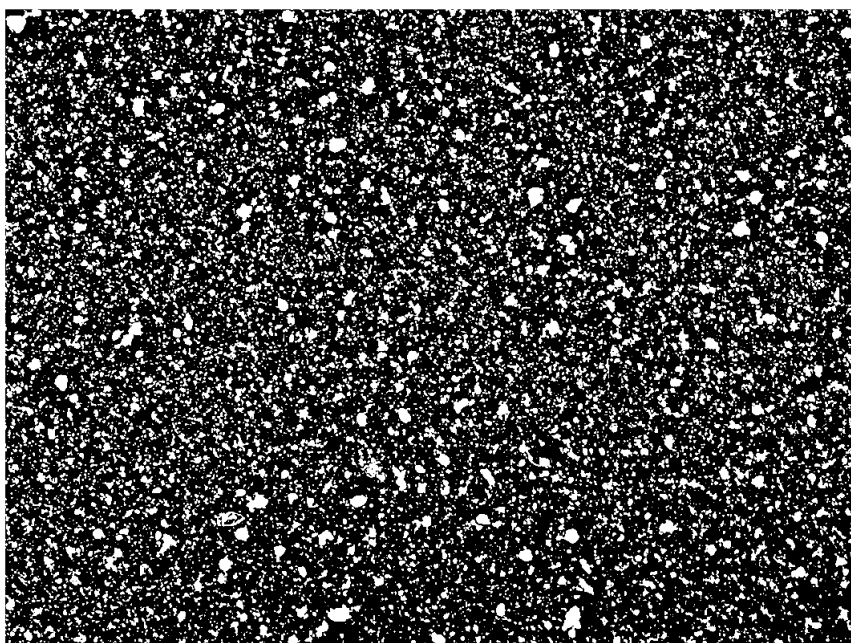

**Figure S12b:** OM image of MMM-3\*, micrograph no.3



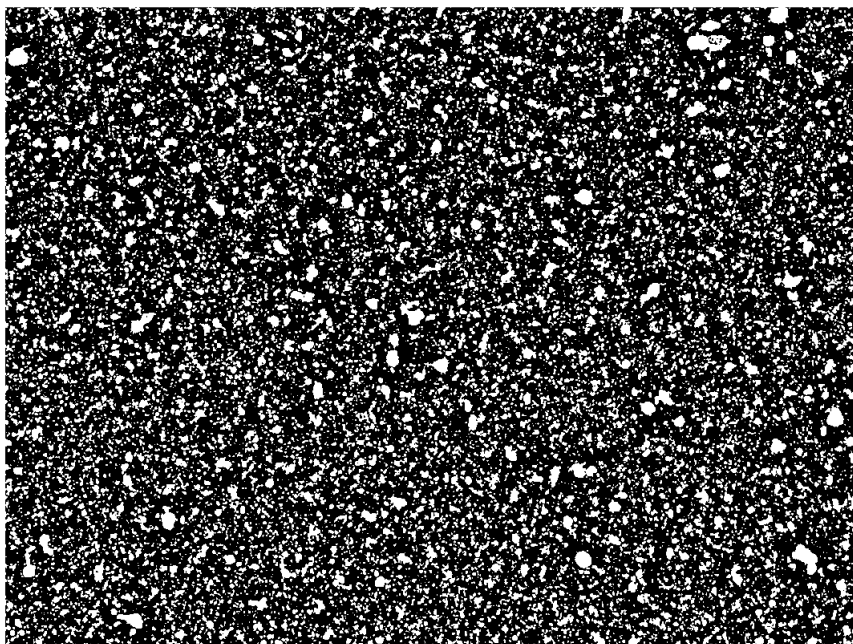

**Figure S13b:** OM image of MMM-3\*, micrograph no.4

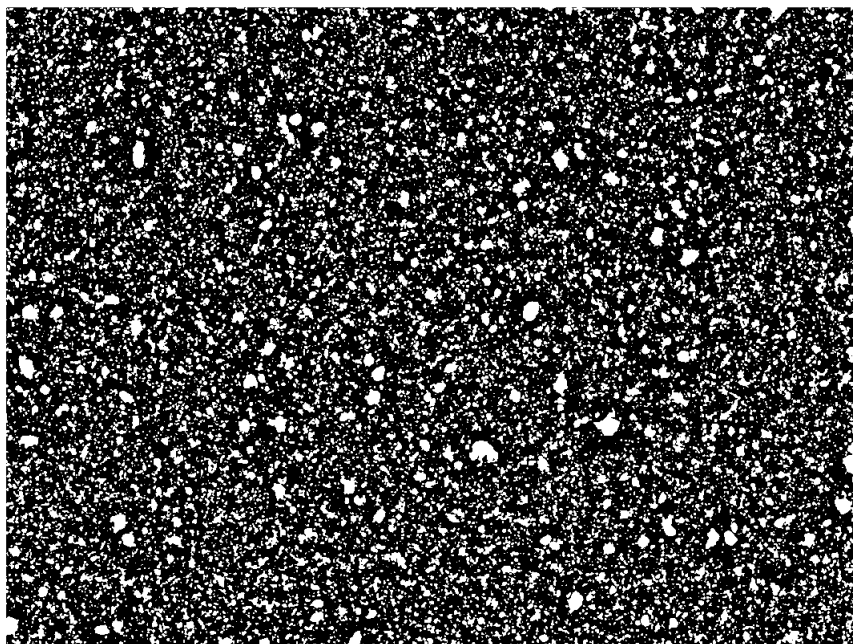

**Figure S14b:** OM image of MMM-3\*, micrograph no.5



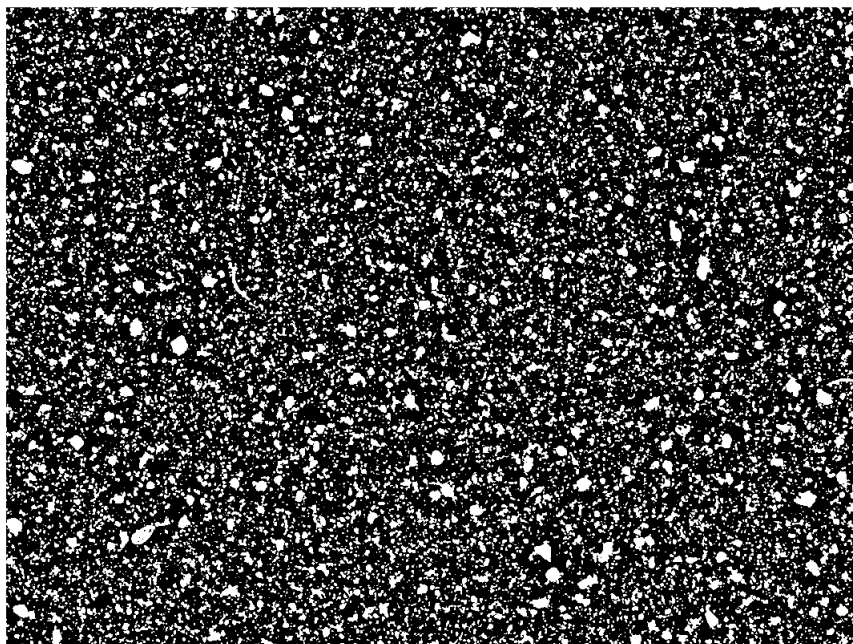

**Figure S15b:** OM image of MMM-3\*, micrograph no.6

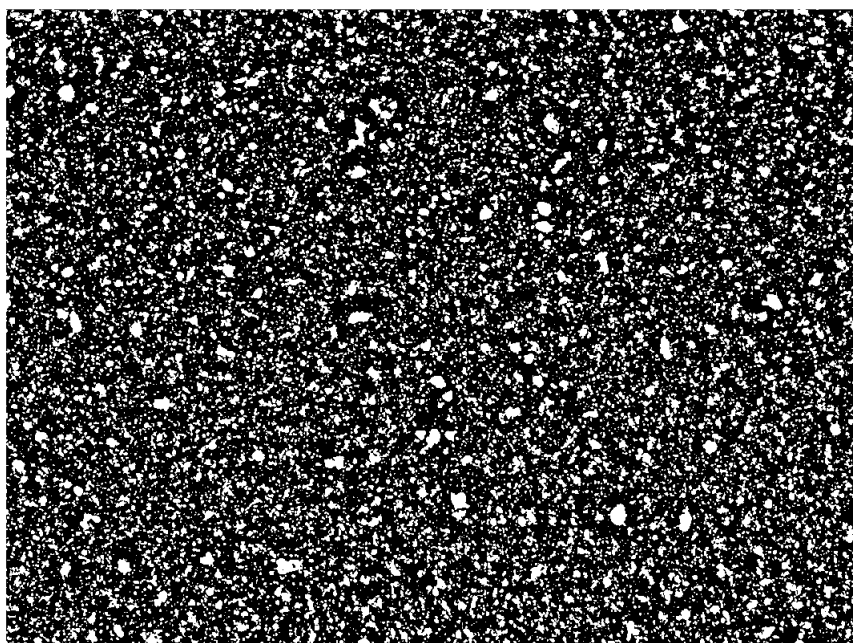

**Figure S16b:** OM image of MMM-3\*, micrograph no.7



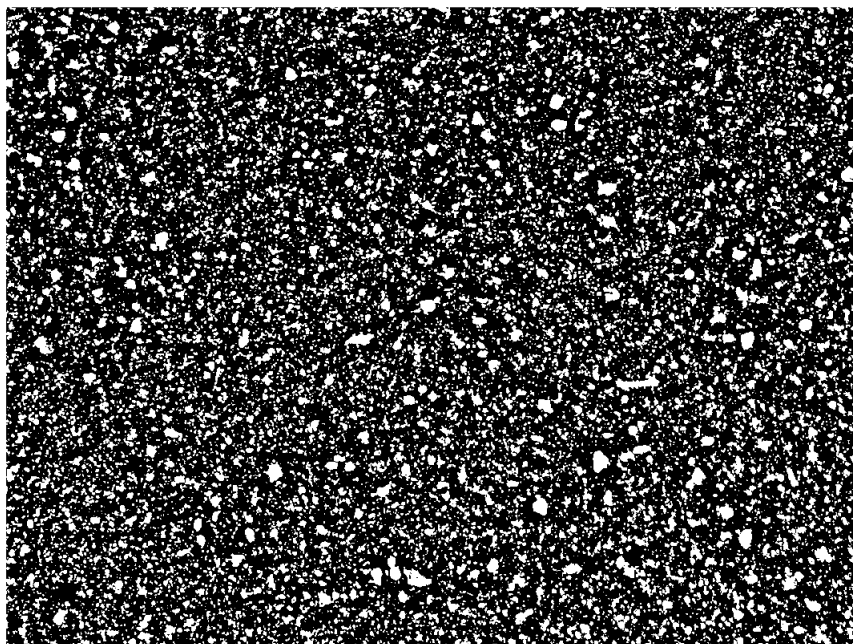

**Figure S17b:** OM image of MMM-3\*, micrograph no.8

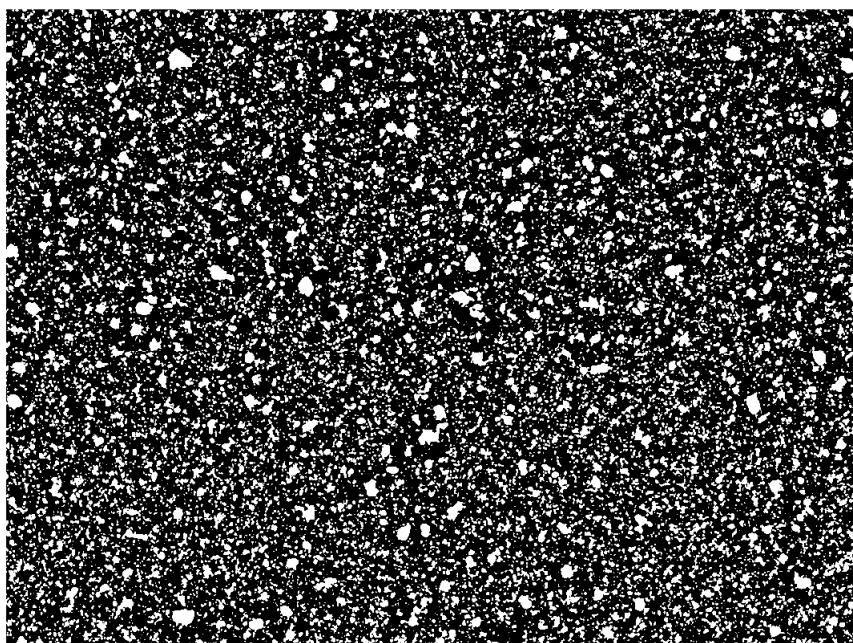

**Figure S18b:** OM image of MMM-3\*, micrograph no.9



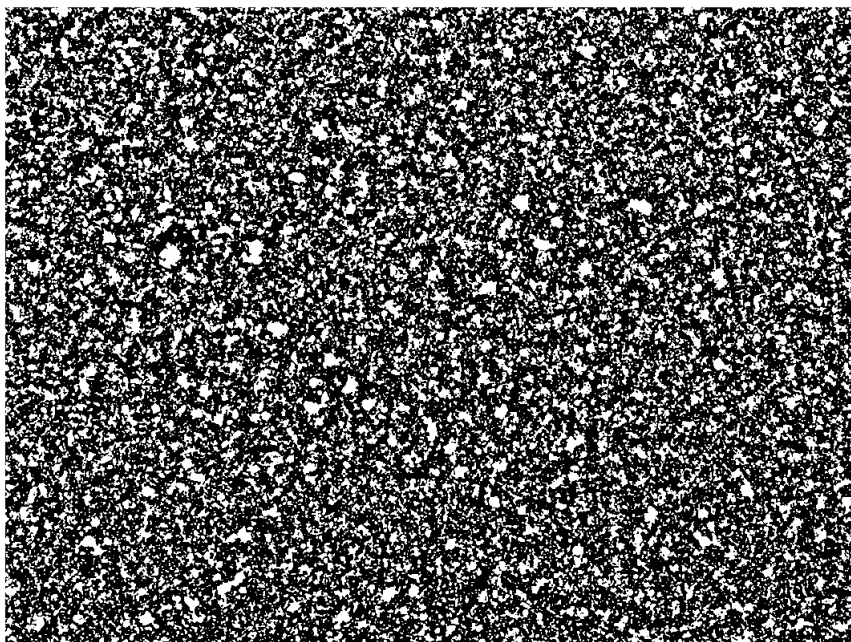

**Figure S19b:** OM image of MMM-5\*, micrograph no.1

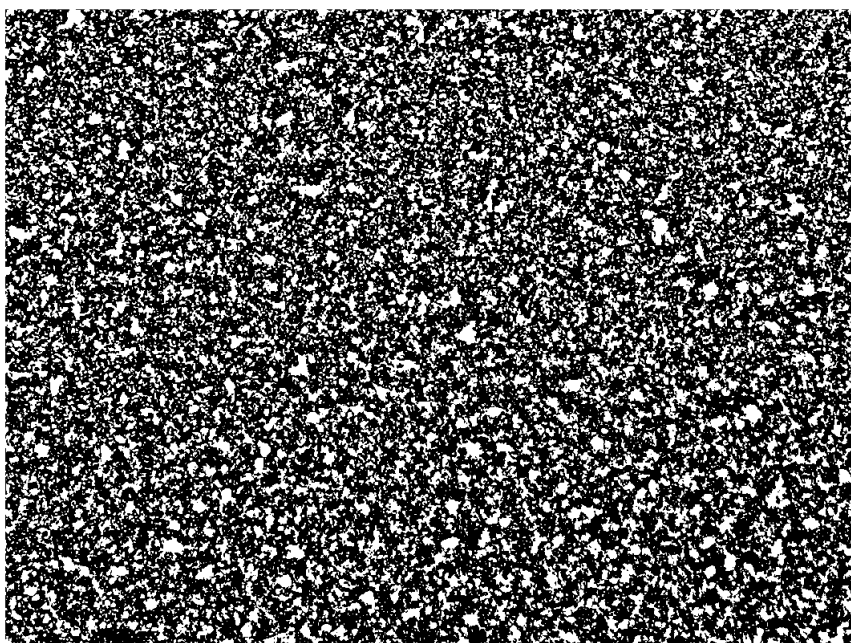

**Figure S20b:** OM image of MMM-5\*, micrograph no.2



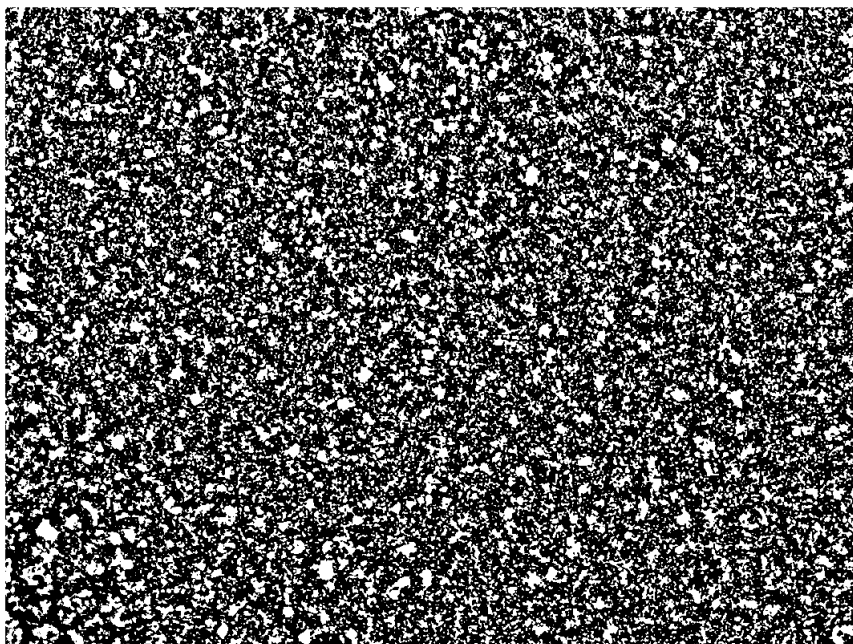

**Figure S21b:** OM image of MMM-5\*, micrograph no.3

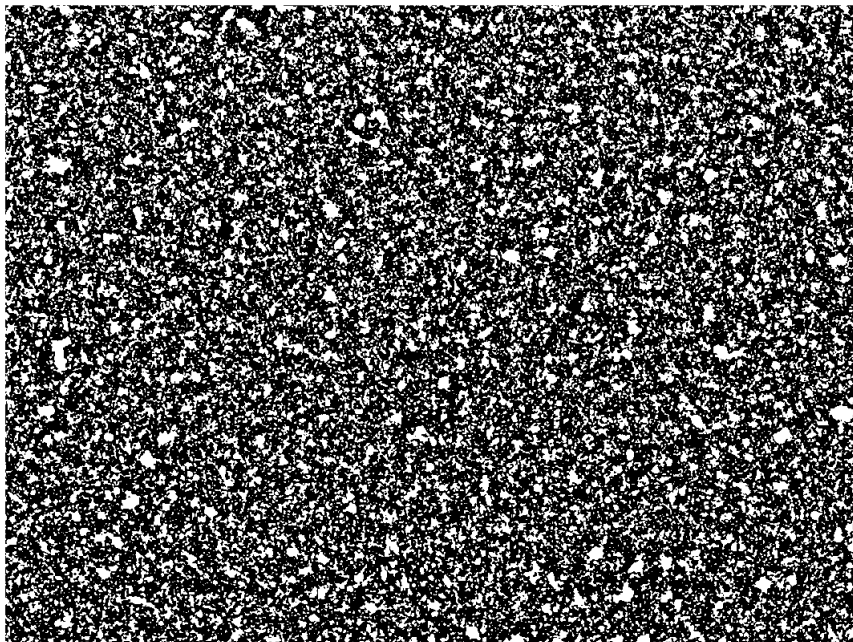

**Figure S22b:** OM image of MMM-5\*, micrograph no.4



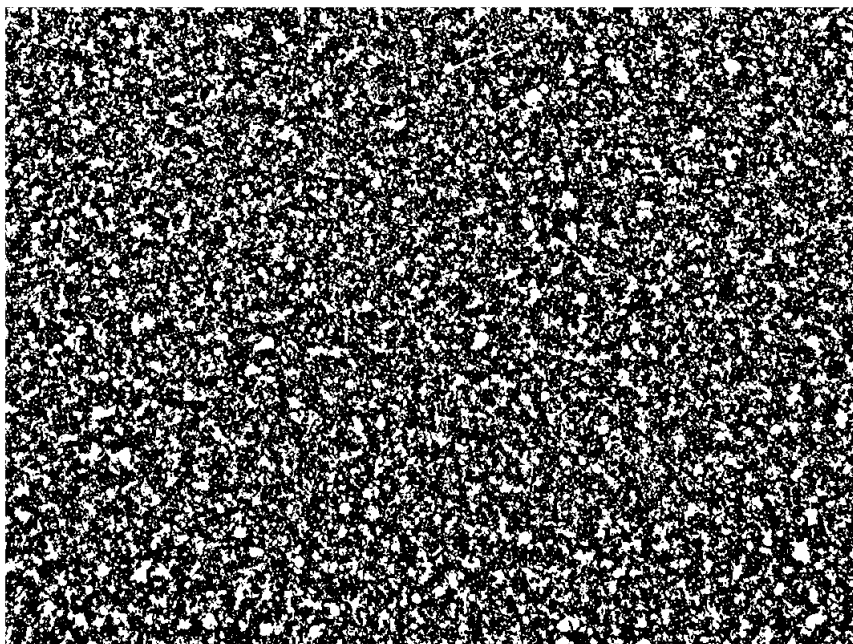

**Figure S23b:** OM image of MMM-5\*, micrograph no.5

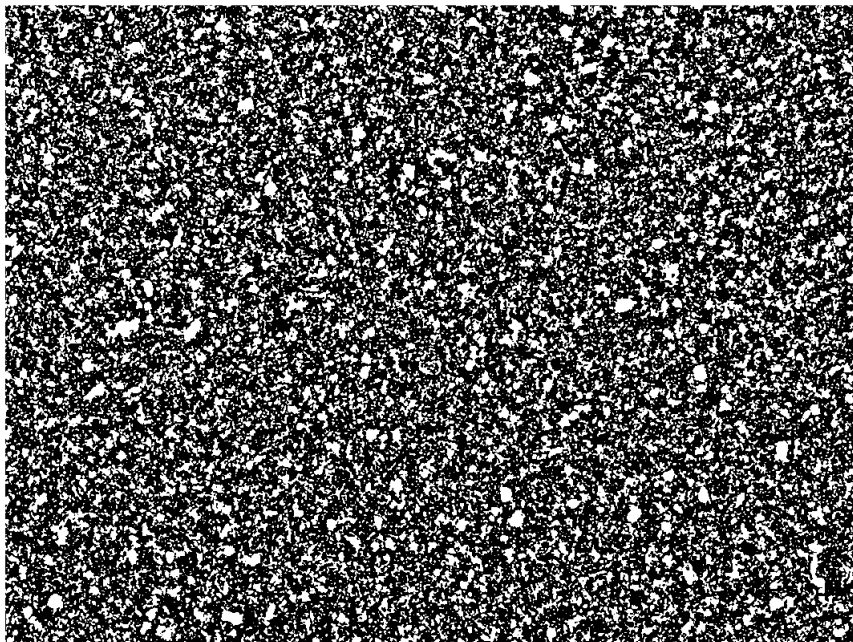

**Figure S24b:** OM image of MMM-5\*, micrograph no.6



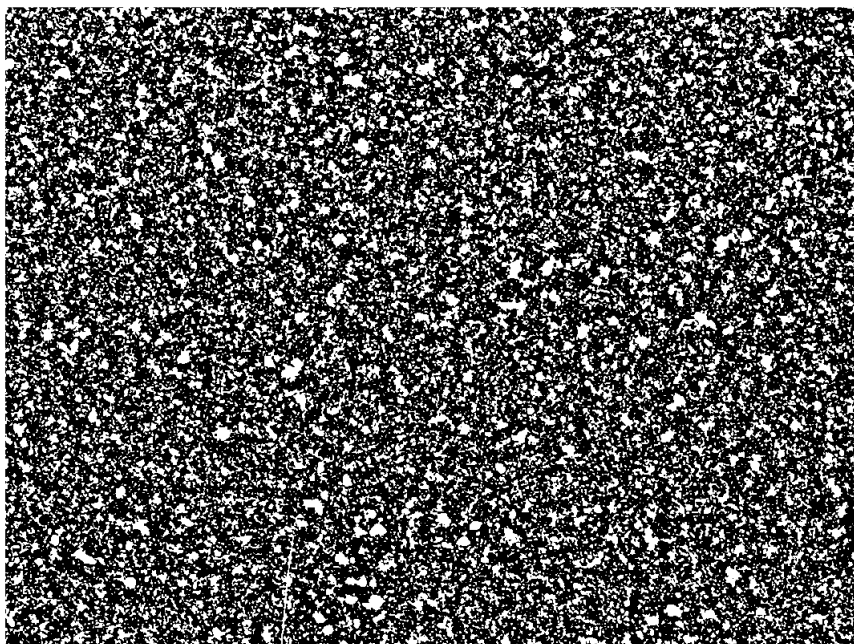

**Figure S25b:** OM image of MMM-5\*, micrograph no.7

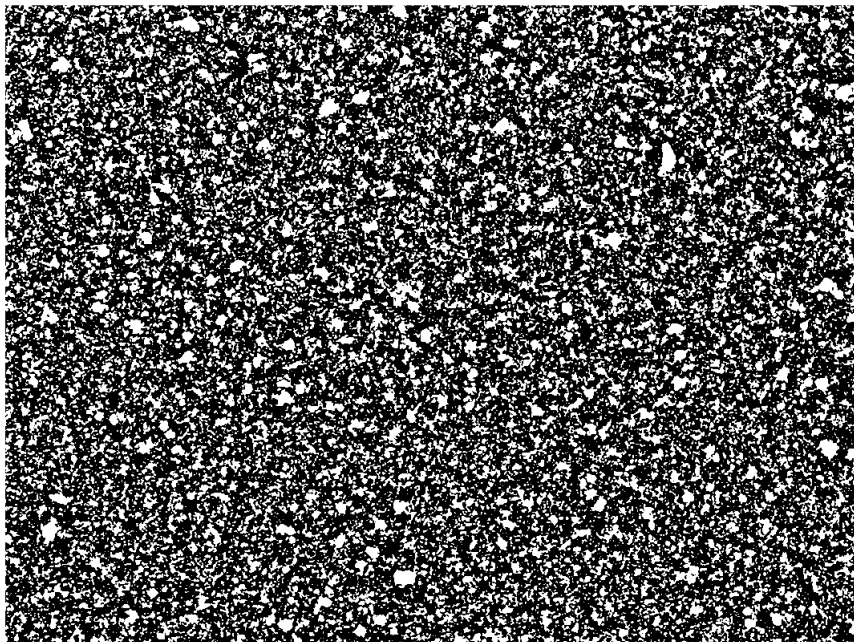

**Figure S26b:** OM image of MMM-5\*, micrograph no.8



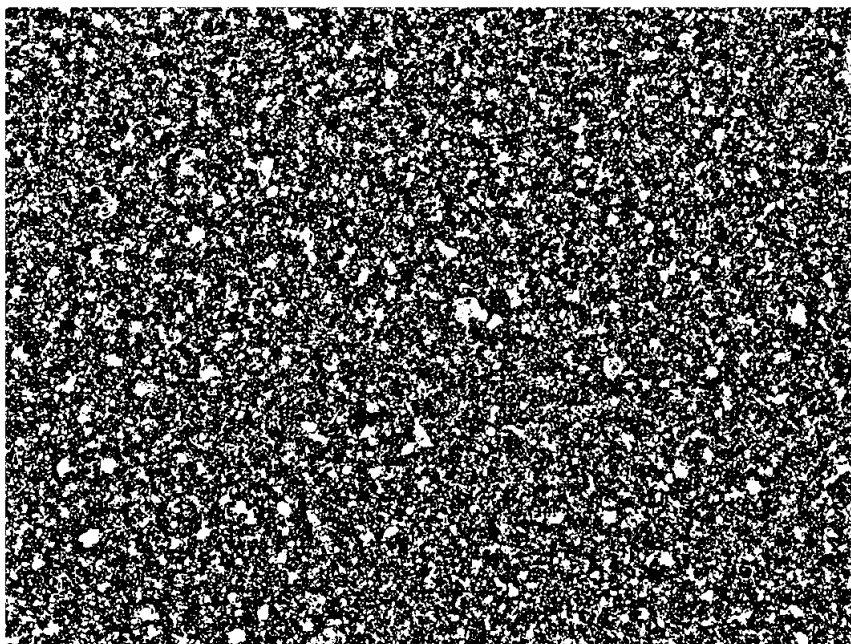

**Figure S27b:** OM image of MMM-5\*, micrograph no.9

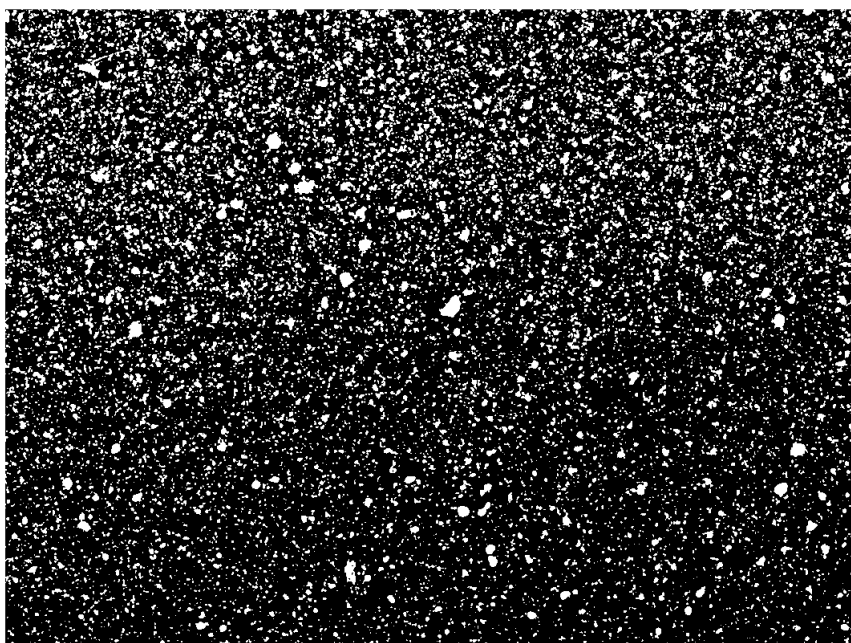

**Figure S28b:** OM image of MMM-1, micrograph no.1



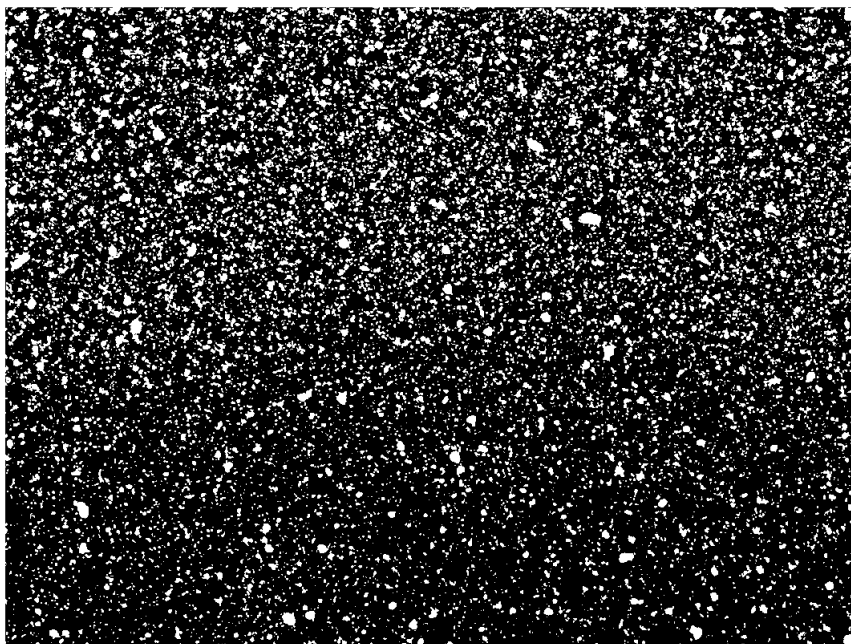

**Figure S29b:** OM image of MMM-1, micrograph no.2

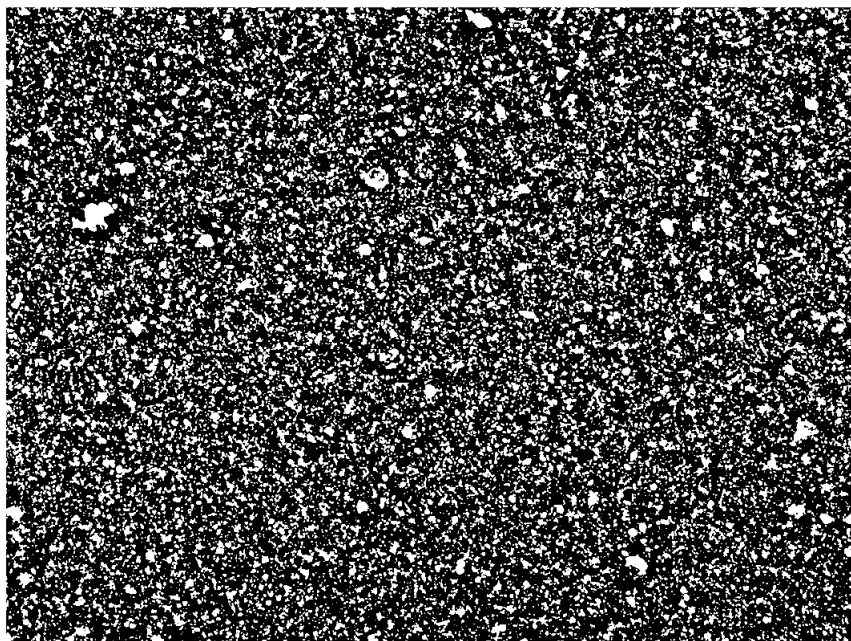

**Figure S30b:** OM image of MMM-1, micrograph no.3



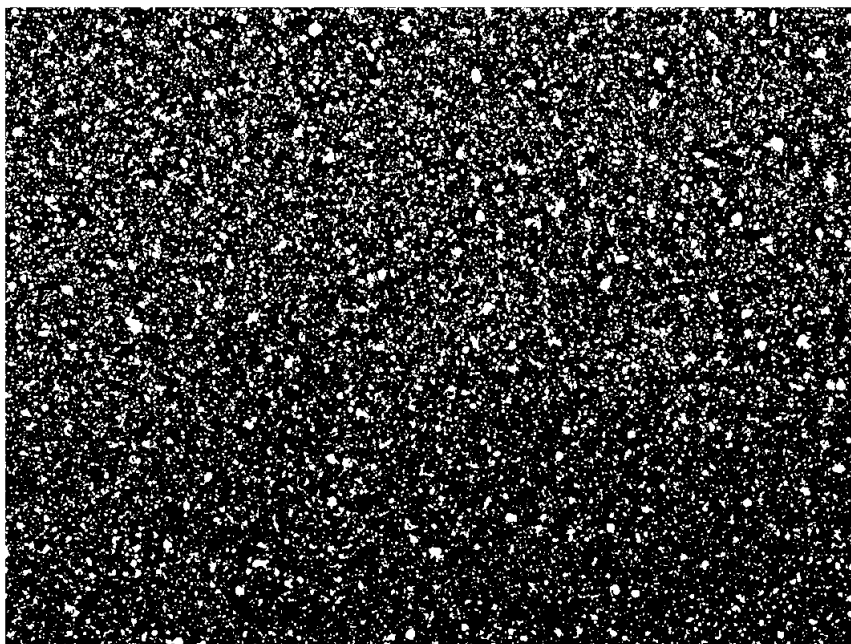

**Figure S31b:** OM image of MMM-1, micrograph no.4

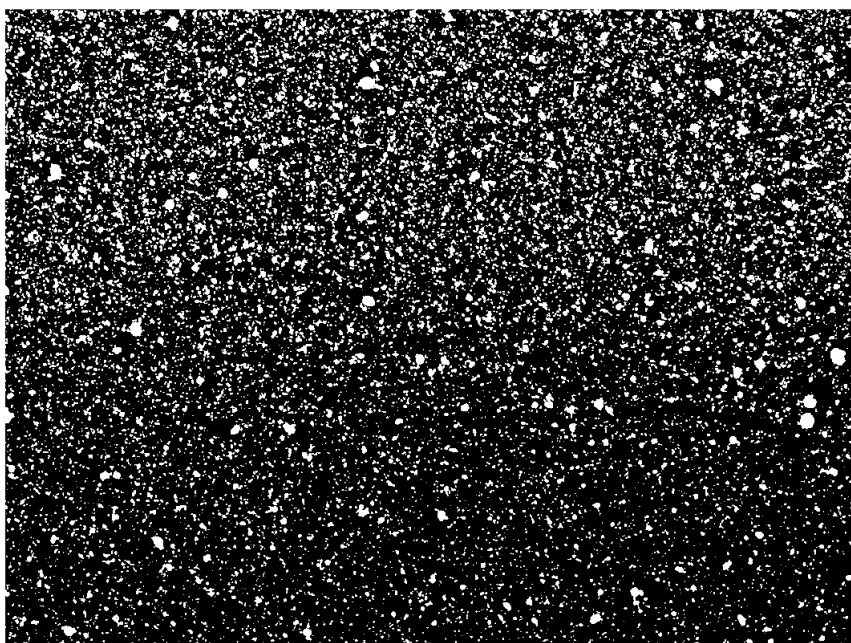

**Figure S32b:** OM image of MMM-1, micrograph no.5

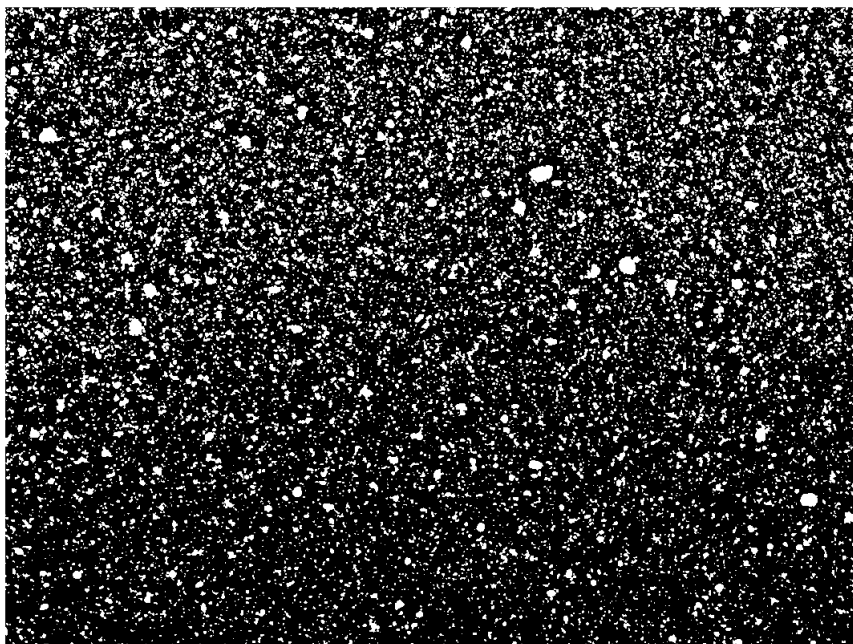

**Figure S33b:** OM image of MMM-1, micrograph no.6

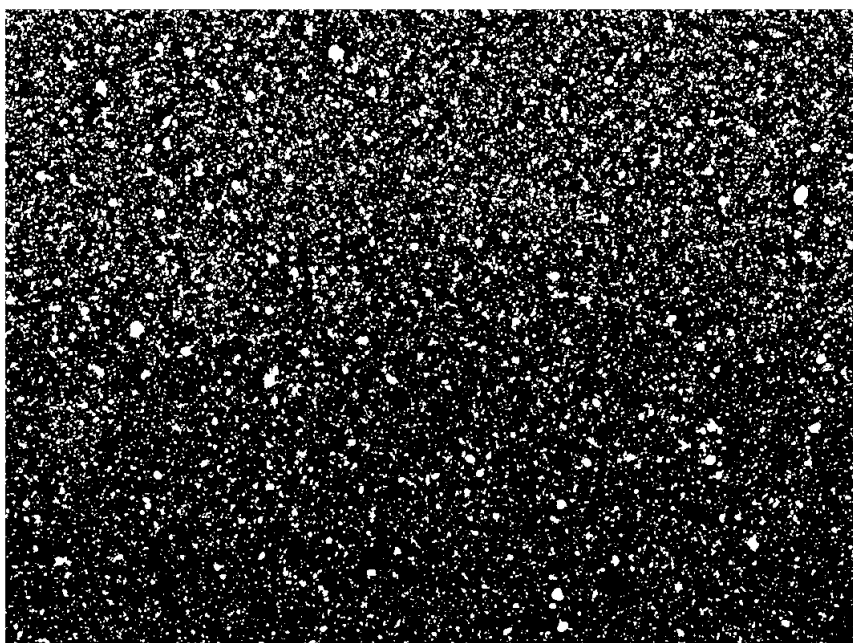

**Figure S34b:** OM image of MMM-1, micrograph no.7



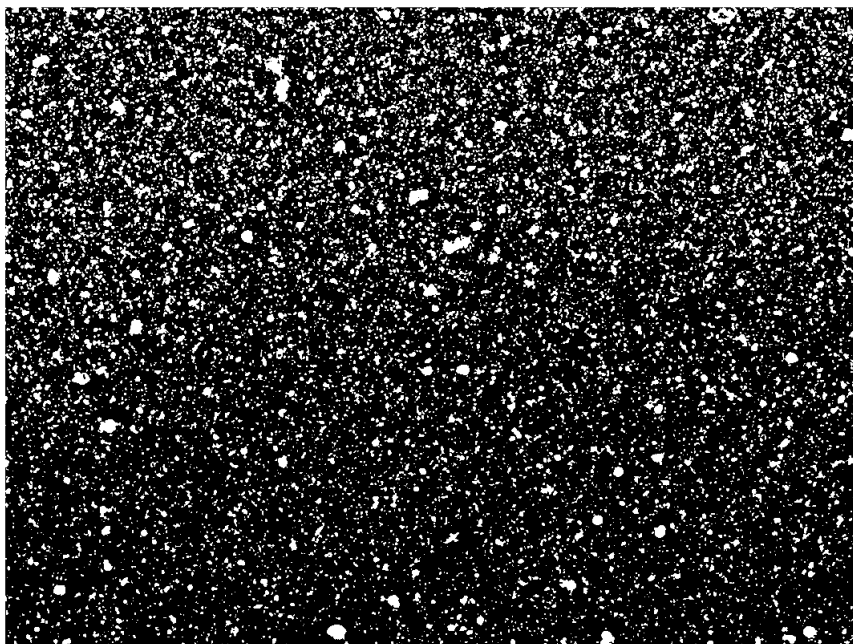

**Figure S35b:** OM image of MMM-1, micrograph no.8

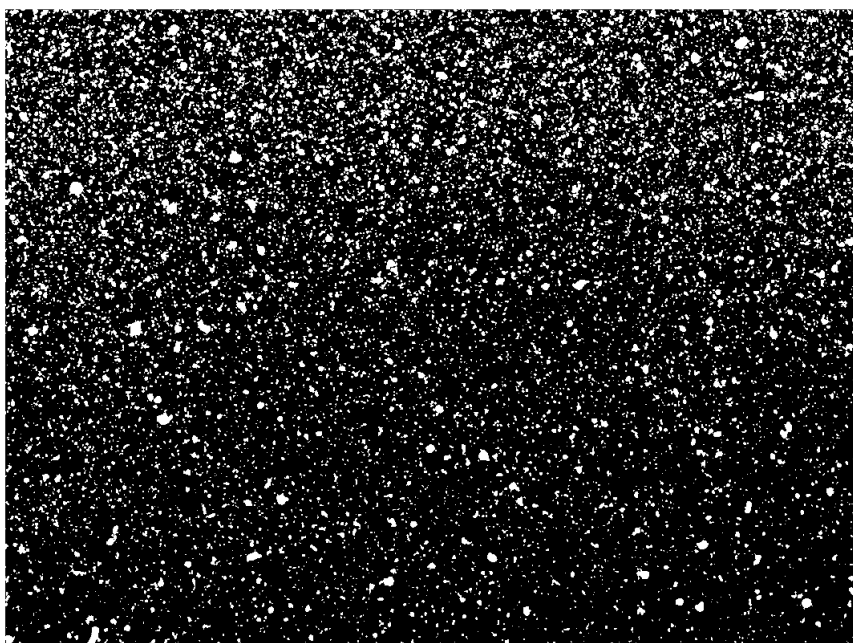

**Figure S36b:** OM image of MMM-1, micrograph no.9

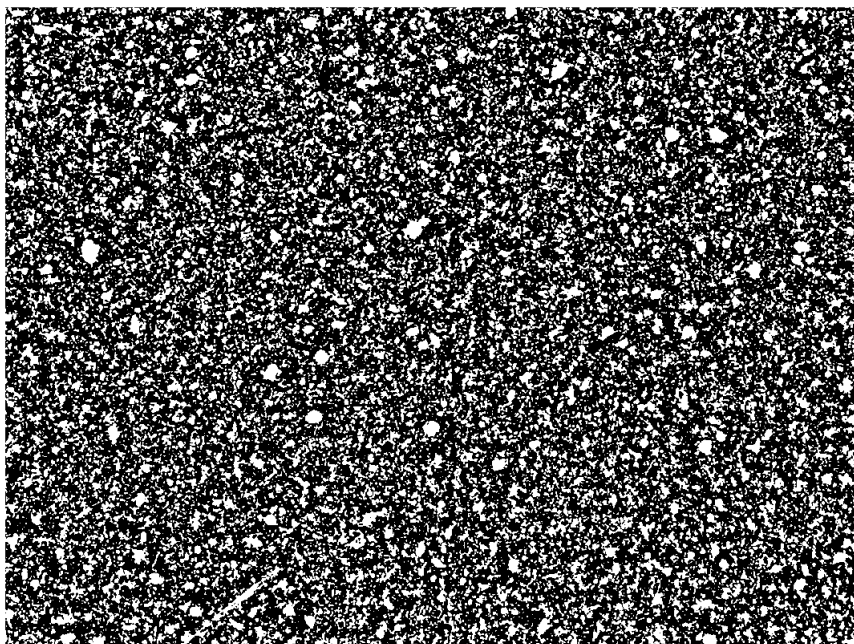

**Figure S37b:** OM image of MMM-3, micrograph no.1

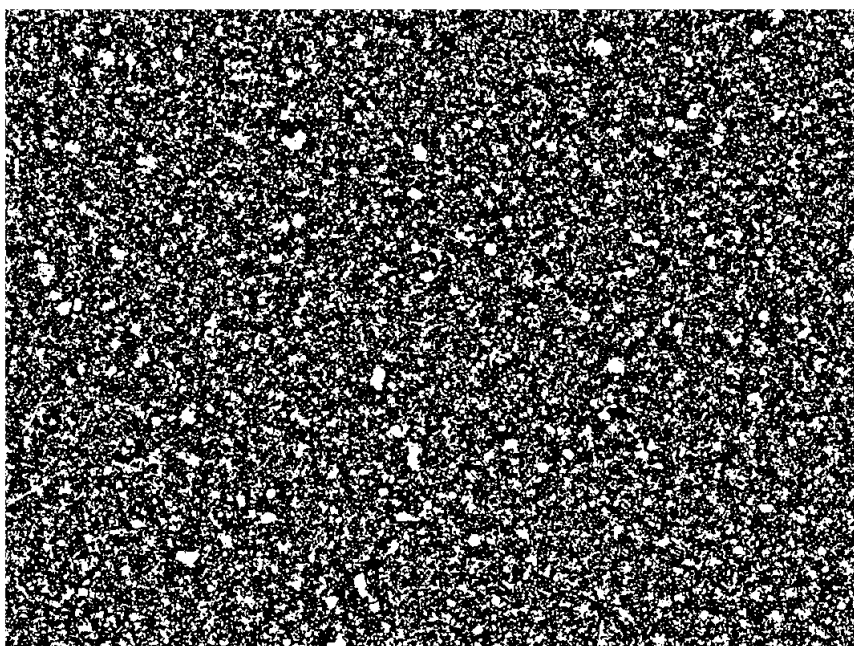

**Figure S38b:** OM image of MMM-3, micrograph no.2



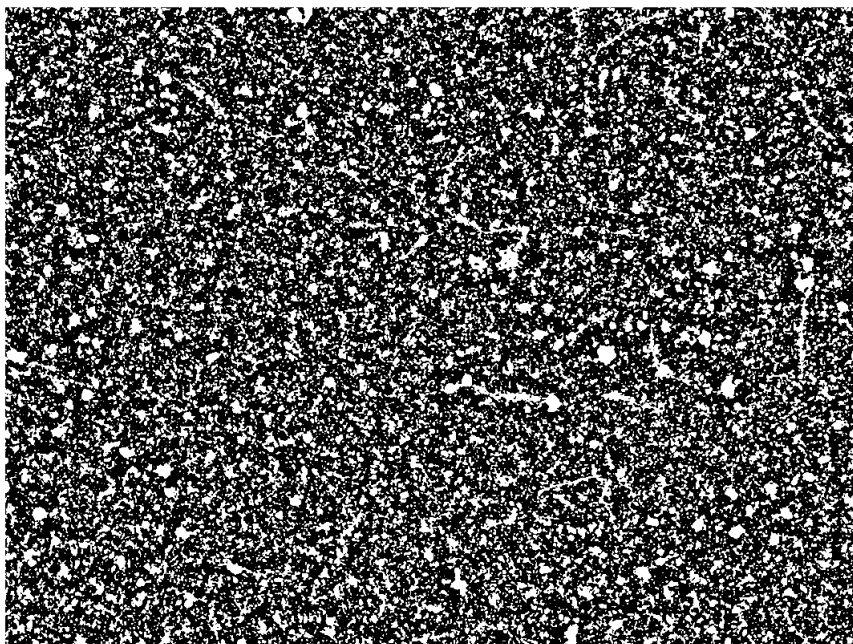

**Figure S39b:** OM image of MMM-3, micrograph no.3

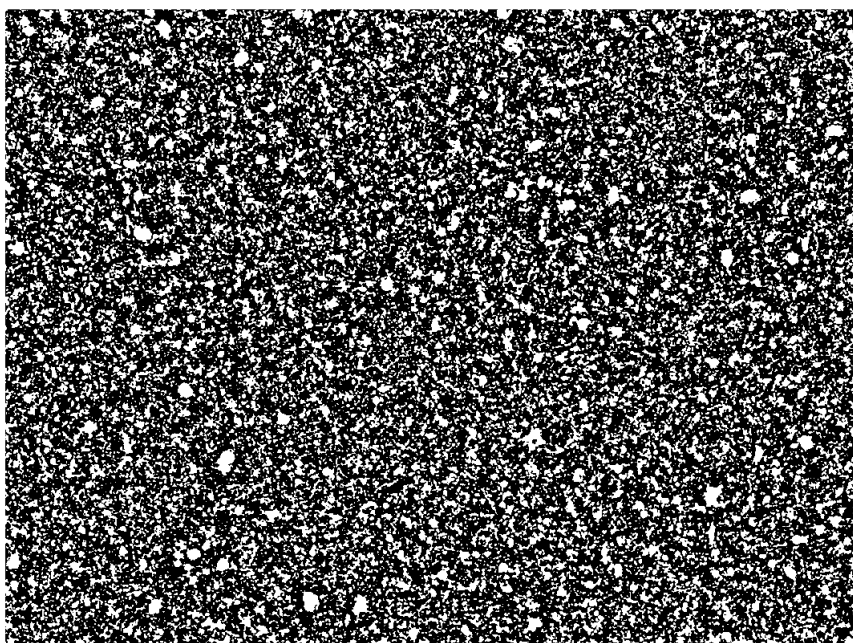

**Figure S40b:** OM image of MMM-3, micrograph no.4

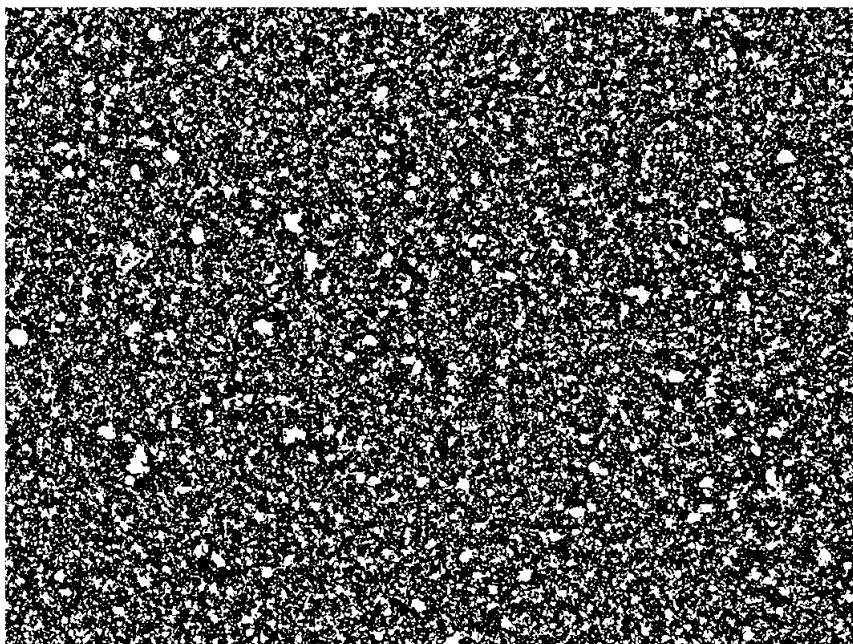

**Figure S41b:** OM image of MMM-3, micrograph no.5

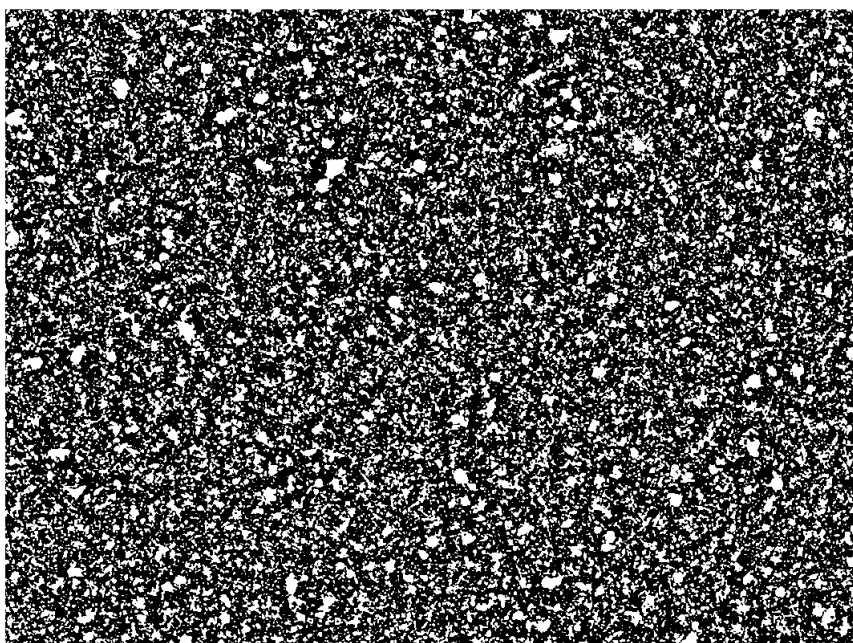

**Figure S42b:** OM image of MMM-3, micrograph no.6



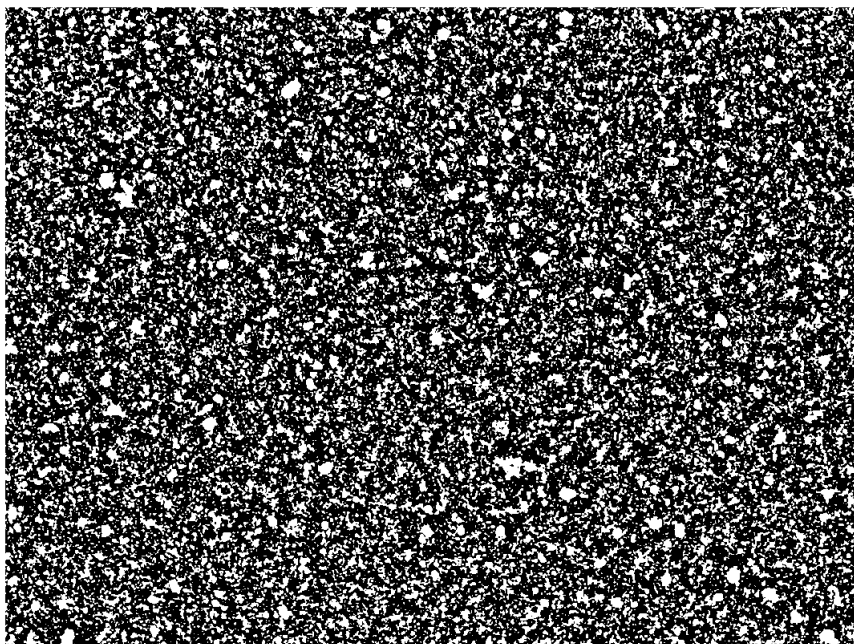

**Figure S43b:** OM image of MMM-3, micrograph no.7

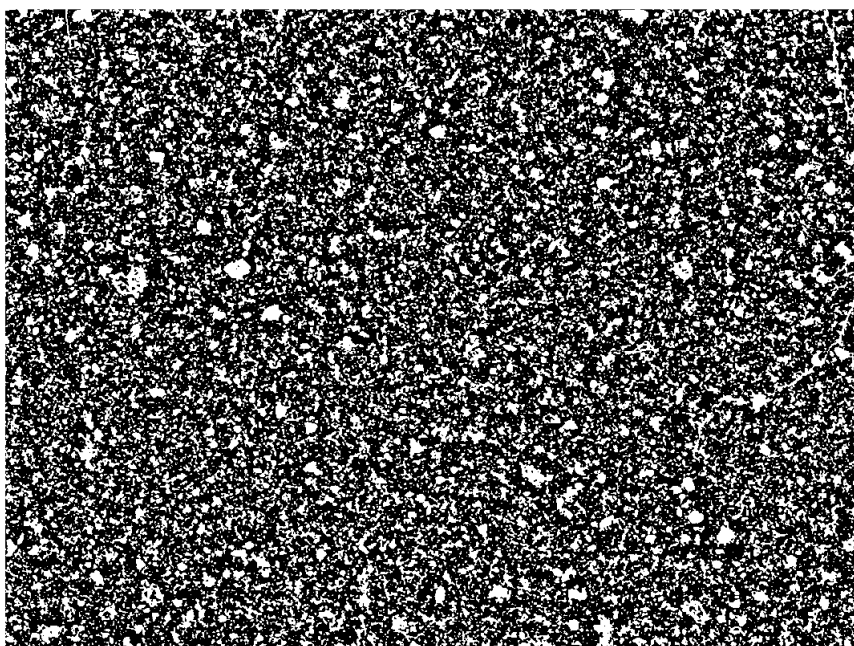

**Figure S44b:** OM image of MMM-3, micrograph no.8

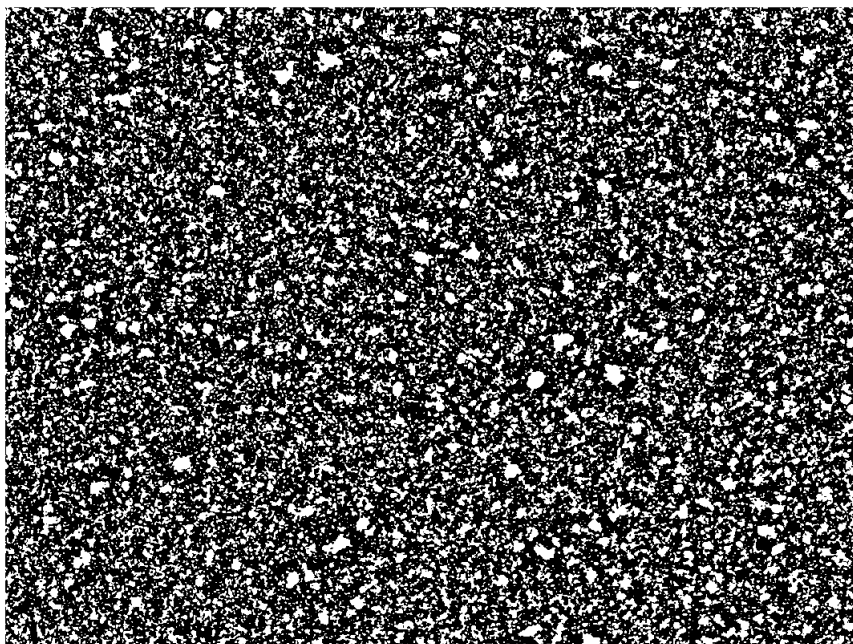

**Figure S45b:** OM image of MMM-3, micrograph no.9

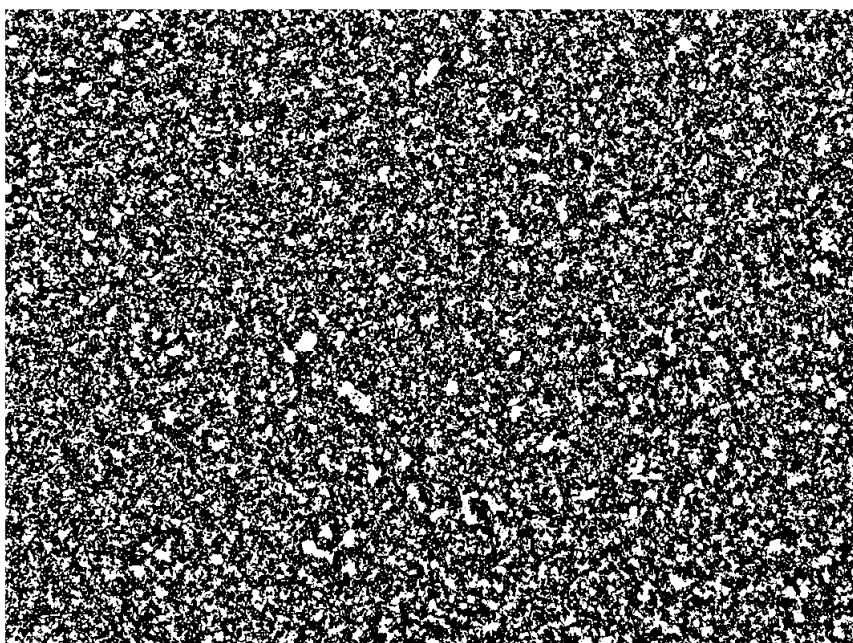

**Figure S46b:** OM image of MMM-5, micrograph no.1



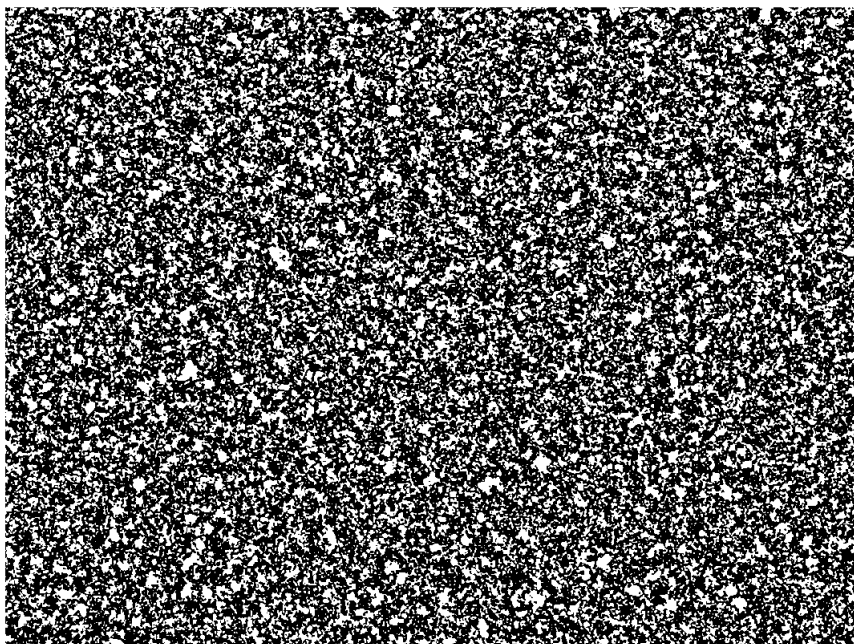

**Figure S47b:** OM image of MMM-5, micrograph no.2

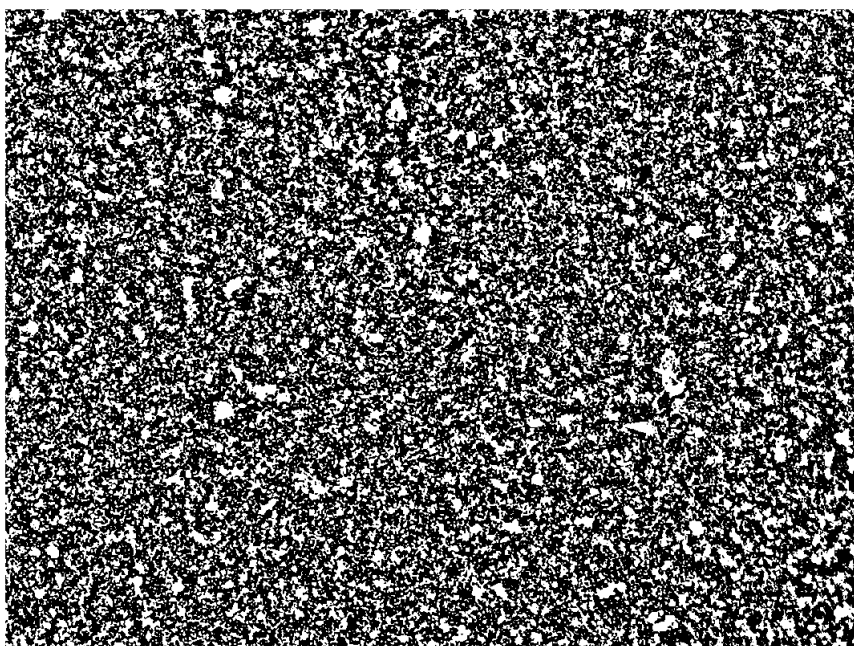

**Figure S48b:** OM image of MMM-5, micrograph no.3

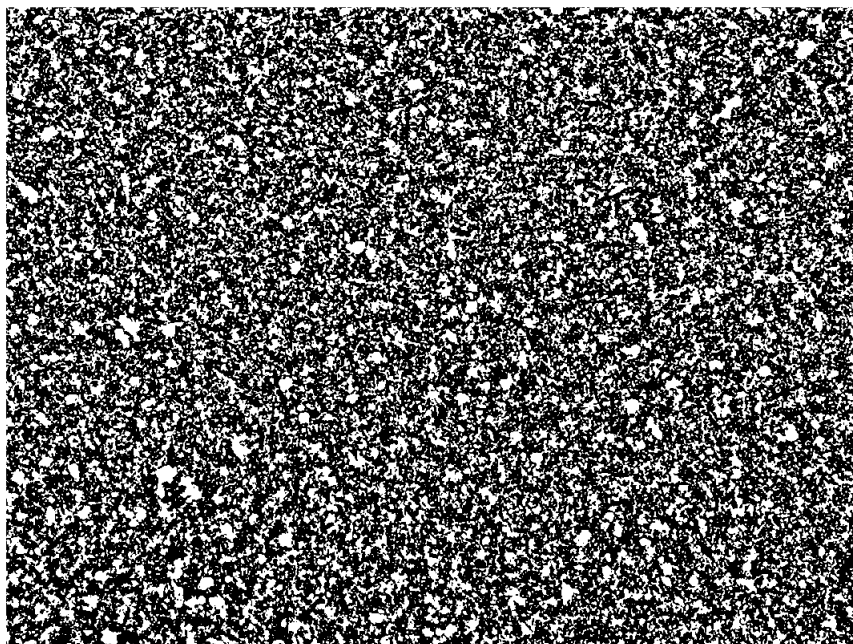

**Figure S49b:** OM image of MMM-5, micrograph no.4

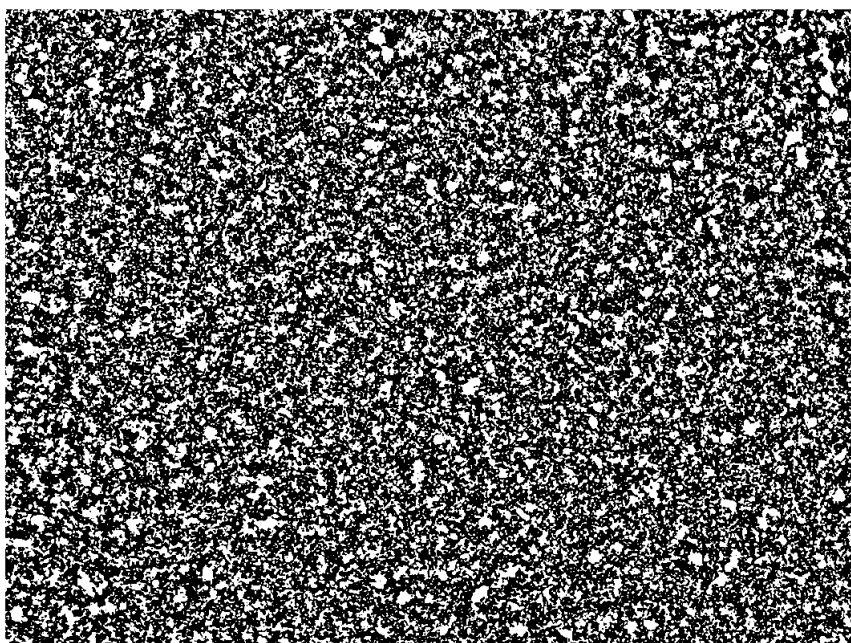

**Figure S50 b:** OM image of MMM-5, micrograph no.5



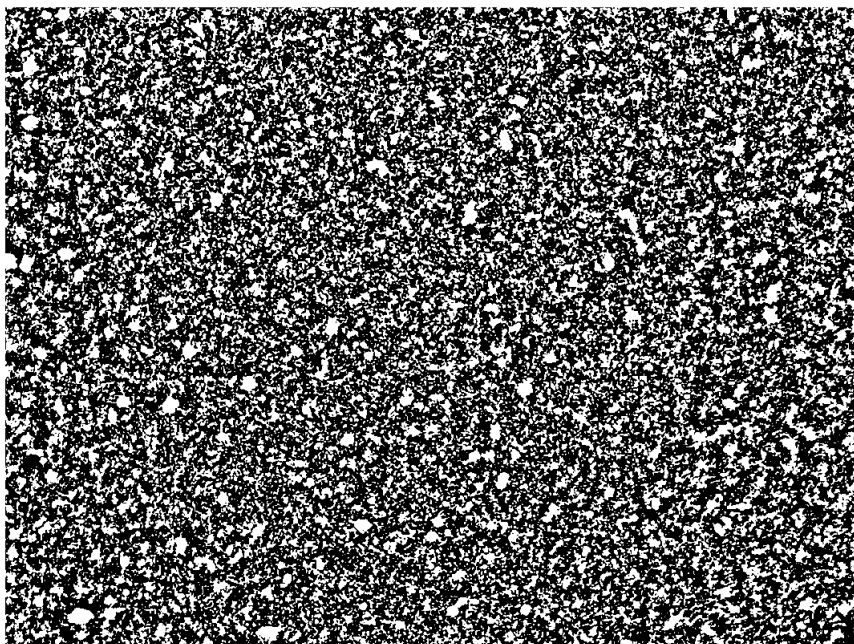

**Figure S51b:** OM image of MMM-5, micrograph no.6

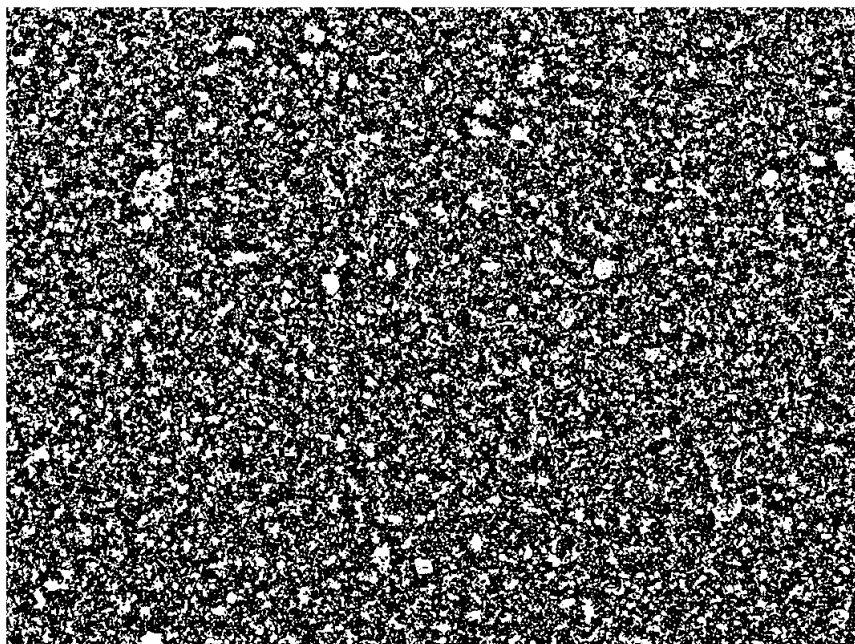

**Figure S52b:** OM image of MMM-5, micrograph no.7

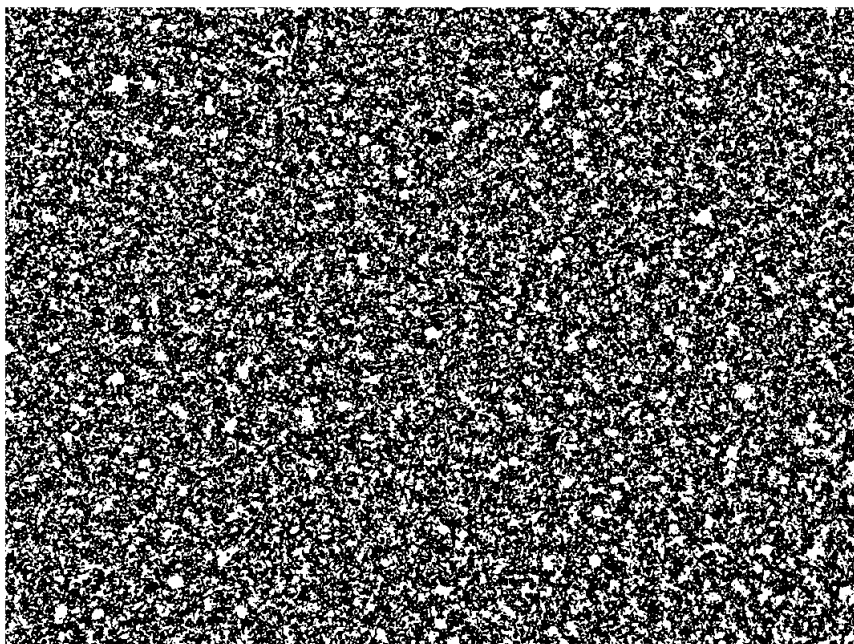

**Figure S53b:** OM image of MMM-5, micrograph no.8

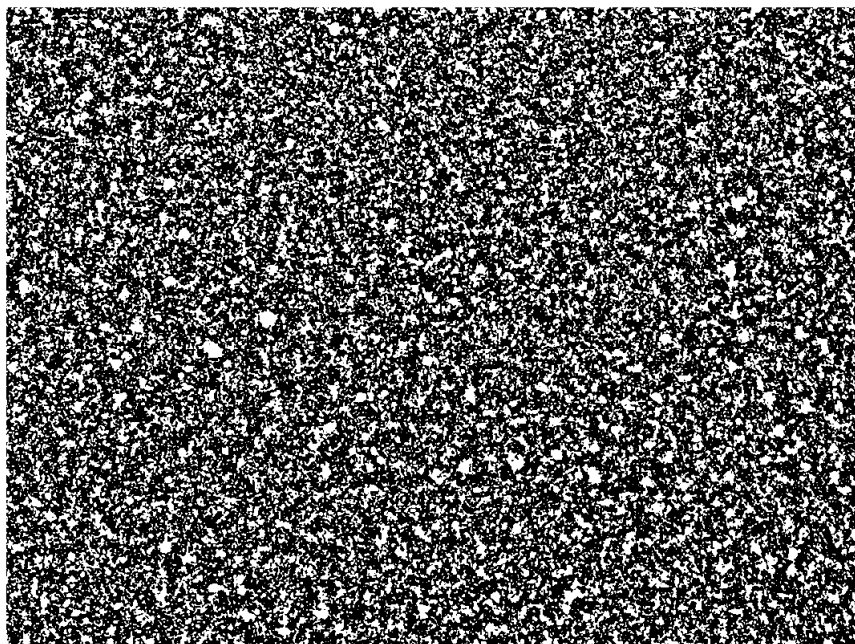

**Figure S54b:** OM image of MMM-5, micrograph no.9
